# Supplementary material for: Frequent CHD1 deletions in prostate cancers of African American men is associated with rapid disease progression
Source: PubMed Central journal article supplement — NPJ Precis Oncol. 2024 Sep 19;8:208. doi: 10.1038/s41698-024-00705-8 (PMC11411125; doi:10.1038/s41698-024-00705-8), 2024-09-19
Supplement: 41698_2024_705_MOESM1_ESM.pdf [file 41698_2024_705_MOESM1_ESM.pdf]

---

# Frequent CHD1 deletions in prostate cancers of African American men is associated with rapid disease progression

Supplementary Note

---

*Authors:*

Miklos Diossy, Viktoria Tisza, Hua Li, Pranshu Sahgal, Jia Zhou, Zsafia Sztupinszki, Denise Young, Darryl Nousome, Claire Kuo, Jiji Jiang, Yongmei Chen, Reinhard Ebner, Isabell A. Sesterhenn, Joel T. Moncur, Gregory T. Chesnut, Gyorgy Petrovics, Gregory T. Klus, Gabor Valcz, Pier Vitale Nuzzo, Dezsó Ribli, Judit Börcsök, Aurel Prosz, Marcin Krzystanek, Thomas Ried, David Szuts, Kinza Rizwan, Salma Kaochar, Shailja Pathania, Alan DAndrea, Istvan Csabai, Shiv Srivastava, Matthew L Freedman, Albert Dobi, Sandor Spisak, Zoltan Szallasi

## LIST OF SUPPLEMENTARY FIGURES

|    |                                                                                                                           |    |
|----|---------------------------------------------------------------------------------------------------------------------------|----|
| 1  | Non-declared ancestry classification on SNP-array data . . . . .                                                          | 1  |
| 2  | Average raw copy numbers in AA and CA PRAD individuals according to TCGA SNP array data (chromosome 5) . . . . .          | 2  |
| 3  | The design strategy of FISH probes for CHD1 and chromosome 5 short arm . . . . .                                          | 2  |
| 4  | Discordance maps . . . . .                                                                                                | 4  |
| 5  | Survival plots . . . . .                                                                                                  | 6  |
| 6  | Distribution of the self-declared ancestries within the TCGA WES dataset . . . . .                                        | 8  |
| 7  | Distributions of the number of individuals supporting SNPs in the ExAC database . . . . .                                 | 8  |
| 8  | The ten most ancestry-specific SNPs of the three most frequent WES ancestry groups . . . . .                              | 9  |
| 9  | Frequencies of the exonic germline mutations within the PRAD-US whole exomes . . . . .                                    | 10 |
| 10 | Scree plot of the ancestry-genotype matrix G . . . . .                                                                    | 10 |
| 11 | Projection of the ancestry genotype matrix onto its first few principal components . . . . .                              | 11 |
| 12 | Euclidean mean distances in the PC1-PC2 space - Outlier Detection 1 . . . . .                                             | 12 |
| 13 | Outliers of the three ancestries - Outlier Detection 2 . . . . .                                                          | 13 |
| 14 | Learnt distributions of the ancestries in the PC1-PC2 space of the genotype matrix . . . . .                              | 14 |
| 15 | Predicted probabilities of samples of the test set . . . . .                                                              | 14 |
| 16 | Estimated Accuracy of the Bayes Classifier . . . . .                                                                      | 15 |
| 17 | Predicted probabilities of samples of the "not reported" and "outlier" samples . . . . .                                  | 15 |
| 18 | Learnt distributions of the ancestries in the PC1-PC2 space of the genotype matrix and the "not reported cases" . . . . . | 16 |
| 19 | Final distribution of the validated ancestries in the TCGA WES dataset . . . . .                                          | 16 |
| 20 | Number of patients with AA/CA self-declared ancestries among the PRAD WGS samples . . . . .                               | 17 |
| 21 | Distribution of the self-declared ancestries of the PRAD WGS samples . . . . .                                            | 17 |
| 22 | Predicted probabilities of samples of the "not reported" and "outlier" samples - WGS . . . . .                            | 18 |
| 23 | The estimated distribution of the prevalence of CHD1 loss in PRAD . . . . .                                               | 19 |
| 24 | Genotyping of the NGS data . . . . .                                                                                      | 20 |
| 25 | Assessing the probability that the deletion is heterozygous . . . . .                                                     | 22 |
| 26 | HRD-related genomic scars - WGS . . . . .                                                                                 | 27 |
| 27 | 2nd generation single nucleotide signature contributions – WGS . . . . .                                                  | 28 |
| 28 | Cosine similarities between the original and reconstructed mutational spectra - SNVs . . . . .                            | 29 |
| 29 | SBS mutational signature compositions - WGS . . . . .                                                                     | 30 |
| 30 | 3rd generation single nucleotide (SBS) signatures . . . . .                                                               | 31 |
| 31 | Cosine similarities between the original and reconstructed mutational spectra - Indels . . . . .                          | 33 |
| 32 | ID mutational signature compositions - WGS . . . . .                                                                      | 34 |
| 33 | ID signature contributions - WGS . . . . .                                                                                | 35 |
| 34 | Classification of Deletions - WGS . . . . .                                                                               | 37 |
| 35 | Rearrangement signatures - WGS . . . . .                                                                                  | 38 |
| 36 | HRDetect score summary - WGS . . . . .                                                                                    | 40 |
| 37 | HRDetect scores in CHD1 loss vs. control samples – WES . . . . .                                                          | 40 |
| 38 | Linearized HRDetect score summary - WGS . . . . .                                                                         | 41 |
| 39 | HRD-scores – WES . . . . .                                                                                                | 42 |
| 40 | HRD-related genomic scars - WES . . . . .                                                                                 | 43 |
| 41 | 2nd generation single nucleotide signature contributions – WES . . . . .                                                  | 44 |
| 42 | Classification of Deletions - WES . . . . .                                                                               | 46 |
| 43 | HRDetect score summary – WES . . . . .                                                                                    | 47 |
| 44 | HRDetect scores in CHD1 loss vs. control samples – WES . . . . .                                                          | 47 |
| 45 | Uncropped blot figures 6 . . . . .                                                                                        | 48 |
| 46 | Uncropped blot figures 7 . . . . .                                                                                        | 49 |
| 47 | Illustration of the CHD1 isogenic clone generation for WGS . . . . .                                                      | 49 |
| 48 | Cell line cultures - RAD51 foci formation - controls . . . . .                                                            | 50 |
| 49 | Olaparib sensitivity in PC3 cell line . . . . .                                                                           | 51 |

|    |                                                                                                                |    |
|----|----------------------------------------------------------------------------------------------------------------|----|
| 50 | <i>SPOP</i> <sup>F102C</sup> overexpression in PC-3 and 22Rv1 parental and CHD1 knock out cell lines . . . . . | 52 |
| 51 | Uncropped blot figures 1 . . . . .                                                                             | 53 |
| 52 | Uncropped blot figures 2 . . . . .                                                                             | 54 |
| 53 | Uncropped blot figures 3 . . . . .                                                                             | 55 |
| 54 | Uncropped blot figures 4 . . . . .                                                                             | 56 |
| 55 | Uncropped blot figures 5 . . . . .                                                                             | 57 |
| 56 | Uncropped blot figures 6 . . . . .                                                                             | 58 |
| 57 | Uncropped blot figures 7 . . . . .                                                                             | 59 |

## LIST OF SUPPLEMENTARY TABLES

|   |                                                    |   |
|---|----------------------------------------------------|---|
| 1 | Supplementary tables of the TMA analysis . . . . . | 3 |
|---|----------------------------------------------------|---|

## SUPPLEMENTARY DATA

- **Supplementary Data 1:** Subclonal CHD1 loss prediction in the WGS cohorts (available separately in xlsx format)
- **Supplementary Data 2:** Subclonal CHD1 loss prediction in the WES cohorts (available separately in xlsx format)

## 1 SUPPLEMENTARY MATERIAL

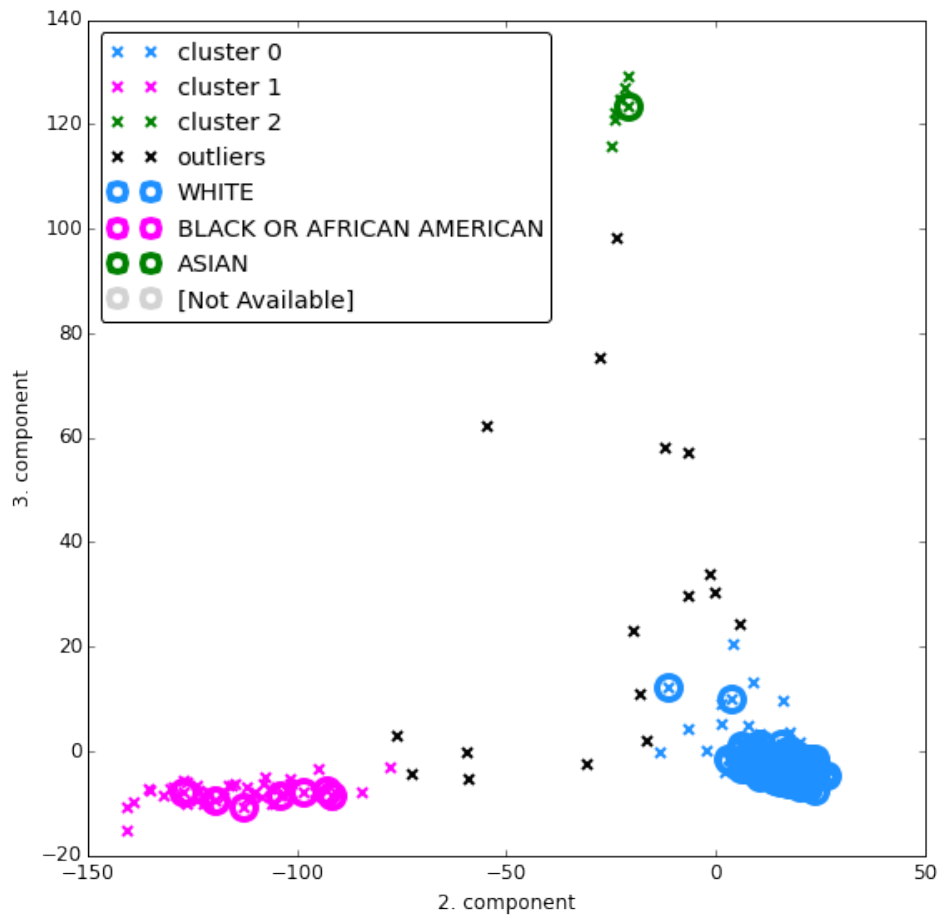

**Supplementary Figure 1:** Non-declared ancestry classification on SNP-array data. Circles indicate samples with self declared ancestry, while colored crosses indicate the density-estimated clusters, according to the DBSCAN classification algorithm.

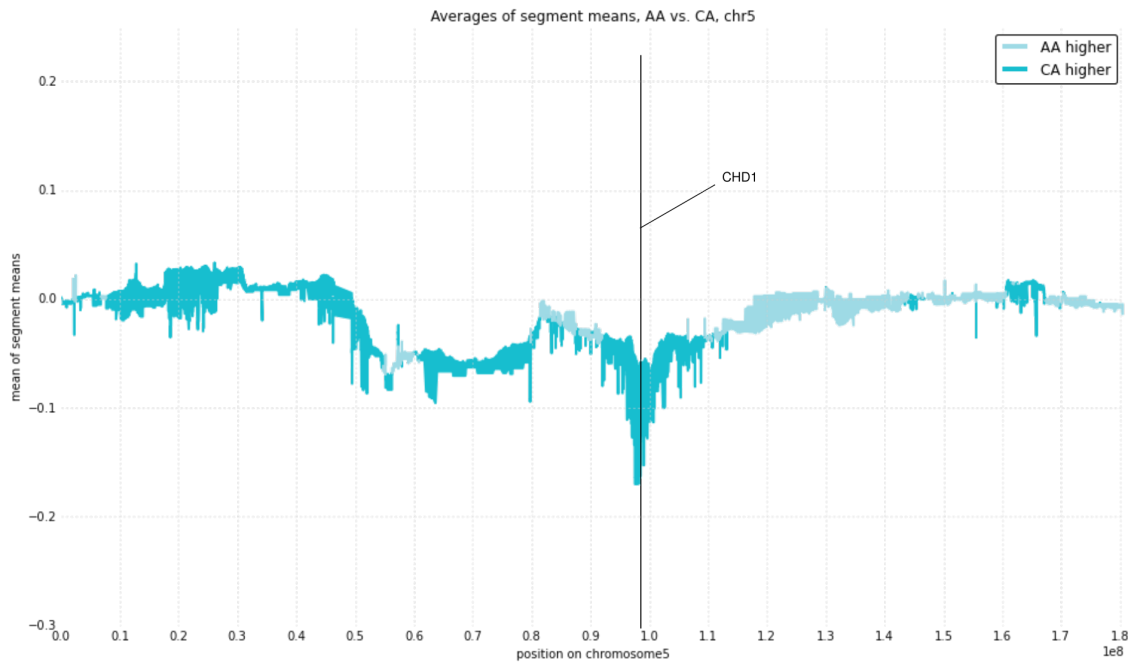

**Supplementary Figure 2:** The average raw copynumbers of Caucasian (CA) and African American (AA) individuals on chromosome 5. The plotting style is fill between the lines. Darker shades indicate regions where the average copynumber of CA patients was higher, lighter color correspond to regions where AA mean segments were higher. A vertical line indicates the location of CHD1 on the chromosome. The fitted segment mean of the African American samples ( $\langle s_{AA} \rangle = -0.057$ , 95% CI: [-0.059, -0.055]) was almost three times lower than of the fitted mean of the European Americans ( $\langle s_{CA} \rangle = -0.167$ , 95% CI: [-0.176, -0.158])

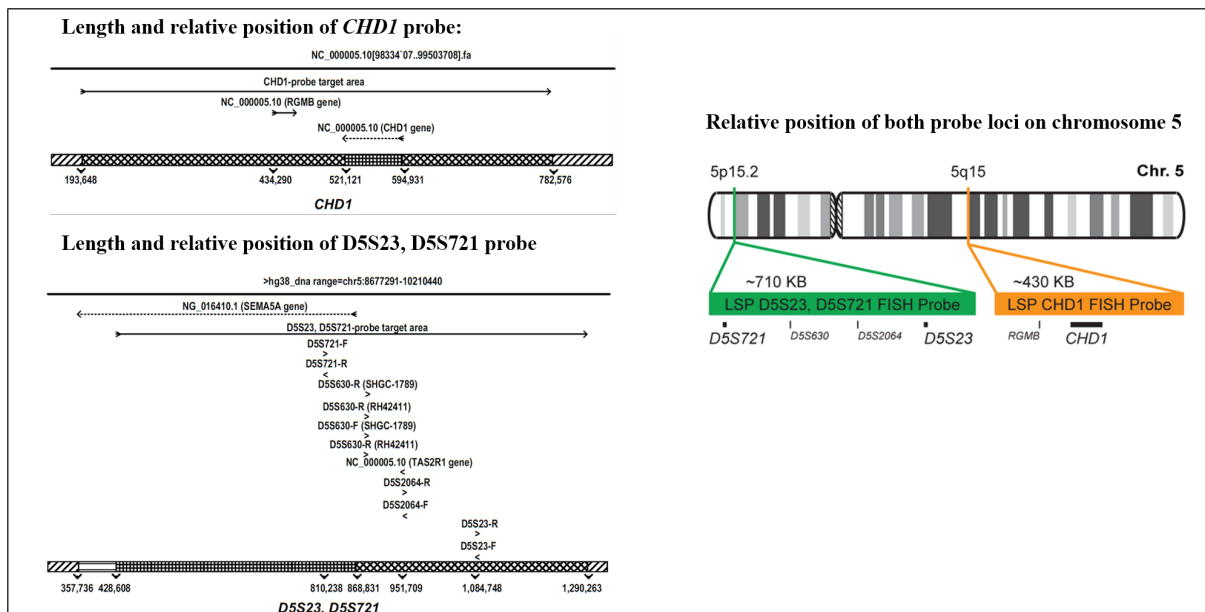

**Supplementary Figure 3:** The design strategy of FISH probes for CHD1 and chromosome 5 short arm.

a

|                                 | African American (N=91) | European American (N=109) | P value |
|---------------------------------|-------------------------|---------------------------|---------|
| <b>Age at Dignosis</b>          |                         |                           | 0.020   |
| Mean (SD)                       | 59.7 (6.6)              | 61.9 (6.2)                |         |
| Range                           | 44.8-73.2               | 45.7-74.6                 |         |
| <b>PSA at Diagnosis (ng/ml)</b> |                         |                           | 0.435   |
| <4.0                            | 7 (8.1%)                | 16 (15.5%)                |         |
| 4.0-9.0                         | 54 (62.8%)              | 63 (61.2%)                |         |
| 10.0-20.0                       | 21 (24.4%)              | 20 (19.4%)                |         |
| >20.0                           | 4 (4.7%)                | 4 (3.9%)                  |         |
| <b>Pathologic T Stage</b>       |                         |                           | 0.631   |
| pT2                             | 44 (48.4%)              | 49 (45.0%)                |         |
| pT3-4                           | 47 (51.6%)              | 60 (55.0%)                |         |
| <b>Pathologic Gleason Score</b> |                         |                           | 0.601   |
| 3+3                             | 33 (36.2%)              | 41 (37.7%)                |         |
| 3+4                             | 29 (31.9%)              | 35 (32.1%)                |         |
| 4+3                             | 10 (11.0%)              | 7 (6.4%)                  |         |
| 8 to 10                         | 16 (17.6%)              | 18 (16.5%)                |         |
| Treatment                       | 3 (3.3%)                | 8 (7.3%)                  |         |
| <b>Grade Group</b>              |                         |                           | 0.406   |
| GG1-GG2                         | 62 (68.1%)              | 76 (69.7%)                |         |
| GG3                             | 10 (11.0%)              | 7 (6.4%)                  |         |
| GG4-GG5                         | 16 (17.6%)              | 18 (16.5%)                |         |
| Treatment                       | 3 (3.3%)                | 8 (7.3%)                  |         |
| <b>Margin Status</b>            |                         |                           | 0.297   |
| Negative                        | 51 (56.0%)              | 69 (63.3%)                |         |
| Positive                        | 40 (44.0%)              | 40 (36.7%)                |         |
| <b>BCR</b>                      |                         |                           | 0.324   |
| No                              | 58 (63.7%)              | 62 (56.9%)                |         |
| Yes                             | 33 (36.3%)              | 32 (29.4%)                |         |
| <b>Metastasis</b>               |                         |                           | 0.440   |
| No                              | 81 (89.0%)              | 93 (85.3%)                |         |
| Yes                             | 10 (11.0%)              | 16 (14.7%)                |         |

b

| Patient | TMA Block | TMA Row | CORE a | CORE b | CORE c | CORE d | CORE e | CORE f | CORE g | CORE h | CORE i | CORE j | CORE k | CORE l |
|---------|-----------|---------|--------|--------|--------|--------|--------|--------|--------|--------|--------|--------|--------|--------|
| 1       | 1         | 1       | Normal | Normal | PIN    | PIN    | T1A    | T1A    | T2A    | T2A    | T3A    | T3A    | T4A    | T4A    |
| 2       | 1         | 2       | Normal | Normal | PIN    | PIN    | T1A    | T1A    | T1B    | T2A    | T2A    | T3A    |        |        |
| 3       | 1         | 3       | Normal | Normal | T1A    | T1A    | T1B    | T1B    |        |        |        |        |        |        |
| 4       | 1         | 4       | Normal | Normal | PIN    | PIN    | T1A    | T1A    | T1B    | T1B    | T2A    | T2A    |        |        |
| 5       | 1         | 5       | Normal | Normal | PIN    | PIN    | T1A    | T1A    | T1B    | T1B    |        |        |        |        |
| 6       | 1         | 6       | Normal | Normal | PIN    | PIN    | T1A    | T1A    | T1B    | T1B    | T1C    | T1C    |        |        |
| 7       | 1         | 7       | Normal | Normal | T1A    | T1A    | T2A    | T2A    | T4A    | T4A    | T7A    | T7A    |        |        |
| 8       | 1         | 8       | Normal | Normal | T1A    | T1A    | T1B    | T1B    | T2A    | T2A    | T2B    | T2B    |        |        |
| 9       | 1         | 9       | Normal | Normal | PIN    | PIN    | T1A    | T1A    | T2A    | T2A    | T3A    | T3A    | T4A    | T4A    |

c

| Race                   | Patients | Focal Tumors | Tumor Cores |
|------------------------|----------|--------------|-------------|
| AA (African American)  | 91       | 162          | 385         |
| EA (European American) | 109      | 189          | 478         |

d

|                                 | CHD1 Deletion (N=41) | No CHD1 Deletion (N=159) | P value |
|---------------------------------|----------------------|--------------------------|---------|
| <b>Pathologic T Stage</b>       |                      |                          | 0.043   |
| pT2                             | 13 (31.7%)           | 81 (50.9%)               |         |
| pT3-pT4                         | 28 (68.3%)           | 78 (49.1%)               |         |
| <b>Pathologic Gleason Score</b> |                      |                          | <0.001  |
| 3+3                             | 3 (7.3%)             | 70 (44.0%)               |         |
| 3+4                             | 17 (41.5%)           | 47 (29.6%)               |         |
| 4+3                             | 7 (17.1%)            | 10 (6.3%)                |         |
| 8 to 10                         | 11 (26.8%)           | 25 (15.7%)               |         |
| Treatment                       | 3 (7.3%)             | 7 (4.4%)                 |         |
| <b>Grade Group</b>              |                      |                          | 0.024   |
| GG1-GG2                         | 20 (48.8%)           | 117 (73.6%)              |         |
| GG3                             | 7 (17.1%)            | 10 (6.3%)                |         |
| GG4-GG5                         | 11 (26.8%)           | 25 (15.7%)               |         |
| Treatment                       | 3 (7.3%)             | 7 (4.4%)                 |         |

e

| Gene Defects       | AA (N=42)  | EA (N=59)  | P value  |
|--------------------|------------|------------|----------|
| <b>PTEN status</b> |            |            | <0.0001  |
| Deletion           | 8 (19.0%)  | 38 (64.4%) |          |
| No-deletion        | 34 (81.0%) | 21 (35.6%) |          |
| <b>ERG status</b>  |            |            | 0.000525 |
| Positive           | 9 (21.4%)  | 33 (55.9%) |          |
| Negative           | 33 (78.6%) | 26 (44.1%) |          |

**Supplementary Table 1:** a: Distributions of clinico-pathological features in combined prostate cancer cohort (N=200); b: The grid map of a representative TMA block construction (PIN=prostatic intraepithelial neoplasia, T1= index tumor; T2=secondary tumor and so on) c: Multiple tumor samples of 91 AA and 109 EA patients derived tumor TMA; d:CHD1 deletion frequency correlations with pathological T-stage, pathological Gleason score and Grade group in prostate cancer patients (N=200) e: Frequency of PTEN deletion and expression of ERG protein in a subset of the cohort (N=101, AA=42 and CA=59).

**Supplementary Figure 4: a:** The discordance map of CHD1 deletion vs. PTEN deletion and ERG expression in TMA cores carrying CHD1 deletion (purple, AA cases 1 to 12 and 6 EA cases 43-48). Samples from benign tissue are marked in CORE a and b. T1-IN indicates index, T2-NIN marks secondary tumors and so on, in TMA cores c to i. Patient codes are shown in the Case column **b:** The discordance map of CHD1 deletion, PTEN deletion and ERG expression at patient level. Patient codes are shown in the Case column.

a

|      | Case | Race | CORE a | CORE b | CORE c | CORE d | CORE e | CORE f | CORE g | CORE h | CORE i | CORE j | CORE k | CORE i | BCR | Met |                        |
|------|------|------|--------|--------|--------|--------|--------|--------|--------|--------|--------|--------|--------|--------|-----|-----|------------------------|
| PTEN | 1    | AA   |        |        |        |        | T1-IN  | T1-IN  |        |        | T2-NIN | T2-NIN |        |        | Y   | N   | PTEN deletion          |
| ERG  | 1    | AA   |        |        |        |        | T1-IN  | T1-IN  |        |        | T2-NIN | T2-NIN |        |        | Y   | N   | ERG expression         |
| CHD1 | 1    | AA   |        |        |        |        | T1-IN  | T1-IN  |        |        | T2-NIN | T2-NIN |        |        | Y   | N   | CHD1 deletion          |
| PTEN | 2    | AA   |        |        |        |        |        | T1-IN  |        |        |        |        |        |        | Y   | N   | No defect              |
| ERG  | 2    | AA   |        |        |        |        |        |        |        |        |        |        |        |        | Y   | N   | Benign                 |
| CHD1 | 2    | AA   |        |        |        |        | T1-IN  |        | T2-NIN |        |        |        |        |        | Y   | N   | T1-IN Index Tumor      |
| PTEN | 3    | AA   |        |        |        |        | T1-IN  | T1-IN  |        |        |        |        |        |        | Y   | N   | T2-NIN Secondary Tumor |
| ERG  | 3    | AA   |        |        |        |        |        |        |        |        |        |        |        |        | Y   | N   | T3-NIN Tertial Tumor   |
| CHD1 | 3    | AA   |        |        |        |        | T1-IN  | T1-IN  |        | T2-NIN | T2-NIN | T2-NIN |        |        | Y   | N   | Y Yes, BCR             |
| PTEN | 4    | AA   |        |        |        |        | T1-IN  | T1-IN  | T2-NIN |        |        |        |        |        | Y   | N   | Y Yes, Met             |
| ERG  | 4    | AA   |        |        |        |        |        |        |        |        |        |        |        |        | Y   | N   | N No BCR/Met           |
| CHD1 | 4    | AA   |        |        |        |        |        |        |        |        | T3-NIN |        |        |        | Y   | N   |                        |
| PTEN | 5    | AA   |        |        |        |        |        |        |        |        |        |        |        |        | Y   | Y   |                        |
| ERG  | 5    | AA   |        |        |        |        |        |        | T1-IN  |        |        |        |        |        | Y   | Y   |                        |
| CHD1 | 5    | AA   |        |        |        |        |        |        | T1-IN  | T1-IN  |        |        |        |        | Y   | Y   |                        |
| PTEN | 6    | AA   |        |        |        |        |        |        |        |        |        |        |        |        | Y   | Y   |                        |
| ERG  | 6    | AA   |        |        |        |        |        |        |        |        |        |        |        |        | Y   | Y   |                        |
| CHD1 | 6    | AA   |        |        |        |        |        |        | T1-IN  | T1-IN  |        |        |        |        | Y   | Y   |                        |
| PTEN | 7    | AA   |        |        |        |        |        |        |        |        |        |        |        |        | Y   | N   |                        |
| ERG  | 7    | AA   |        |        |        |        |        |        |        |        |        |        |        |        | Y   | N   |                        |
| CHD1 | 7    | AA   |        |        |        | T1-IN  |        |        |        |        | T1-IN  |        |        |        | Y   | N   |                        |
| PTEN | 8    | AA   |        |        |        |        |        |        |        |        |        |        |        |        | Y   | N   |                        |
| ERG  | 8    | AA   |        |        |        |        |        |        |        |        |        |        |        |        | Y   | N   |                        |
| CHD1 | 8    | AA   |        |        |        |        |        |        |        | T2-NIN |        |        |        |        | Y   | N   |                        |
| PTEN | 9    | AA   |        |        |        |        |        |        |        |        |        |        |        |        | Y   | N   |                        |
| ERG  | 9    | AA   |        |        |        |        |        |        |        |        |        |        |        |        | Y   | N   |                        |
| CHD1 | 9    | AA   |        |        |        |        | T1-IN  | T1-IN  |        |        |        |        |        |        | Y   | N   |                        |
| PTEN | 10   | AA   |        |        |        |        |        |        |        |        |        |        |        |        | Y   | N   |                        |
| ERG  | 10   | AA   |        |        |        |        |        |        |        |        |        |        |        |        | Y   | N   |                        |
| CHD1 | 10   | AA   |        |        |        |        |        |        | T1-IN  |        |        |        |        |        | Y   | N   |                        |
| PTEN | 11   | AA   |        |        |        |        |        |        |        |        |        |        |        |        | Y   | N   |                        |
| ERG  | 11   | AA   |        |        |        |        |        |        |        |        |        |        |        |        | N   | N   |                        |
| CHD1 | 11   | AA   |        |        |        |        |        | T1-IN  | T1-IN  | T1-IN  |        |        |        |        | N   | N   |                        |
| PTEN | 12   | AA   |        |        |        |        |        |        |        |        |        |        |        |        | N   | N   |                        |
| ERG  | 12   | AA   |        |        |        |        |        |        |        |        |        |        |        |        | N   | N   |                        |
| CHD1 | 12   | AA   |        |        |        |        |        |        | T1-IN  | T1-IN  |        |        |        |        | N   | N   |                        |

  

| Case | Race | CORE a | CORE b | CORE c | CORE d | CORE e | CORE f | CORE g | CORE h | CORE i | CORE j | CORE k | CORE i | BCR | Met |
|------|------|--------|--------|--------|--------|--------|--------|--------|--------|--------|--------|--------|--------|-----|-----|
| PTEN | 43   | EA     |        |        |        | T1-IN  | T1-IN  | T1-IN  | T1-IN  | T1-IN  | T2-NIN | T2-NIN |        | Y   | Y   |
| ERG  | 43   | EA     |        |        |        | T1-IN  | T1-IN  | T1-IN  | T1-IN  | T1-IN  | T2-NIN | T2-NIN |        | Y   | Y   |
| CHD1 | 43   | EA     |        |        |        | T1-IN  |        |        |        |        |        |        |        | Y   | Y   |
| PTEN | 44   | EA     |        |        | T1-IN  | T1-IN  |        | T1-IN  |        | T1-IN  |        |        |        | Y   | Y   |
| ERG  | 44   | EA     |        |        | T1-IN  | T1-IN  |        | T1-IN  |        | T1-IN  |        |        |        | Y   | Y   |
| CHD1 | 44   | EA     |        |        |        |        |        | T1-IN  | T1-IN  |        |        |        |        | Y   | Y   |
| PTEN | 45   | EA     |        |        |        |        | T1-IN  | T1-IN  |        | T1-IN  |        |        |        | Y   | N   |
| ERG  | 45   | EA     |        |        |        |        | T1-IN  | T1-IN  |        |        |        |        |        | Y   | N   |
| CHD1 | 45   | EA     |        |        |        |        |        | T1-IN  |        | T1-IN  |        |        |        | Y   | N   |
| PTEN | 46   | EA     |        |        |        |        |        |        | T2-NIN |        |        |        |        | N   | N   |
| ERG  | 46   | EA     |        |        | T1-IN  |        |        |        |        |        |        |        |        | N   | N   |
| CHD1 | 46   | EA     |        |        |        |        |        |        | T2-NIN | T2-NIN |        |        |        | N   | N   |
| PTEN | 47   | EA     |        |        |        |        | T1-IN  | T1-IN  | T1-IN  | T1-IN  | T2-NIN |        |        | Y   | N   |
| ERG  | 47   | EA     |        |        |        |        |        |        |        |        |        |        |        | Y   | N   |
| CHD1 | 47   | EA     |        |        |        |        |        |        | T1-IN  |        |        |        |        | Y   | N   |
| PTEN | 48   | EA     |        |        |        |        |        |        |        |        |        |        |        | N   | N   |
| ERG  | 48   | EA     |        |        |        |        |        |        |        |        |        |        |        | N   | N   |
| CHD1 | 48   | EA     |        |        | T1-IN  |        | T1-IN  | T1-IN  | T1-IN  |        |        |        |        | N   | N   |



b

| Case | Race | CHD1 | PTEN | ERG | BCR | Met | Case | Race | CHD1 | PTEN | ERG | BCR | Met |
|------|------|------|------|-----|-----|-----|------|------|------|------|-----|-----|-----|
| 1    | AA   |      |      |     | Y   | N   | 43   | EA   |      |      |     | Y   | Y   |
| 2    | AA   |      |      |     | Y   | N   | 44   | EA   |      |      |     | Y   | Y   |
| 3    | AA   |      |      |     | Y   | N   | 45   | EA   |      |      |     | Y   | N   |
| 4    | AA   |      |      |     | Y   | N   | 46   | EA   |      |      |     | N   | N   |
| 5    | AA   |      |      |     | Y   | Y   | 47   | EA   |      |      |     | Y   | N   |
| 6    | AA   |      |      |     | Y   | Y   | 48   | EA   |      |      |     | N   | N   |
| 7    | AA   |      |      |     | Y   | N   | 49   | EA   |      |      |     | Y   | Y   |
| 8    | AA   |      |      |     | Y   | N   | 50   | EA   |      |      |     | Y   | Y   |
| 9    | AA   |      |      |     | Y   | N   | 51   | EA   |      |      |     | Y   | Y   |
| 10   | AA   |      |      |     | Y   | N   | 52   | EA   |      |      |     | Y   | Y   |
| 11   | AA   |      |      |     | N   | N   | 53   | EA   |      |      |     | Y   | N   |
| 12   | AA   |      |      |     | N   | N   | 54   | EA   |      |      |     | Y   | N   |
| 13   | AA   |      |      |     | Y   | N   | 55   | EA   |      |      |     | Y   | N   |
| 14   | AA   |      |      |     | N   | N   | 56   | EA   |      |      |     | Y   | N   |
| 15   | AA   |      |      |     | Y   | N   | 57   | EA   |      |      |     | Y   | N   |
| 16   | AA   |      |      |     | N   | N   | 58   | EA   |      |      |     | N   | N   |
| 17   | AA   |      |      |     | Y   | Y   | 59   | EA   |      |      |     | N   | N   |
| 18   | AA   |      |      |     | Y   | Y   | 60   | EA   |      |      |     | N   | N   |
| 19   | AA   |      |      |     | Y   | N   | 61   | EA   |      |      |     | N   | N   |
| 20   | AA   |      |      |     | Y   | N   | 62   | EA   |      |      |     | N   | N   |
| 21   | AA   |      |      |     | Y   | N   | 63   | EA   |      |      |     | N   | N   |
| 22   | AA   |      |      |     | Y   | Y   | 64   | EA   |      |      |     | N   | N   |
| 23   | AA   |      |      |     | Y   | Y   | 65   | EA   |      |      |     | N   | N   |
| 24   | AA   |      |      |     | Y   | N   | 66   | EA   |      |      |     | N   | N   |
| 25   | AA   |      |      |     | Y   | N   | 67   | EA   |      |      |     | N   | N   |
| 26   | AA   |      |      |     | Y   | N   | 68   | EA   |      |      |     | Y   | N   |
| 27   | AA   |      |      |     | Y   | N   | 69   | EA   |      |      |     | Y   | N   |
| 28   | AA   |      |      |     | Y   | N   | 70   | EA   |      |      |     | Y   | N   |
| 29   | AA   |      |      |     | N   | N   | 71   | EA   |      |      |     | Y   | N   |
| 30   | AA   |      |      |     | N   | N   | 72   | EA   |      |      |     | Y   | N   |
| 31   | AA   |      |      |     | N   | N   | 73   | EA   |      |      |     | Y   | N   |
| 32   | AA   |      |      |     | N   | N   | 74   | EA   |      |      |     | Y   | N   |
| 33   | AA   |      |      |     | N   | N   | 75   | EA   |      |      |     | Y   | N   |
| 34   | AA   |      |      |     | N   | N   | 76   | EA   |      |      |     | Y   | N   |
| 35   | AA   |      |      |     | N   | N   | 77   | EA   |      |      |     | N   | Y   |
| 36   | AA   |      |      |     | N   | N   | 78   | EA   |      |      |     | N   | N   |
| 37   | AA   |      |      |     | N   | N   | 79   | EA   |      |      |     | N   | N   |
| 38   | AA   |      |      |     | N   | N   | 80   | EA   |      |      |     | N   | N   |
| 39   | AA   |      |      |     | N   | N   | 81   | EA   |      |      |     | N   | N   |
| 40   | AA   |      |      |     | N   | N   | 82   | EA   |      |      |     | Y   | N   |
| 41   | AA   |      |      |     | N   | N   | 83   | EA   |      |      |     | Y   | N   |
| 42   | AA   |      |      |     | N   | N   | 84   | EA   |      |      |     | N   | N   |
|      |      |      |      |     |     |     | 85   | EA   |      |      |     | N   | N   |
|      |      |      |      |     |     |     | 86   | EA   |      |      |     | N   | N   |
|      |      |      |      |     |     |     | 87   | EA   |      |      |     | N   | N   |
|      |      |      |      |     |     |     | 88   | EA   |      |      |     | N   | N   |
|      |      |      |      |     |     |     | 89   | EA   |      |      |     | N   | N   |
|      |      |      |      |     |     |     | 90   | EA   |      |      |     | N   | N   |
|      |      |      |      |     |     |     | 91   | EA   |      |      |     | N   | N   |
|      |      |      |      |     |     |     | 92   | EA   |      |      |     | Y   | Y   |
|      |      |      |      |     |     |     | 93   | EA   |      |      |     | Y   | N   |
|      |      |      |      |     |     |     | 94   | EA   |      |      |     | Y   | N   |
|      |      |      |      |     |     |     | 95   | EA   |      |      |     | Y   | N   |
|      |      |      |      |     |     |     | 96   | EA   |      |      |     | Y   | N   |
|      |      |      |      |     |     |     | 97   | EA   |      |      |     | Y   | N   |
|      |      |      |      |     |     |     | 98   | EA   |      |      |     | Y   | N   |
|      |      |      |      |     |     |     | 99   | EA   |      |      |     | N   | N   |
|      |      |      |      |     |     |     | 100  | EA   |      |      |     | N   | N   |
|      |      |      |      |     |     |     | 101  | EA   |      |      |     | N   | N   |

|   |                |
|---|----------------|
|   | PTEN deletion  |
|   | ERG expression |
|   | CHD1 deletion  |
|   | No defect      |
|   | Benign         |
| Y | Yes, BCR       |
| Y | Yes, Met       |
| N | No BCR/Met     |

**Supplementary Figure 5:** **a:** Univariable survival analysis of the clinical features associated with BCR (N=189, excluding 11 patients receiving neo-adjuvant therapy). **b:** Association between CHD1 deletion and BCR in all (AA and EA) and EA only prostate cancer patients. **c:** Univariable survival analysis of the clinical features associated with metastasis (N=189, excluding 11 patients receiving neo-adjuvant therapy). **d:** Association between CHD1 deletion and metastasis in all and EA prostate cancer patients.

**a**

| Covariate            | Level             | N   | Hazard Ratio (95% CI) | Time_RP_BCR      |                    | Log-rank P value |
|----------------------|-------------------|-----|-----------------------|------------------|--------------------|------------------|
|                      |                   |     |                       | HR P value       | Assumption P value |                  |
| <b>CHD1 deletion</b> | <b>Deletion</b>   | 37  | 2.80 (1.72-4.57)      | <b>&lt;0.001</b> | 0.193              | <b>&lt;0.001</b> |
|                      | No Deletion       | 152 |                       |                  |                    |                  |
| Race                 | European American | 101 | 1.38 (0.88-2.19)      | 0.164            | 0.285              | 0.162            |
|                      | African American  | 88  |                       |                  |                    |                  |
| Path T Stage         | <b>pT3-pT4</b>    | 104 | 5.58 (3.23-9.62)      | <b>&lt;0.001</b> | 0.218              | <b>&lt;0.001</b> |
|                      | pT2               | 85  |                       |                  |                    |                  |
| GG cat               | <b>GG4-GG5</b>    | 40  | 2.30 (1.38-3.83)      | <b>0.001</b>     | 0.421              | <b>&lt;0.001</b> |
|                      | GG1-GG3           | 149 |                       |                  |                    |                  |
| Path Gleason         | <b>8 to 10</b>    | 34  | 3.83 (1.92-7.66)      | <b>&lt;0.001</b> | 0.449              | <b>&lt;0.001</b> |
|                      | 4+3               | 17  | 4.86 (2.29-10.34)     | <b>&lt;0.001</b> |                    |                  |
|                      | 3+4               | 64  | 2.41 (1.35-4.30)      | <b>0.003</b>     |                    |                  |
|                      | 3+3               | 74  |                       |                  |                    |                  |
| Surgical Margin      | <b>Positive</b>   | 76  | 3.80 (2.39-6.04)      | <b>&lt;0.001</b> | 0.313              | <b>&lt;0.001</b> |
|                      | Negative          | 113 |                       |                  |                    |                  |
| Age at Diagnosis     |                   | 189 | 1.03 (0.99-1.06)      | 0.142            | 0.154              |                  |
| PSA at Diagnosis     |                   | 178 | 1.42 (0.99-2.03)      | 0.059            | 0.433              |                  |

**b**

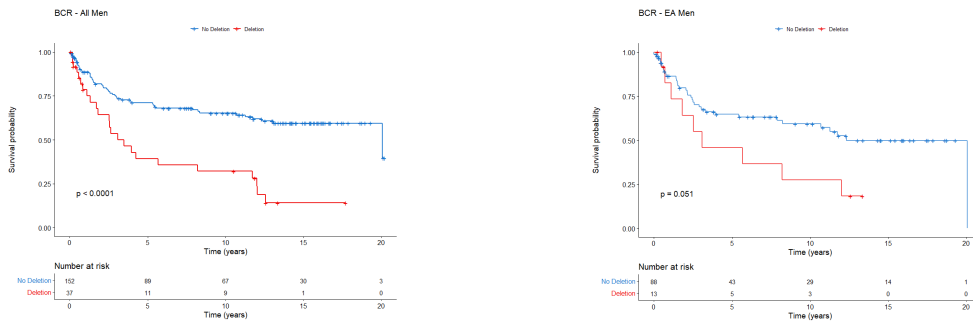

|                                        | HR  | P value      | CI. Lower. HR | CI. upper. HR |
|----------------------------------------|-----|--------------|---------------|---------------|
| <b>CHD1 Deletion vs No Deletion</b>    | 2.1 | <b>0.012</b> | 1.2           | 3.7           |
| Age at Diagnosis                       | 1.0 | 0.992        | 1.0           | 1.0           |
| Race EA vs AA                          | 1.4 | 0.194        | 0.8           | 2.4           |
| Diagnosis PSA                          | 1.4 | 0.106        | 0.9           | 2.0           |
| Pathological Stage pT3-pT4 vs pT2      | 3.0 | 0.003        | 1.4           | 6.1           |
| GG4-GG5 vs GG1-GG3                     | 1.3 | 0.350        | 0.7           | 2.4           |
| Surgical Margin (positive vs negative) | 1.4 | 0.261        | 0.8           | 2.6           |

|                                        | HR  | P value      | CI. Lower. HR | CI. upper. HR |
|----------------------------------------|-----|--------------|---------------|---------------|
| <b>CHD1 Deletion vs No Deletion</b>    | 1.9 | <b>0.032</b> | 1.1           | 3.5           |
| Age at Diagnosis                       | 1.0 | 0.801        | 1.0           | 1.0           |
| Race EA vs AA                          | 1.4 | 0.260        | 0.8           | 2.3           |
| Diagnosis PSA                          | 1.4 | 0.084        | 1.0           | 2.1           |
| Pathological Stage pT3-pT4 vs pT2      | 3.1 | 0.002        | 1.5           | 6.5           |
| Pathological Gleason 3+4 vs 3+3        | 1.2 | 0.629        | 0.6           | 2.3           |
| Pathological Gleason 4+3 vs 3+3        | 2.6 | 0.029        | 1.1           | 5.9           |
| Pathological Gleason 8-10 vs 3+3       | 2   | 0.092        | 0.9           | 4.3           |
| Surgical Margin (positive vs negative) | 1.4 | 0.314        | 0.7           | 2.5           |

**c**

| Covariate               | Level                    | N   | Hazard Ratio (95% CI) | HR P value   | Assumption P value | Log-rank P value |
|-------------------------|--------------------------|-----|-----------------------|--------------|--------------------|------------------|
| <b>CHD1 deletion</b>    | <b>Deletion</b>          | 37  | 2.99 (1.33-6.75)      | <b>0.008</b> | 0.466              | <b>0.005</b>     |
|                         | <b>No Deletion</b>       | 152 |                       |              |                    |                  |
| <b>Race</b>             | <b>European American</b> | 101 | 1.45 (0.65-3.22)      | 0.367        | 0.199              | 0.364            |
|                         | <b>African American</b>  | 88  |                       |              |                    |                  |
| <b>Path T Stage</b>     | <b>pT3-pT4</b>           | 104 | 4.48 (1.53-13.05)     | <b>0.006</b> | 0.405              | <b>0.003</b>     |
|                         | <b>pT2</b>               | 85  |                       |              |                    |                  |
| <b>GG cat</b>           | <b>GG4-GG5</b>           | 40  | 3.04 (1.36-6.82)      | <b>0.007</b> | 0.252              | <b>0.005</b>     |
|                         | <b>GG1-GG3</b>           | 149 |                       |              |                    |                  |
| <b>Path Gleason</b>     | <b>8 to 10</b>           | 34  | 5.30 (1.83-15.34)     | <b>0.002</b> | 0.286              | <b>0.002</b>     |
|                         | <b>4+3</b>               | 17  | 1.90 (0.37-9.85)      | 0.443        |                    |                  |
|                         | <b>3+4</b>               | 64  | 1.40 (0.44-4.40)      | 0.57         |                    |                  |
|                         | <b>3+3</b>               | 74  |                       |              |                    |                  |
| <b>Surgical Margin</b>  | <b>Positive</b>          | 76  | 2.76 (1.22-6.26)      | <b>0.015</b> | 0.375              | <b>0.011</b>     |
|                         | <b>Negative</b>          | 113 |                       |              |                    |                  |
| <b>Age at Diagnosis</b> |                          | 189 | 1.06 (0.99-1.13)      | 0.094        | 0.213              |                  |
| <b>PSA at Diagnosis</b> |                          | 178 | 1.03 (0.54-1.97)      | 0.923        | 0.785              |                  |

**d**

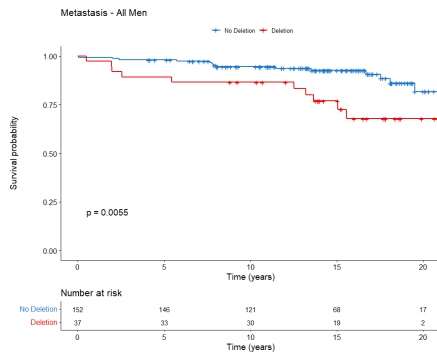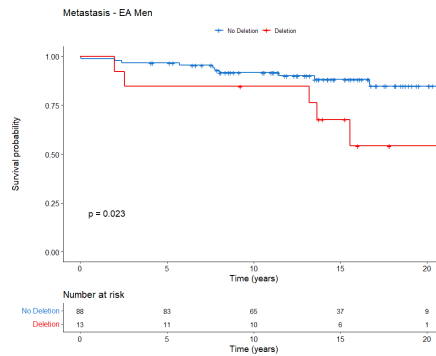

|                                               | HR  | P value      | CI. Lower. HR | CI. upper. HR |
|-----------------------------------------------|-----|--------------|---------------|---------------|
| <b>CHD1 Deletion vs No Deletion</b>           | 2.8 | <b>0.032</b> | 1.1           | 7.2           |
| <b>Age at Diagnosis</b>                       | 1.0 | 0.340        | 1.0           | 1.1           |
| <b>Race EA vs AA</b>                          | 1.6 | 0.372        | 0.6           | 4.2           |
| <b>Diagnosis PSA</b>                          | 0.8 | 0.452        | 0.4           | 1.6           |
| <b>Pathological Stage pT3-pT4 vs pT2</b>      | 1.9 | 0.328        | 0.5           | 7.1           |
| <b>GG4-GG5 vs GG1-GG3</b>                     | 1.6 | 0.295        | 0.6           | 4.3           |
| <b>Surgical Margin (positive vs negative)</b> | 2.2 | 0.157        | 0.7           | 6.4           |

|                                               | HR  | P value      | CI. Lower. HR | CI. upper. HR |
|-----------------------------------------------|-----|--------------|---------------|---------------|
| <b>CHD1 Deletion vs No Deletion</b>           | 2.6 | <b>0.048</b> | 1.0           | 6.9           |
| <b>Age at Diagnosis</b>                       | 1.0 | 0.341        | 1.0           | 1.1           |
| <b>Race CA vs AA</b>                          | 1.2 | 0.671        | 0.5           | 3.4           |
| <b>Diagnosis PSA</b>                          | 0.7 | 0.306        | 0.3           | 1.4           |
| <b>Pathological Stage pT3-pT4 vs pT2</b>      | 1.8 | 0.380        | 0.5           | 6.9           |
| <b>Pathological Gleason 3+4 vs 3+3</b>        | 0.9 | 0.849        | 0.2           | 3.4           |
| <b>Pathological Gleason 4+3 vs 3+3</b>        | 0.9 | 0.911        | 0.1           | 5.5           |
| <b>Pathological Gleason 8-10 vs 3+3</b>       | 2.7 | 0.125        | 0.8           | 10.1          |
| <b>Surgical Margin (positive vs negative)</b> | 1.9 | 0.239        | 0.6           | 5.6           |

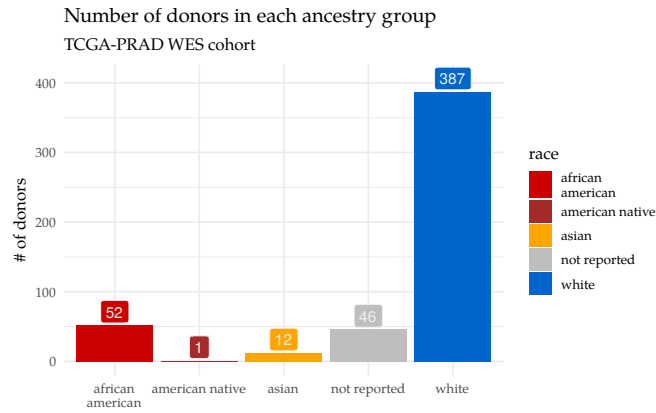

**Supplementary Figure 6:** Distribution of the self-declared ancestries within the TCGA WES dataset.

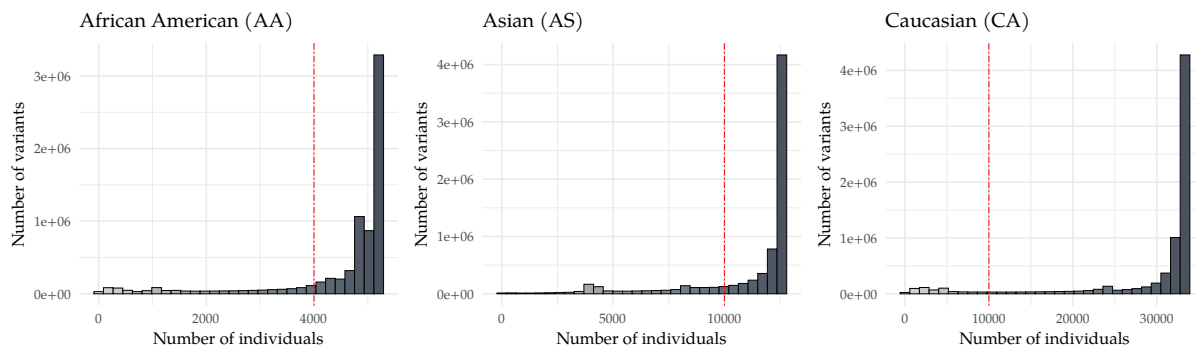

**Supplementary Figure 7:** Distributions of the number of individuals supporting SNPs in the ExAC database in each ancestry group. The red dashed vertical lines represent a threshold, below which the variants were excluded from the search.

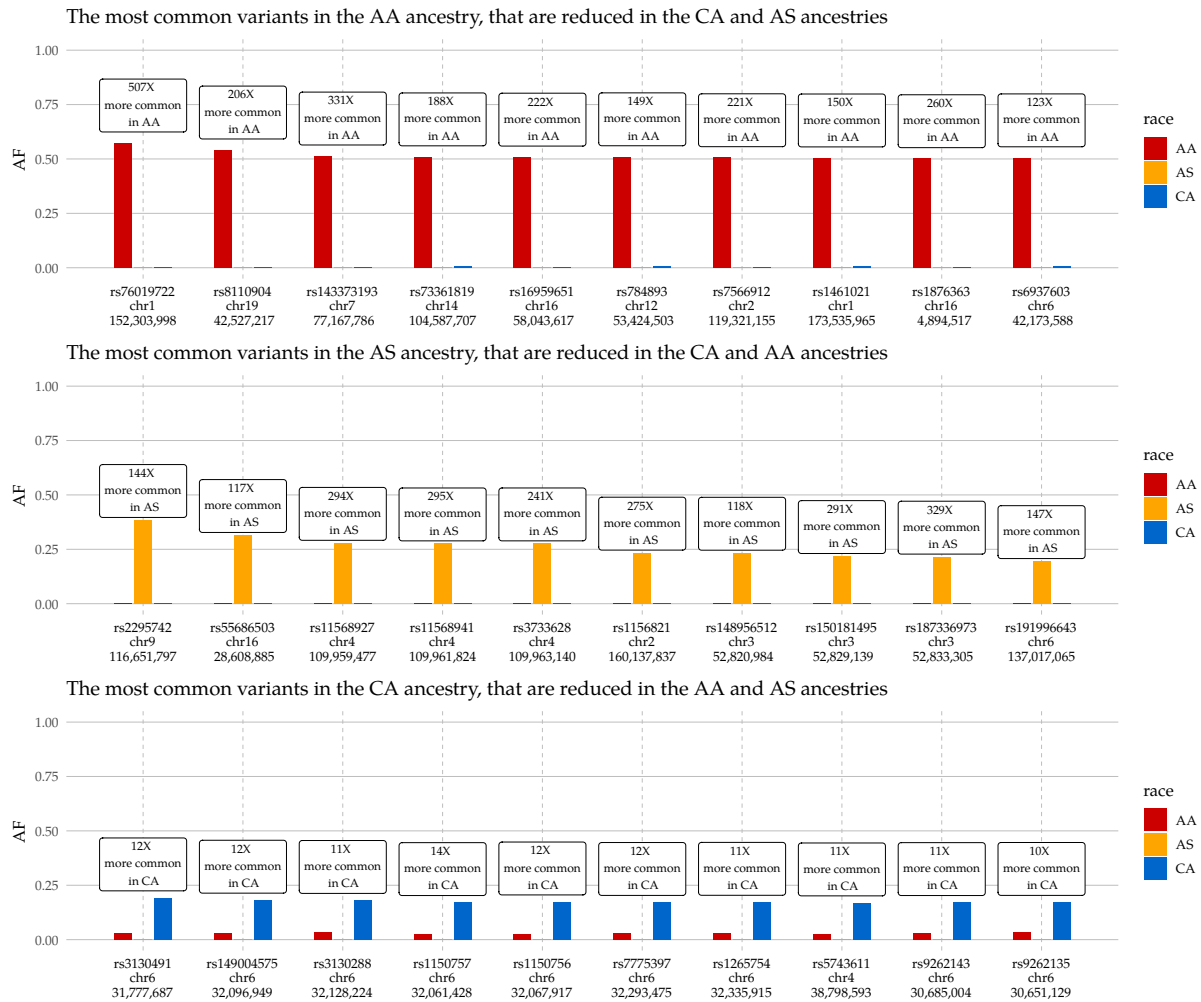

**Supplementary Figure 8:** The ten most ancestry-specific SNPs of the three most frequent WES ancestry groups. The relative commonness of each SNP was compared to the mean of the population allele frequencies (AF) of the other two ancestries.

Approximate number of germline mutations in each sample per kb

Based on 3000, 10kb long genomic segments

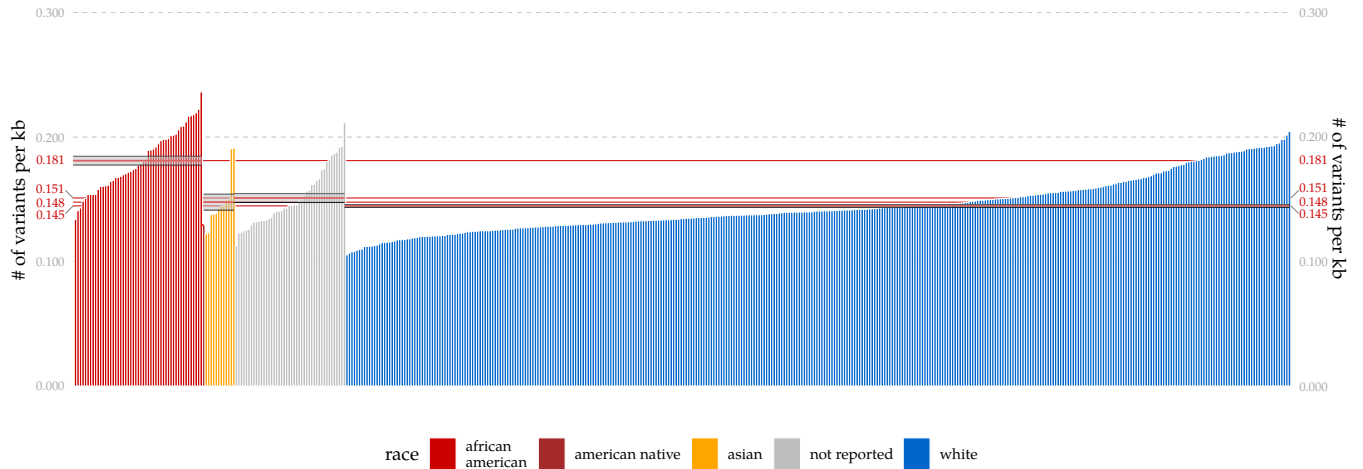

**Supplementary Figure 9:** Frequencies of the exonic germline mutations within the PRAD-US whole exomes, grouped by the self-reported or not-reported ancestries.

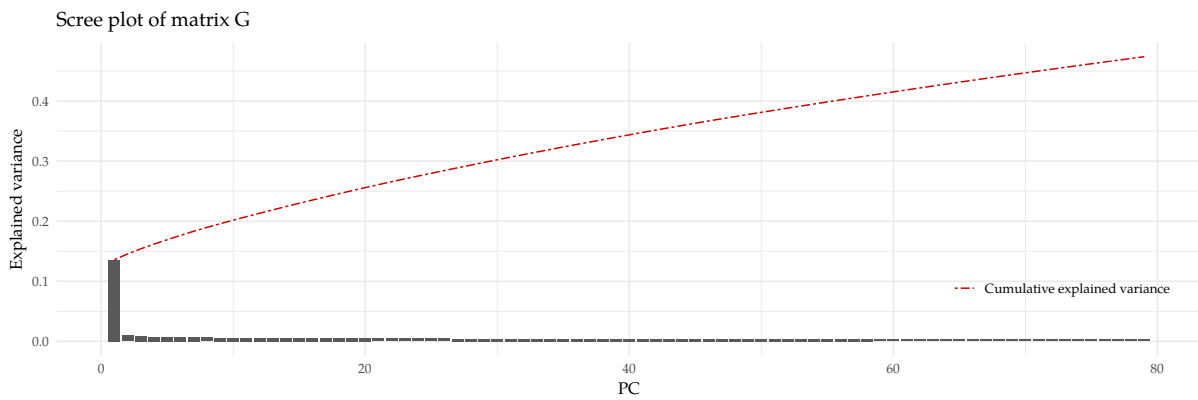

**Supplementary Figure 10:** Scree plot of the ancestry-genotype matrix G

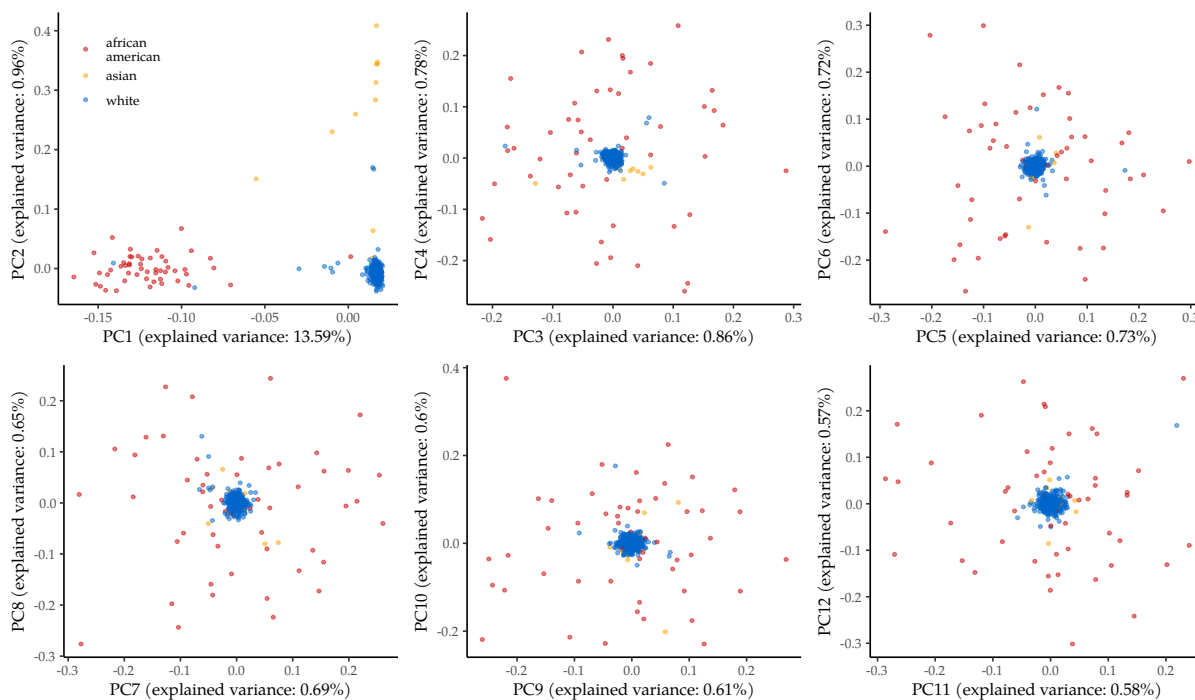

**Supplementary Figure 11:** Projection of the ancestry genotype matrix onto its first few principal components.

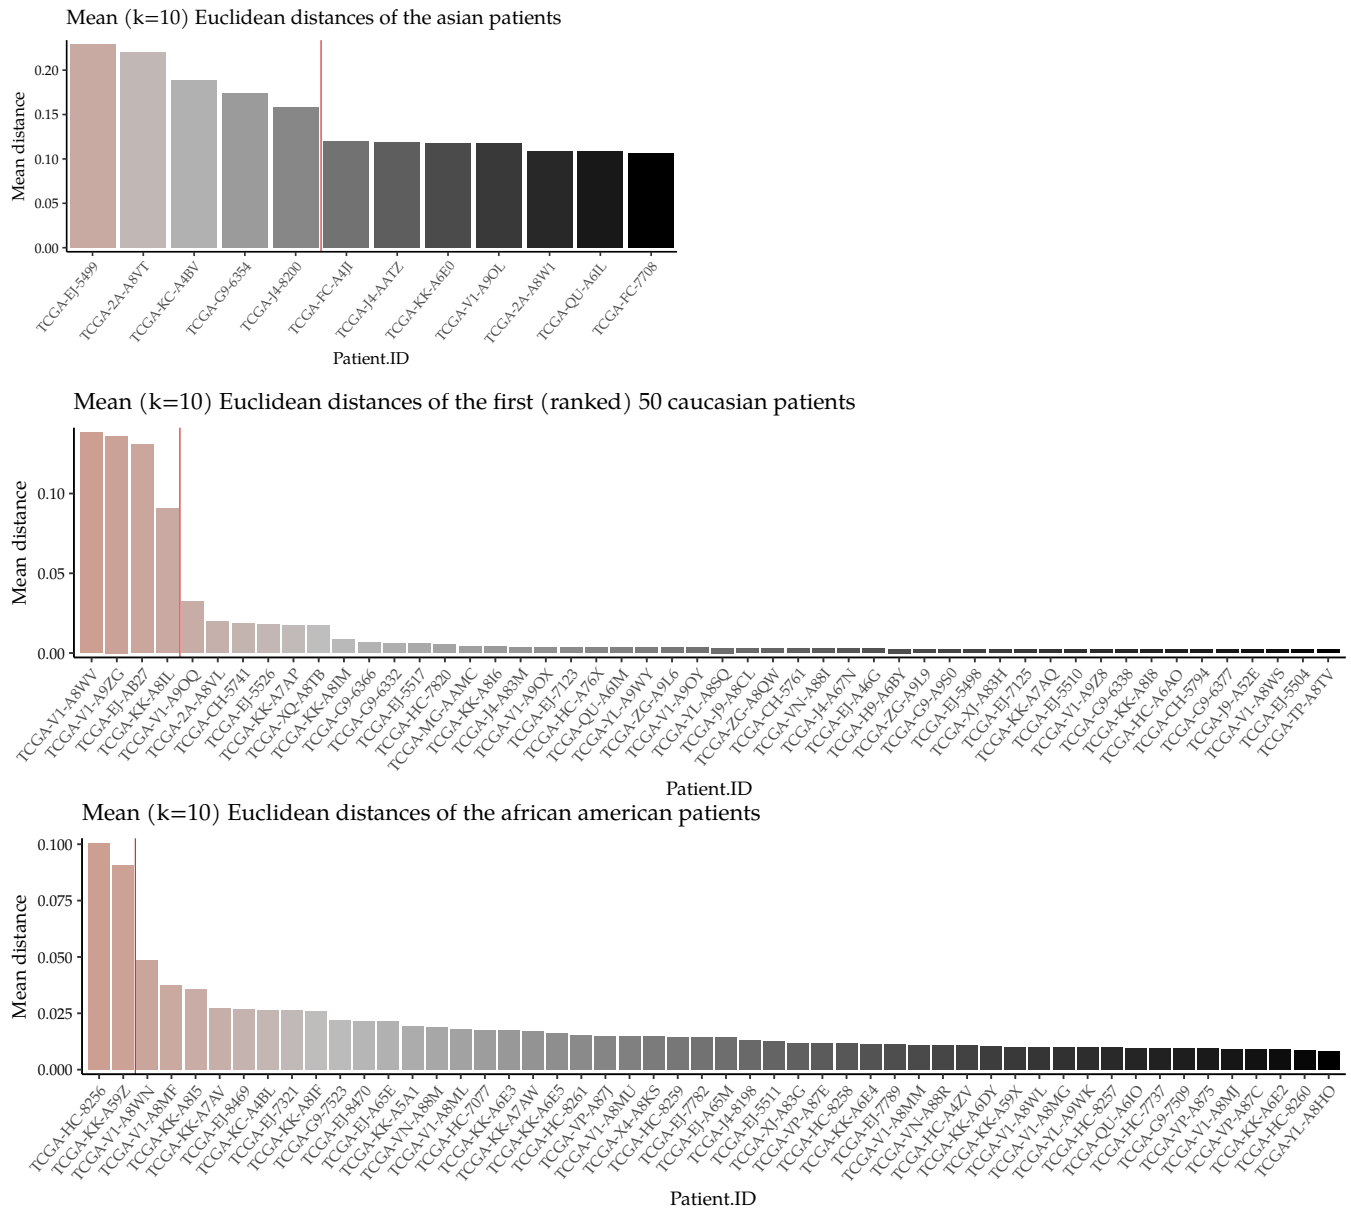

**Supplementary Figure 12:** Euclidean mean distances in the PC1-PC2 space. Large mean distances indicate, that the sample is located further from its cluster than the rest of the members of that group. Red vertical lines indicate the thresholds that were used for outlier detection. The ancestry of samples left from the threshold were reclassified as "outliers". These samples were excluded from the training process introduced in the next section.



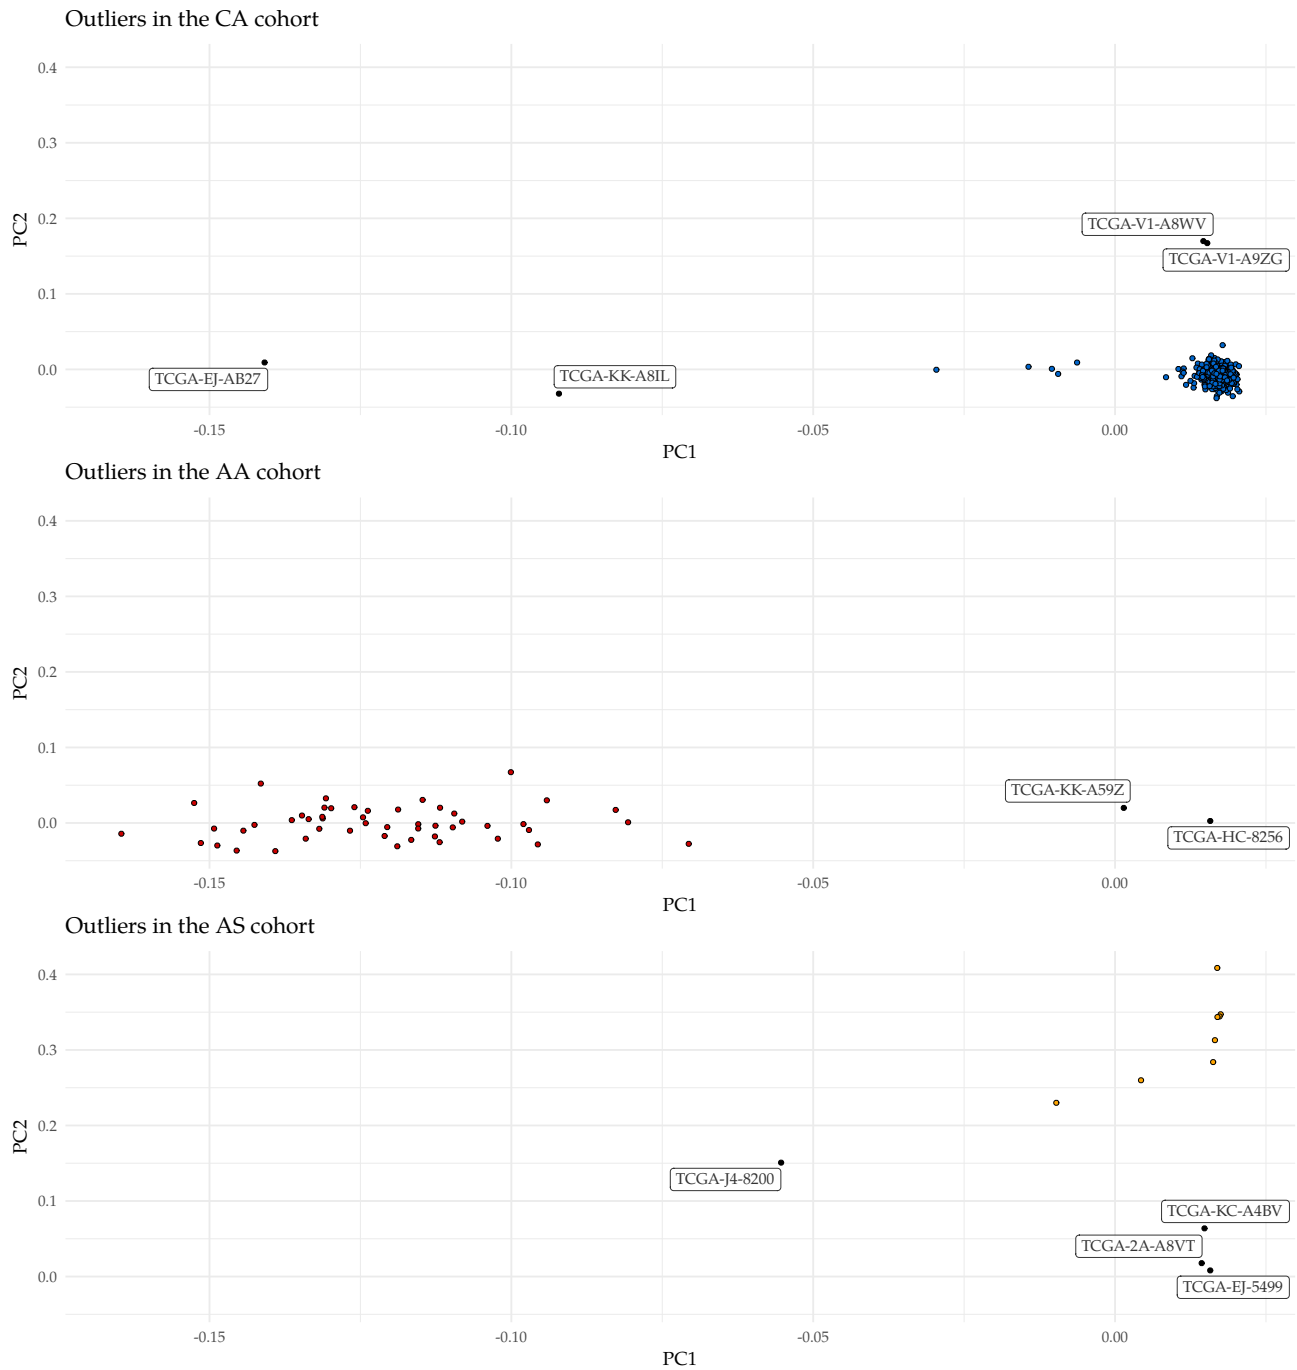

**Supplementary Figure 13:** Outliers of the three ancestries. From top panel to the bottom, **European American**, **African American**, and **Asian American** ancestries. Samples that have not deviated from their main cluster significantly are colored according to the color-code of their ancestry, while clear outliers are colored black. The TCGA submitter IDs of these samples are also indicated on the figure.

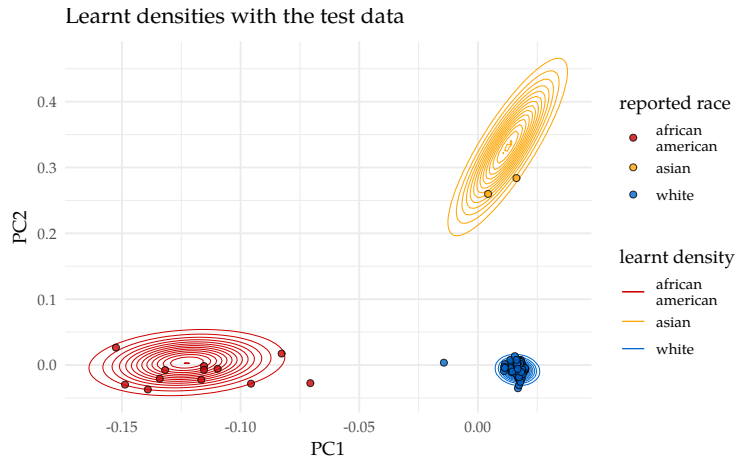

**Supplementary Figure 14:** Learnt distributions of the ancestries in the PC1-PC2 space of the genotype matrix. Samples of the test set are also represented in the figure, colored by their original, self-declared ancestries.

Predictions on the evaluation set

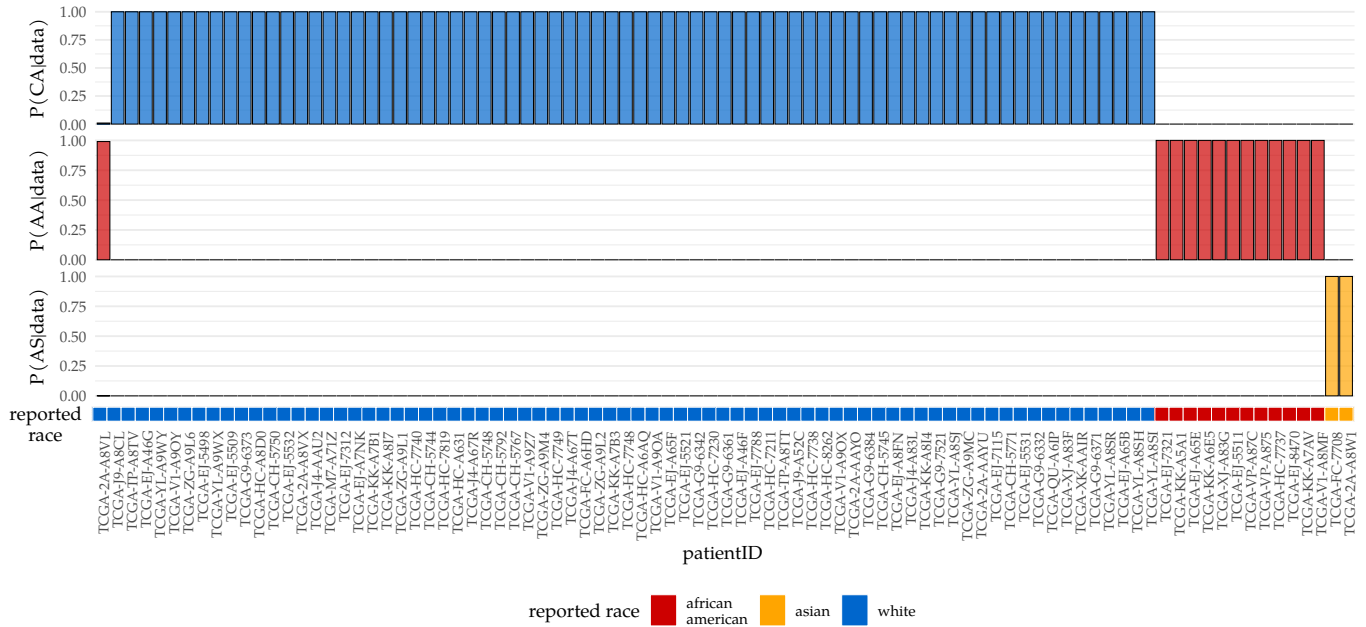

**Supplementary Figure 15:** Predicted probabilities of samples of the test set. The reported, i.e. self-declared ancestries are also illustrated under the bar plots.

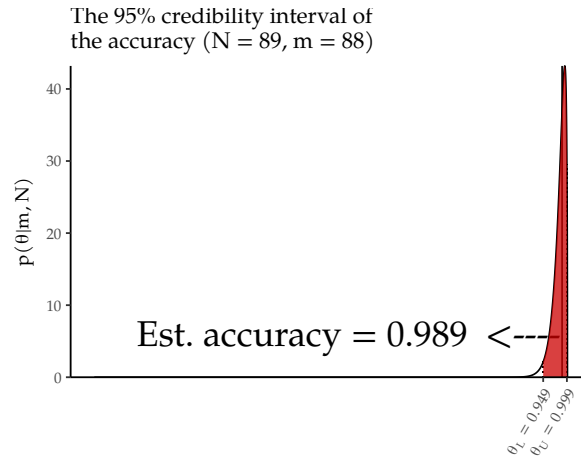

**Supplementary Figure 16:** Estimated Accuracy ( $\theta$ ) of the Bayes classifier. The 95% credibility interval was estimated using a binomial distribution of  $N = 89$  trials and  $m = 88$  successes.

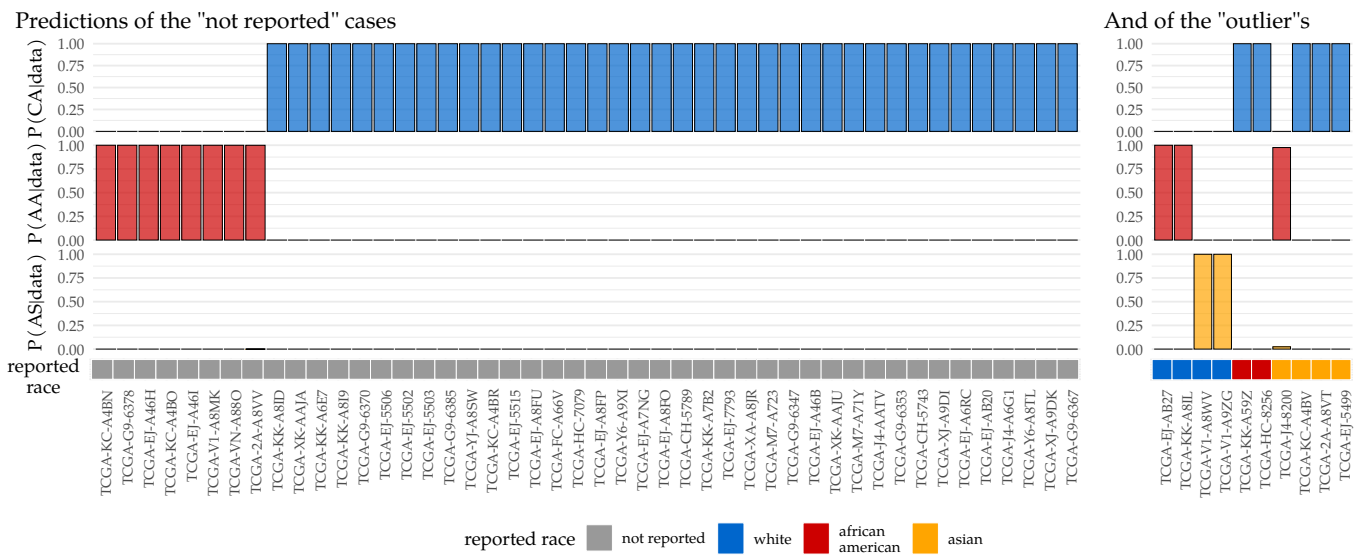

**Supplementary Figure 17:** Predicted probabilities of samples of the "outlier" and "not reported" samples. The reported, i.e. self-declared ancestries are also illustrated under the bar plots.

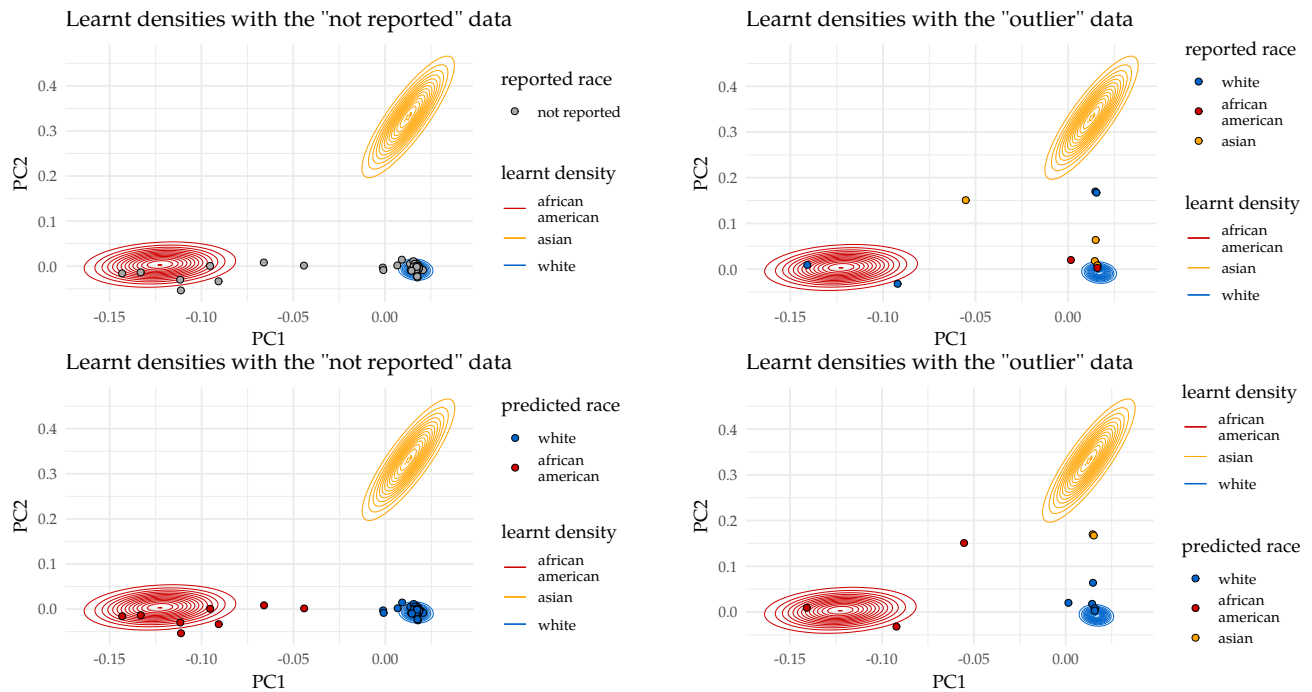

**Supplementary Figure 18:** Learnt distributions of the ancestries in the PC1-PC2 space of the genotype matrix. Samples of the "not reported" and "outlier" sets are also represented in the figures, in the top two figures they are colored according to their original, self-declared ancestries, while in the bottom two figures they are colored according to their reclassified ancestries.

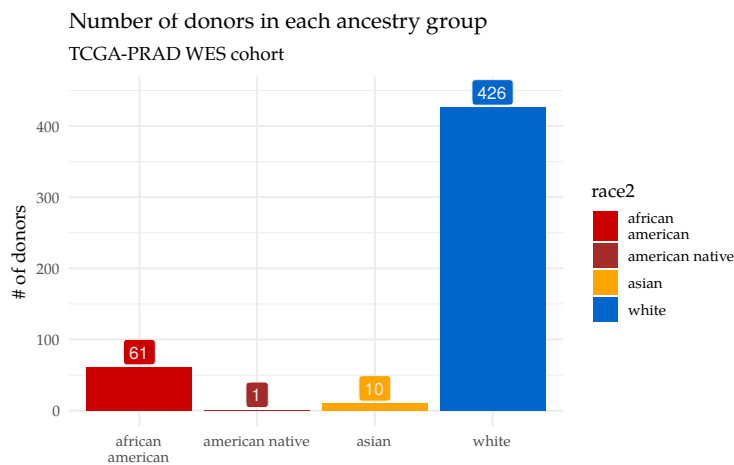

**Supplementary Figure 19:** Final distribution of the validated ancestries in the TCGA WES dataset

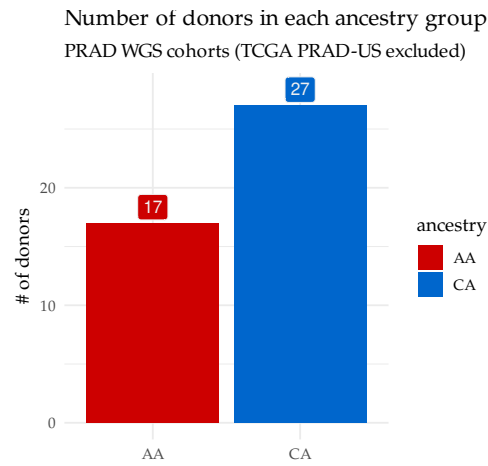

**Supplementary Figure 20:** Number of patients with AA/CA self-declared ancestries among the PRAD WGS samples. As the 20 TCGA donors have been analyzed in the whole exome section, they were not involved in the WGS section.

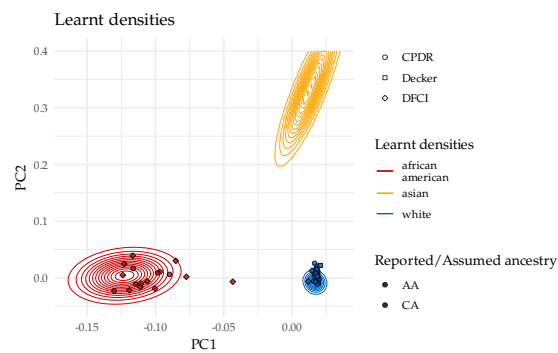

**Supplementary Figure 21:** Distribution of the self-declared ancestries of the PRAD WGS samples. As the 20 TCGA donors have been already analyzed in the whole exome section, they were not included in the WGS section.

## Ancestry predictions of the WGS samples

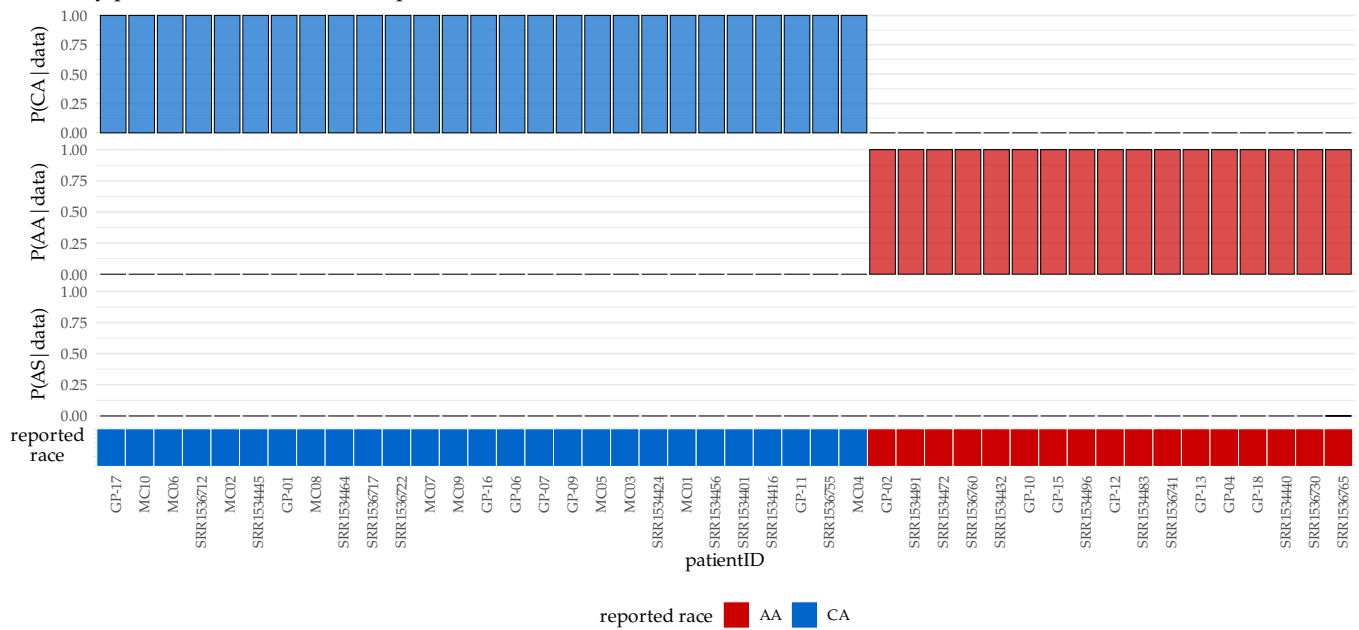

**Supplementary Figure 22:** Predicted probabilities of samples of the "outlier" and "not reported" samples. The reported, i.e. self-declared ancestries are also illustrated under the bar plots.

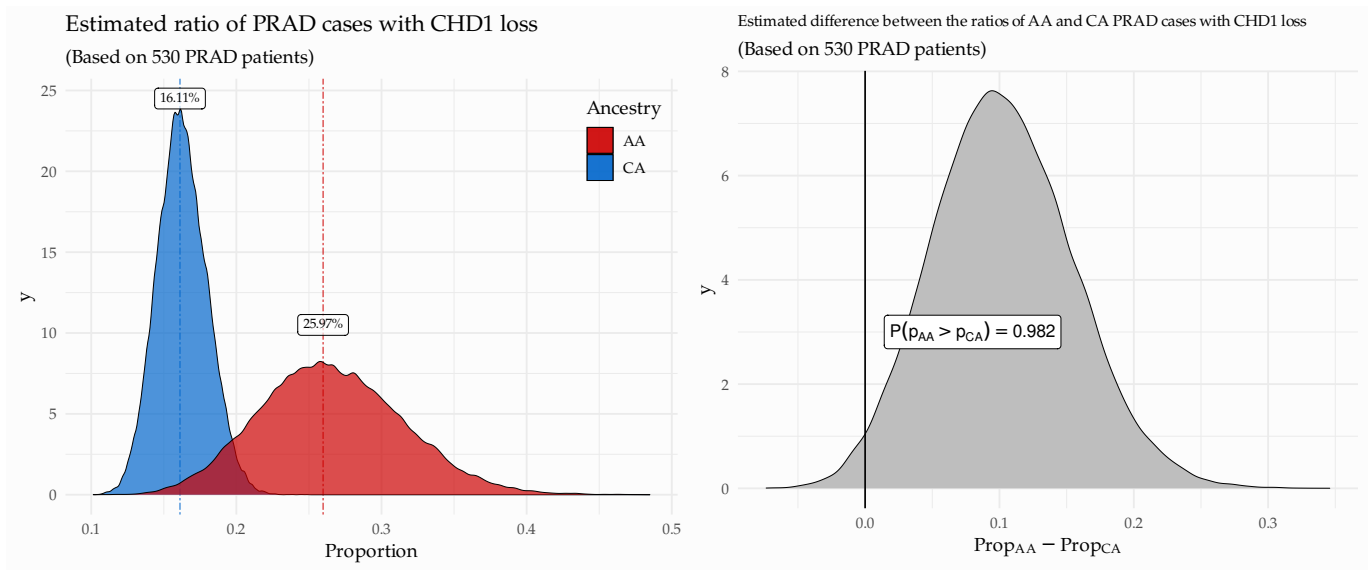

**Supplementary Figure 23:** On the left: The estimated distributions of the prevalence of CHD1 loss cases in AA and CA PRAD cases. The figure illustrates the likely range of the true ratio of CHD1-loss in AA and CA tumors in the greater population.

On the right: The difference of the two posteriors  $Prop_{AA} - Prop_{CA}$ .

Supplementary Figure 24: Genotyping of genes involved in DNA repair in the NGS dataset.

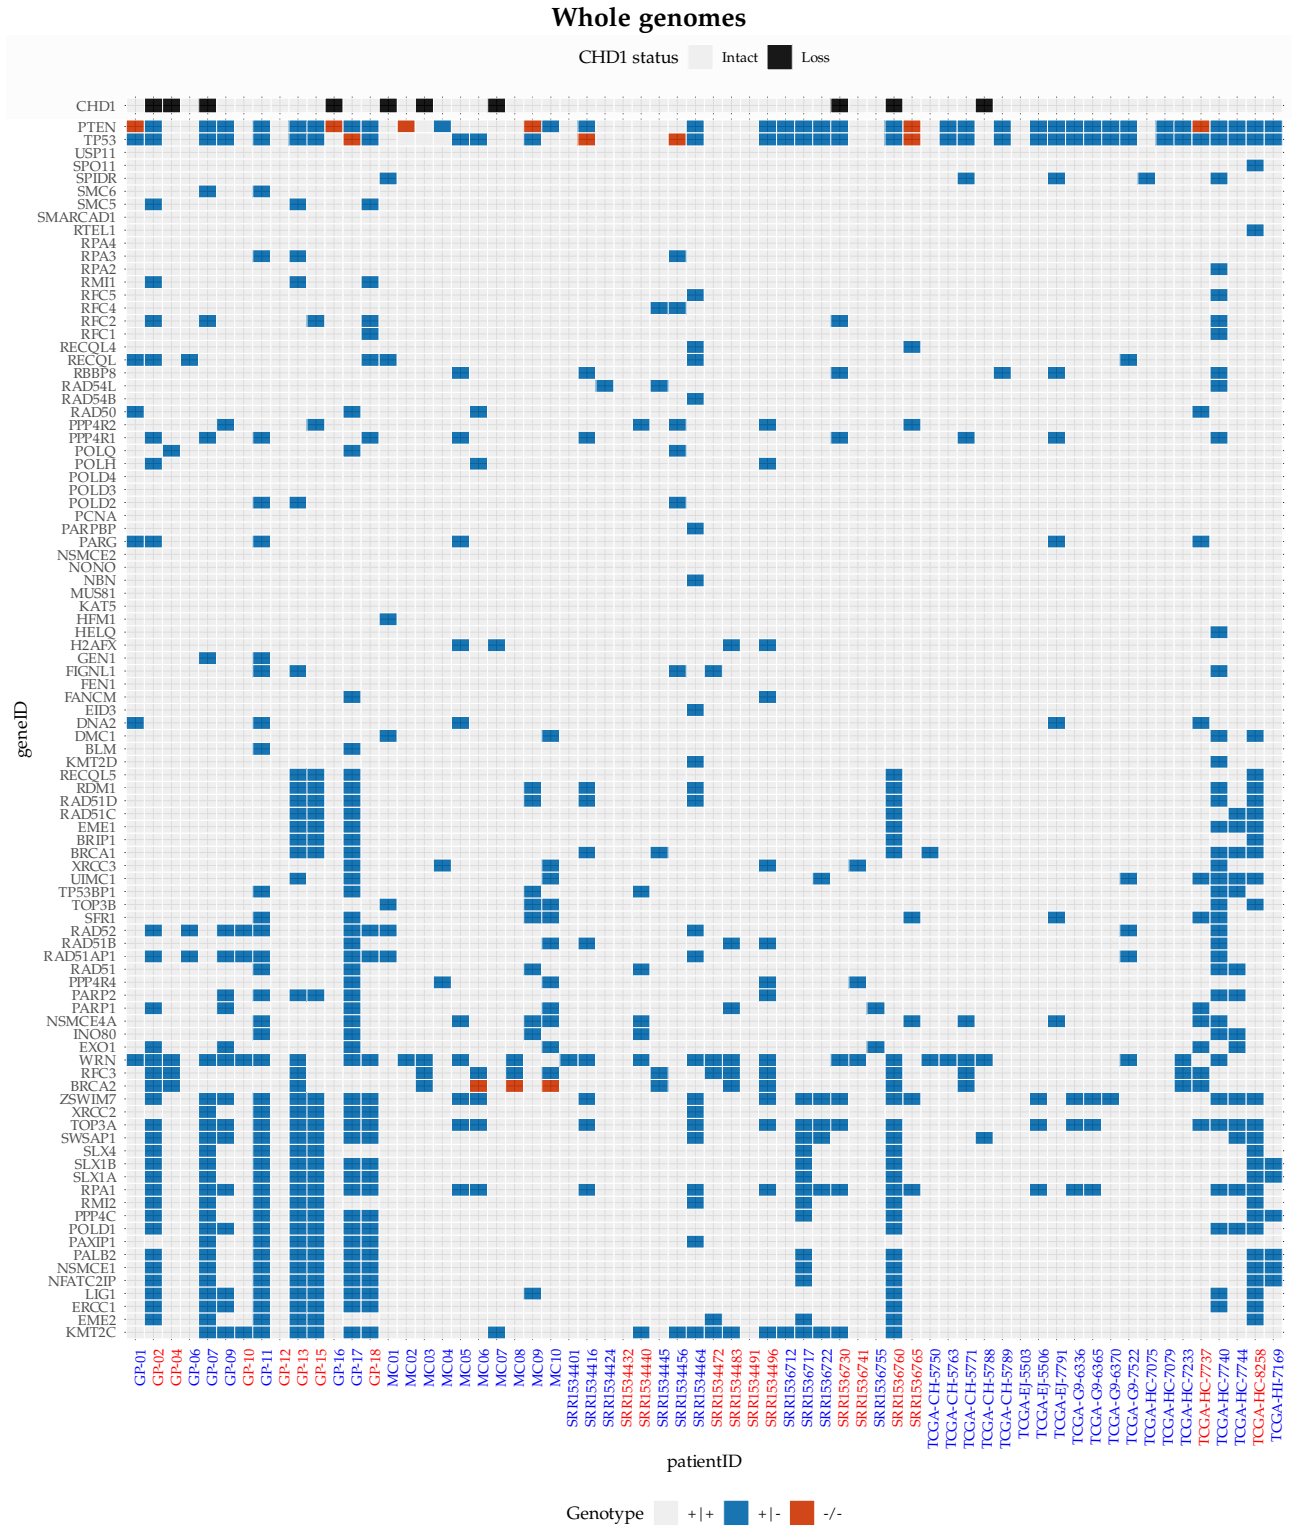



### TCGA whole exomes

Genotypes of the TCGA PRAD whole exomes  
Every ancestry combined

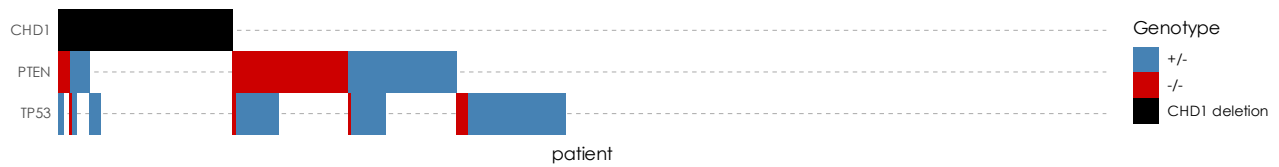

Genotypes of the TCGA PRAD whole exomes  
AA cases only

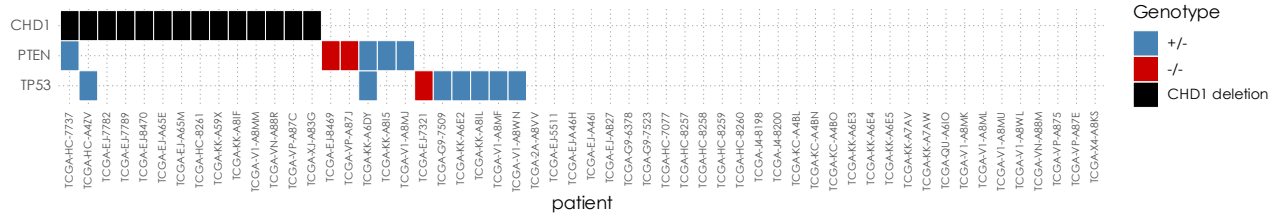

Genotypes of the TCGA PRAD whole exomes  
EA cases only

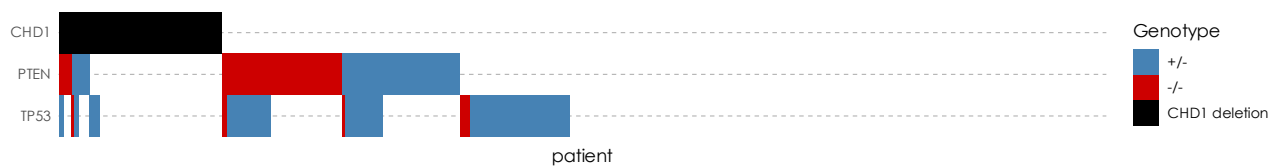

**Supplementary Figure 25:** Illustrations of the LOH calling procedure on the CHD1-loss whole genomes. Each sample has its own figure set: the top panel shows the coverage and spatial distribution of the heterozygous SNPs around CHD1 in the sample, with a grey box around those that were included in the LOH analysis. The figure also indicates the mean coverage over the entire tumor genome (blue line) and the average coverage in the displayed region (red line). The bottom panel shows the various observed AF-distribution as histograms, and the theoretical distributions that are expected if the deletion is homozygous or heterozygous. The final probabilities that infer whether the observed AF-distribution in the tumor above and around CHD1 result from an LOH or not are also displayed. The error bars indicate the 95% percentile intervals of 1000 bootstrap iterations.

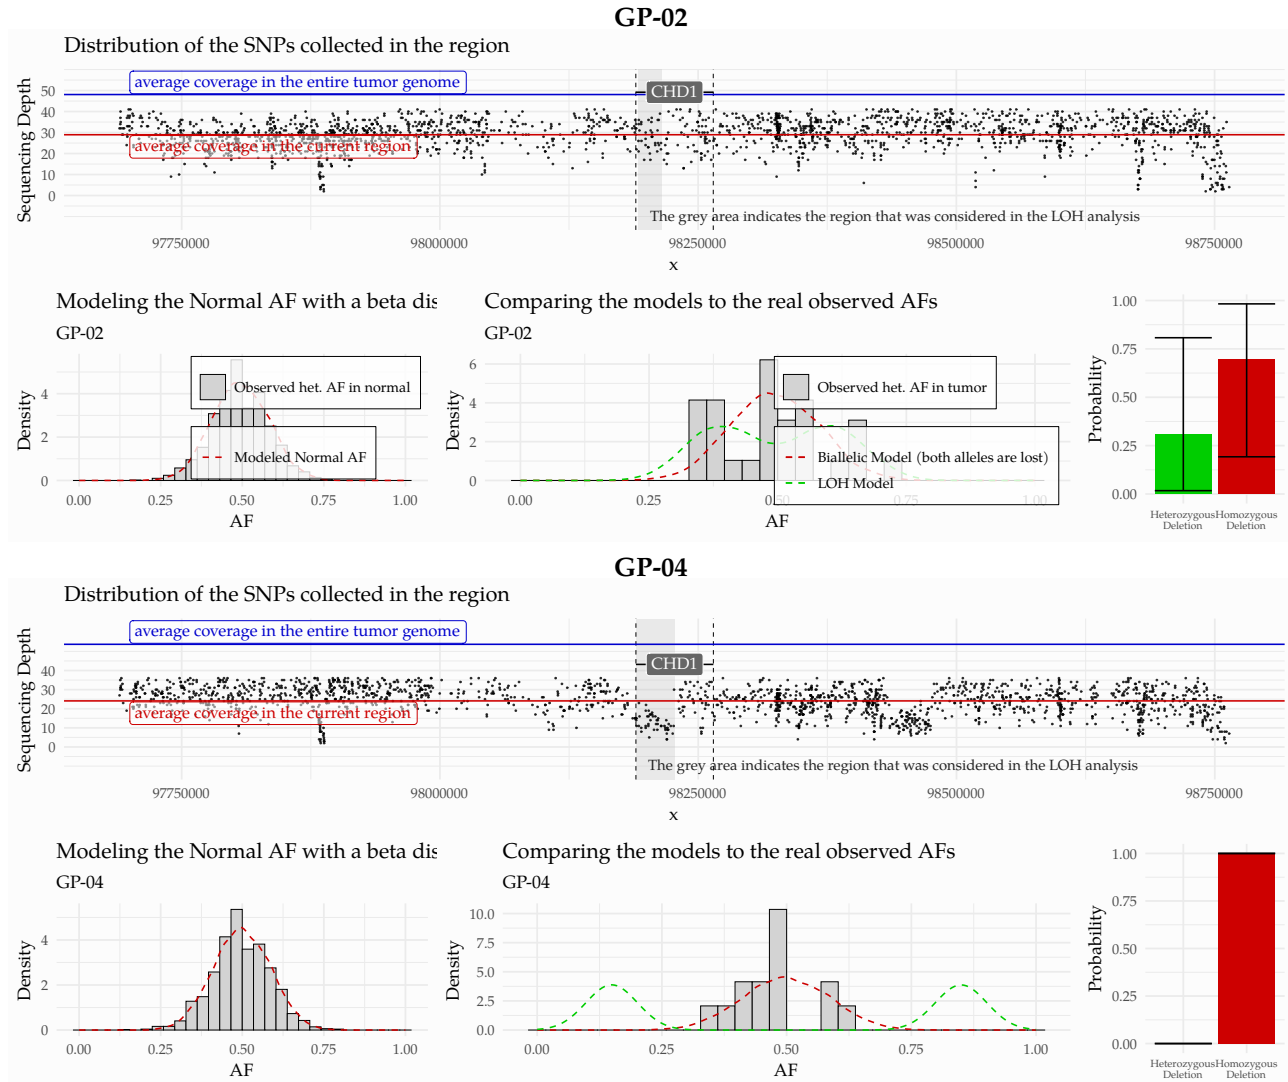

GP-07

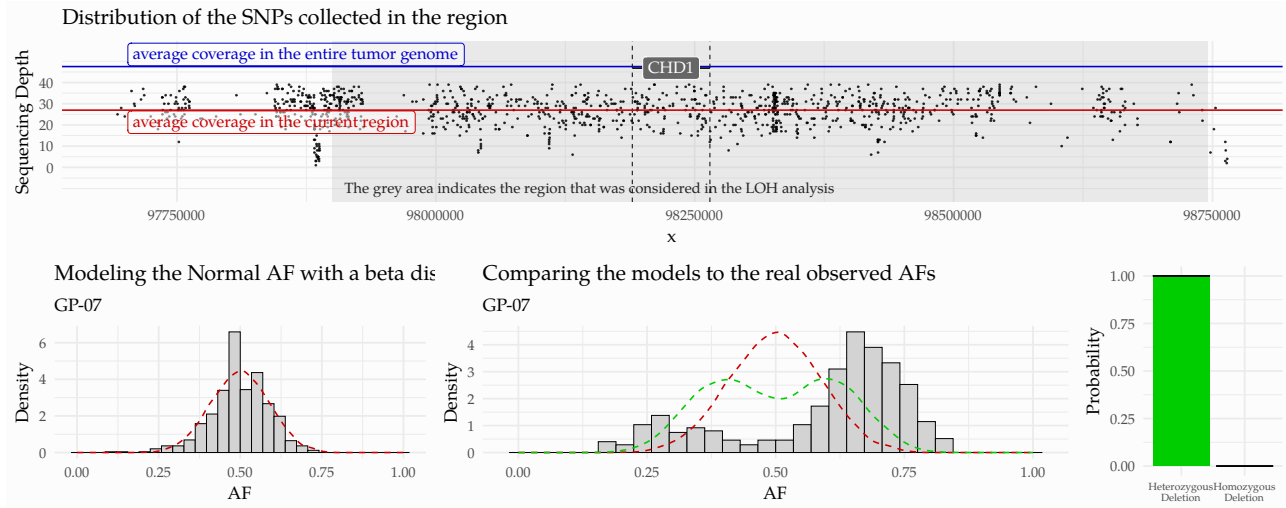

GP-16

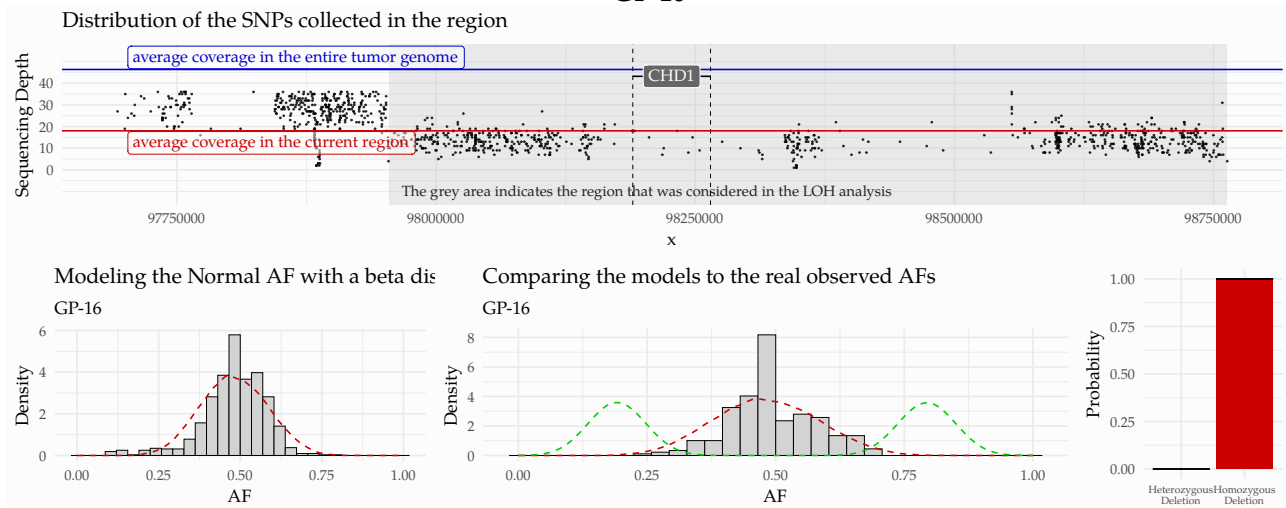

MC01

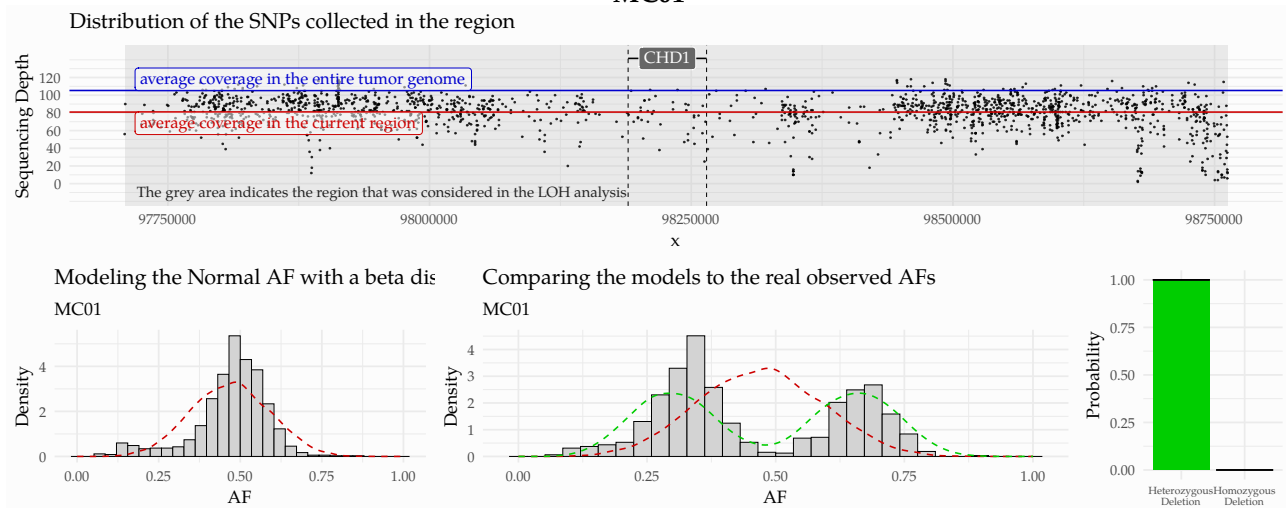

MC03

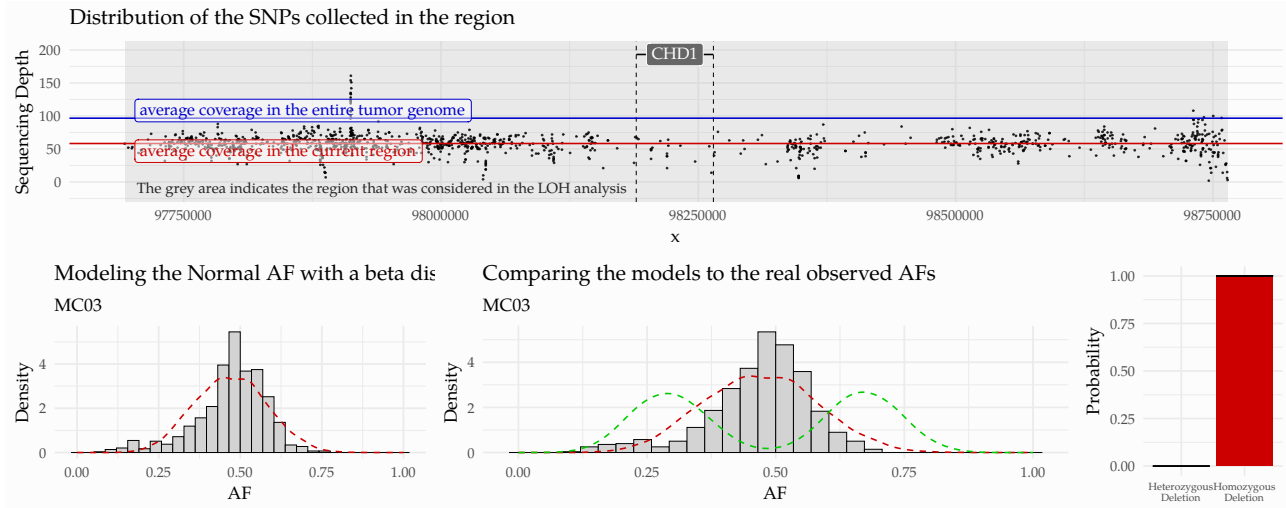

MC06

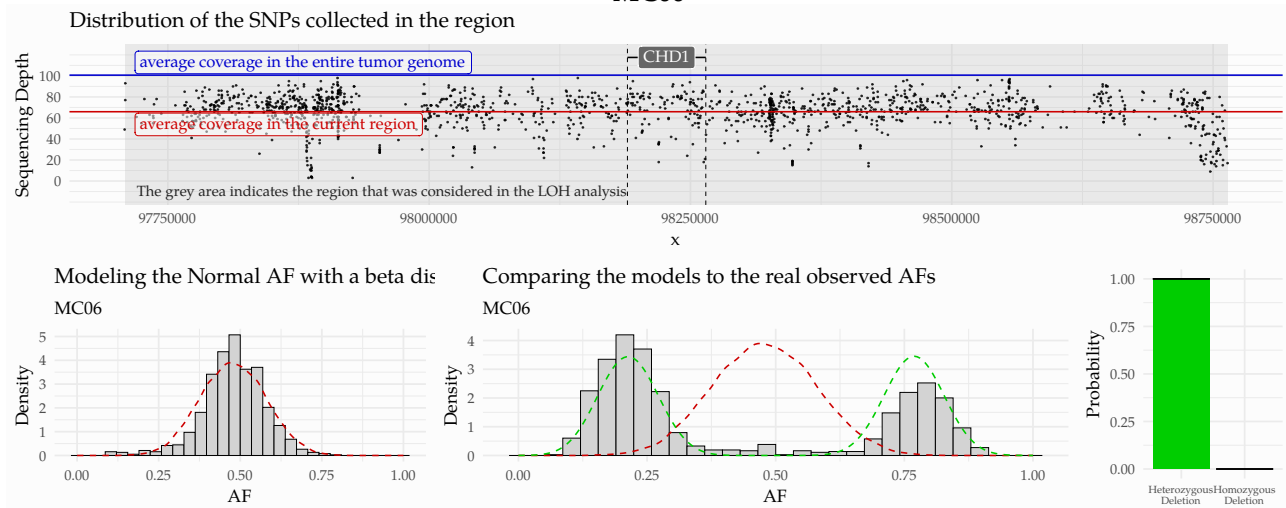

MC07

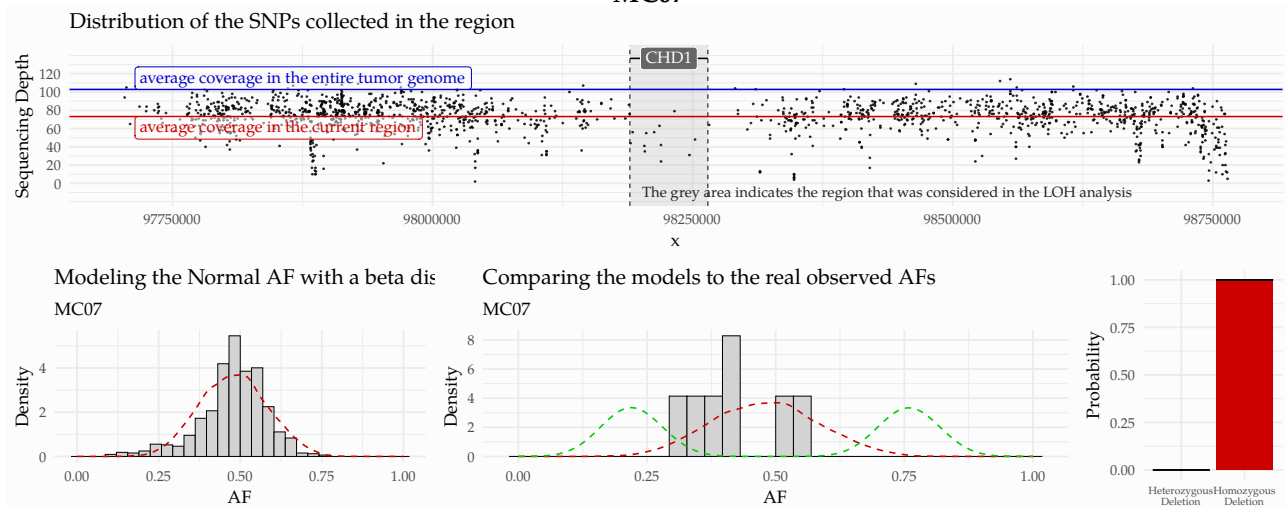

**SRR1534432**

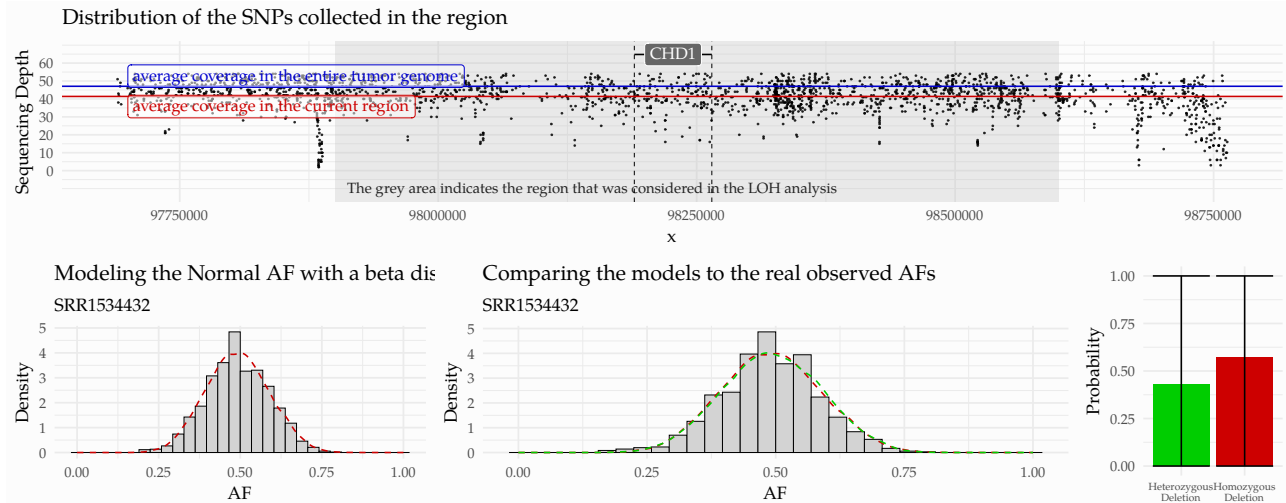

**SRR1536730**

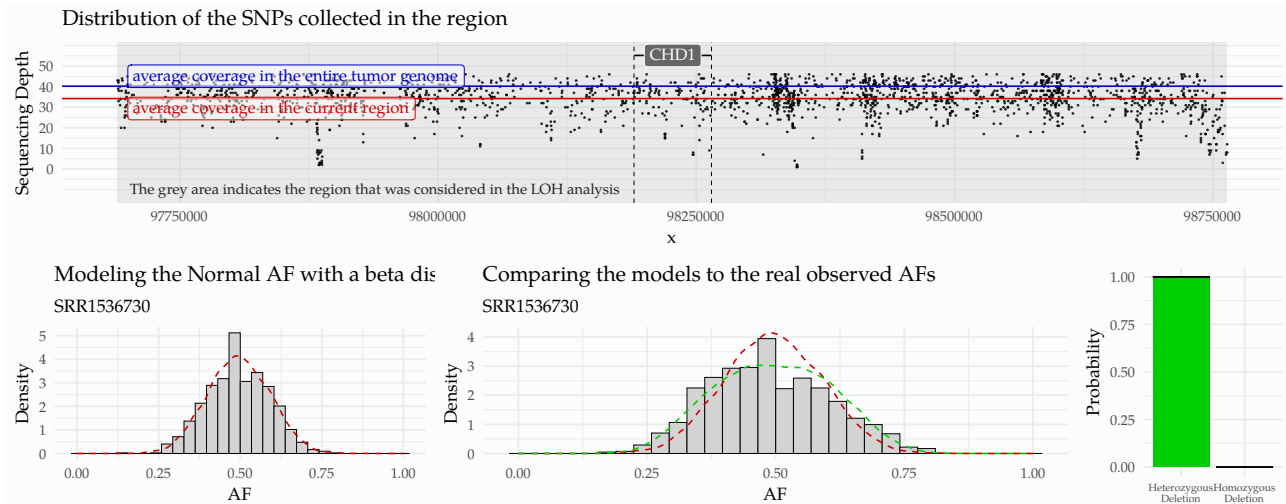

**SRR1536760**

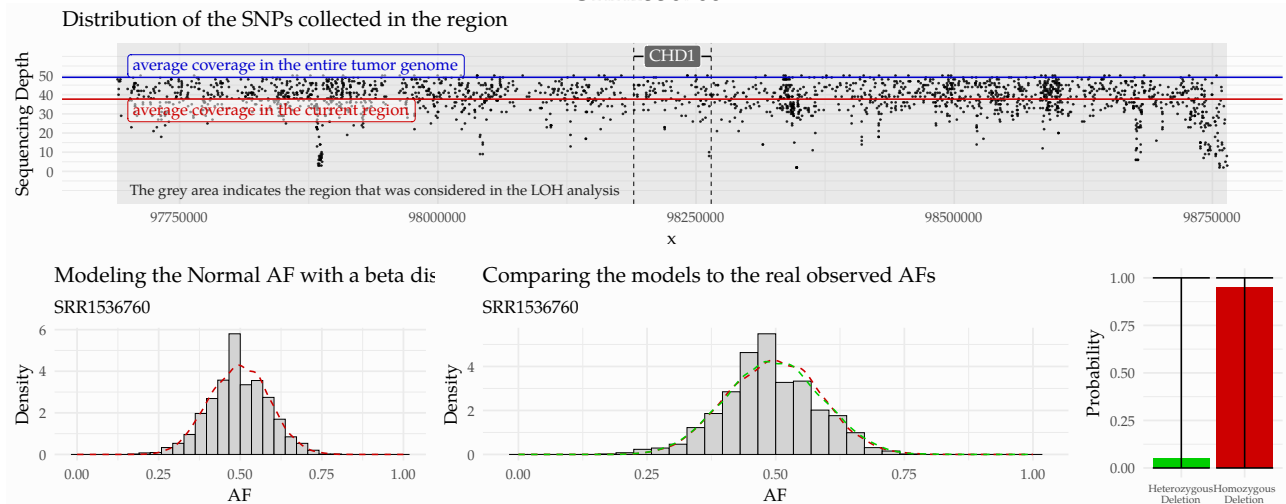

**DO36248**

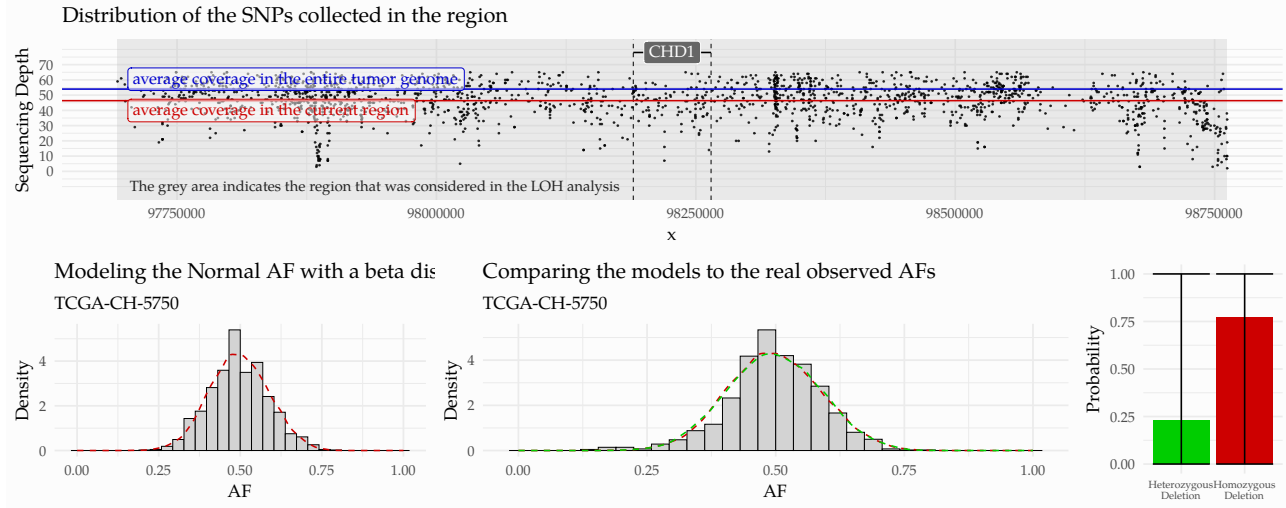

**DO36285**

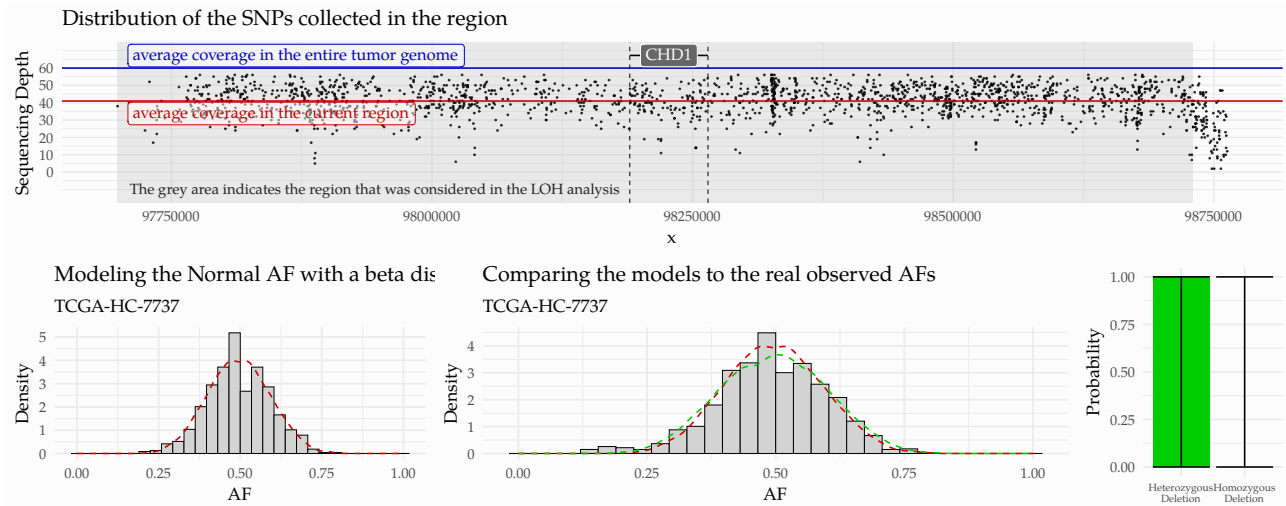

**DO36253**

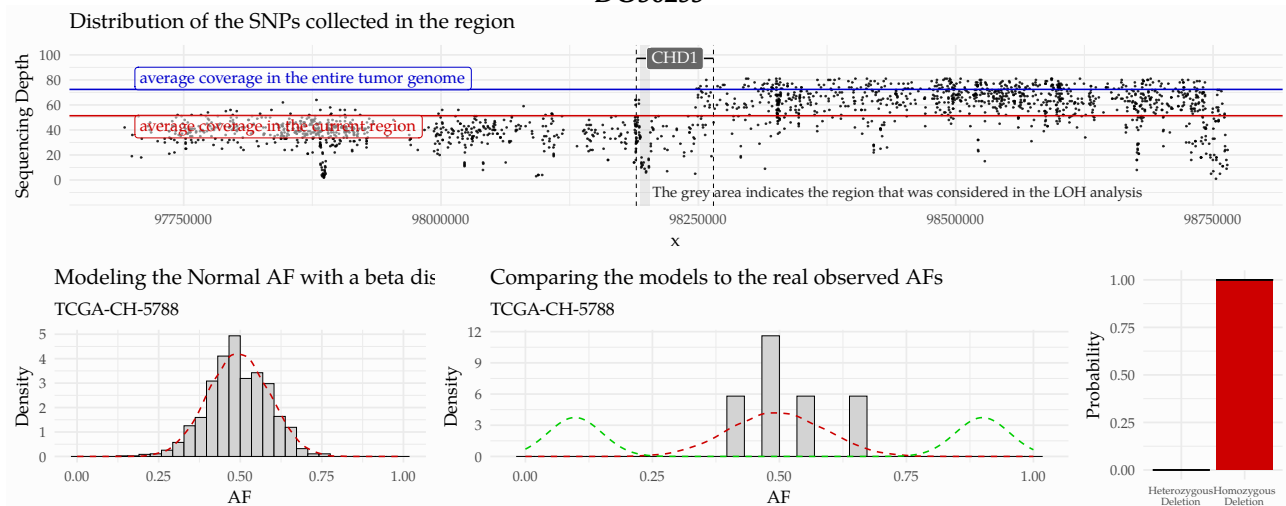

## GENOMIC FEATURES OF THE WHOLE GENOMES

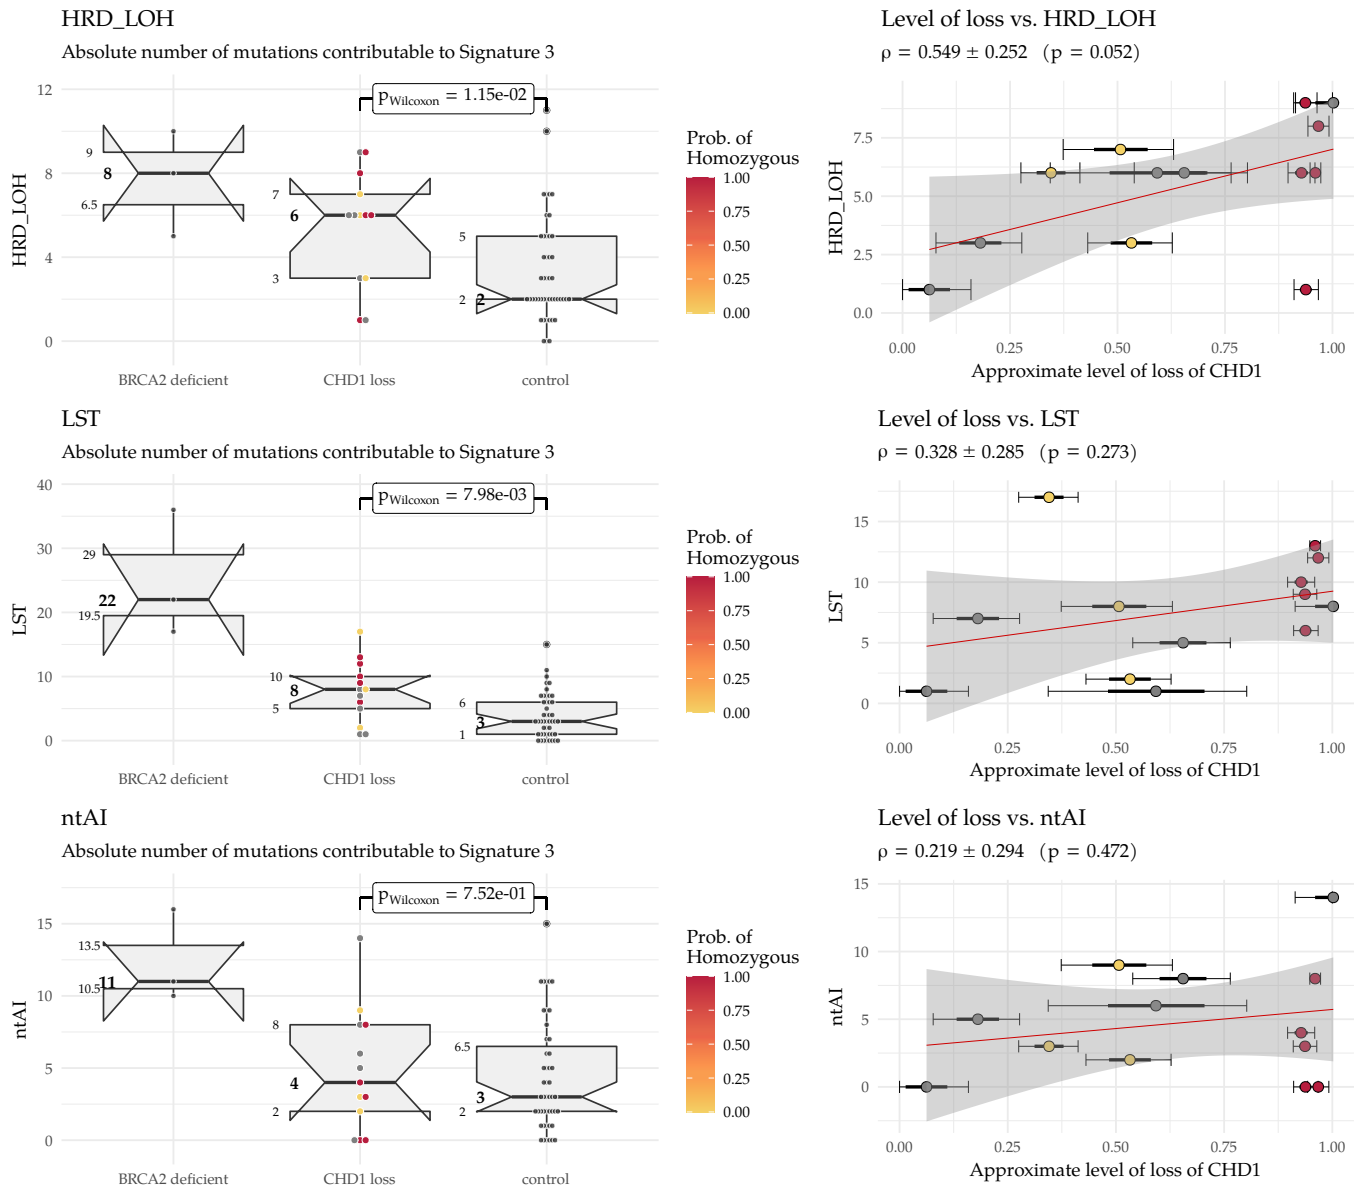

**Supplementary Figure 26:** HRD-related genomic scars in the whole genomes. **HRD\_LOH:** HRD Loss of Heterozygosity, **LST:** Large Scale Transition, **ntAI:** number of telomeric Allelic Imbalance

**Supplementary Figure 27:** Number of variants contributable of the 2nd generation single nucleotide signatures. Signatures 1,2,3,5,6,8 and the total number of SNVs in the sample (numSNV)

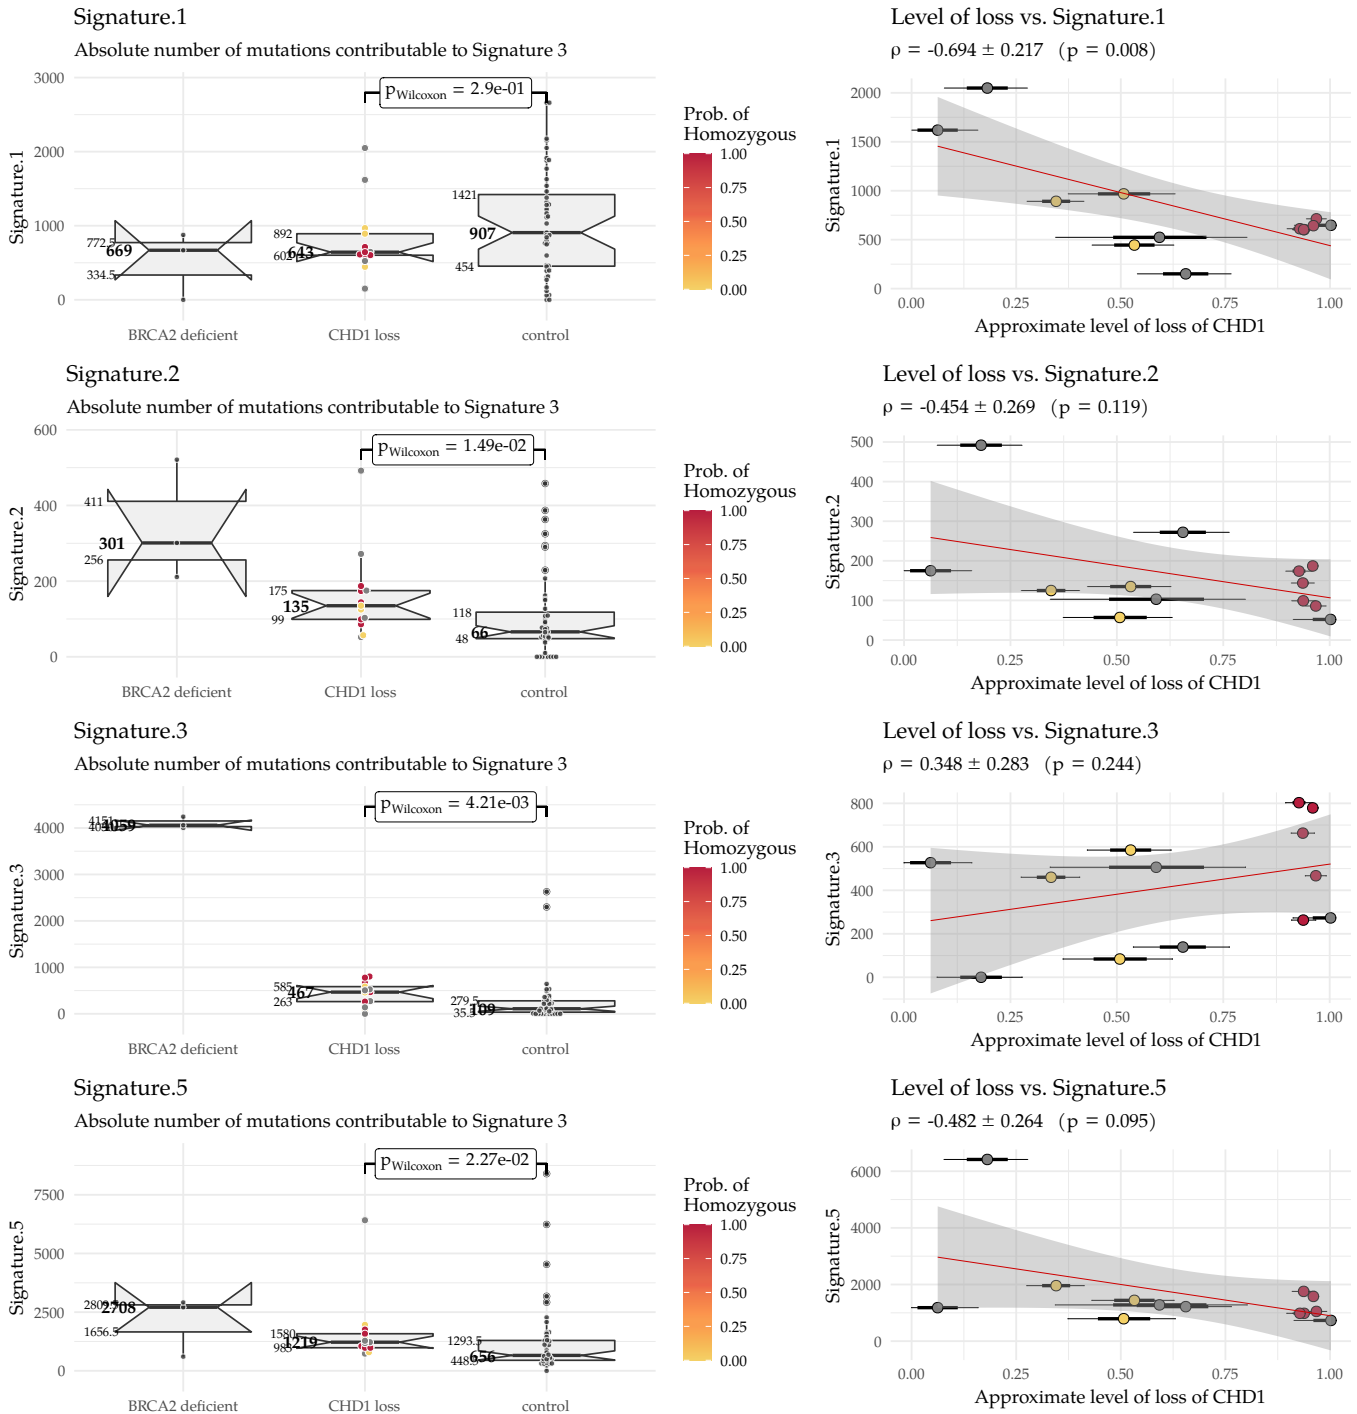



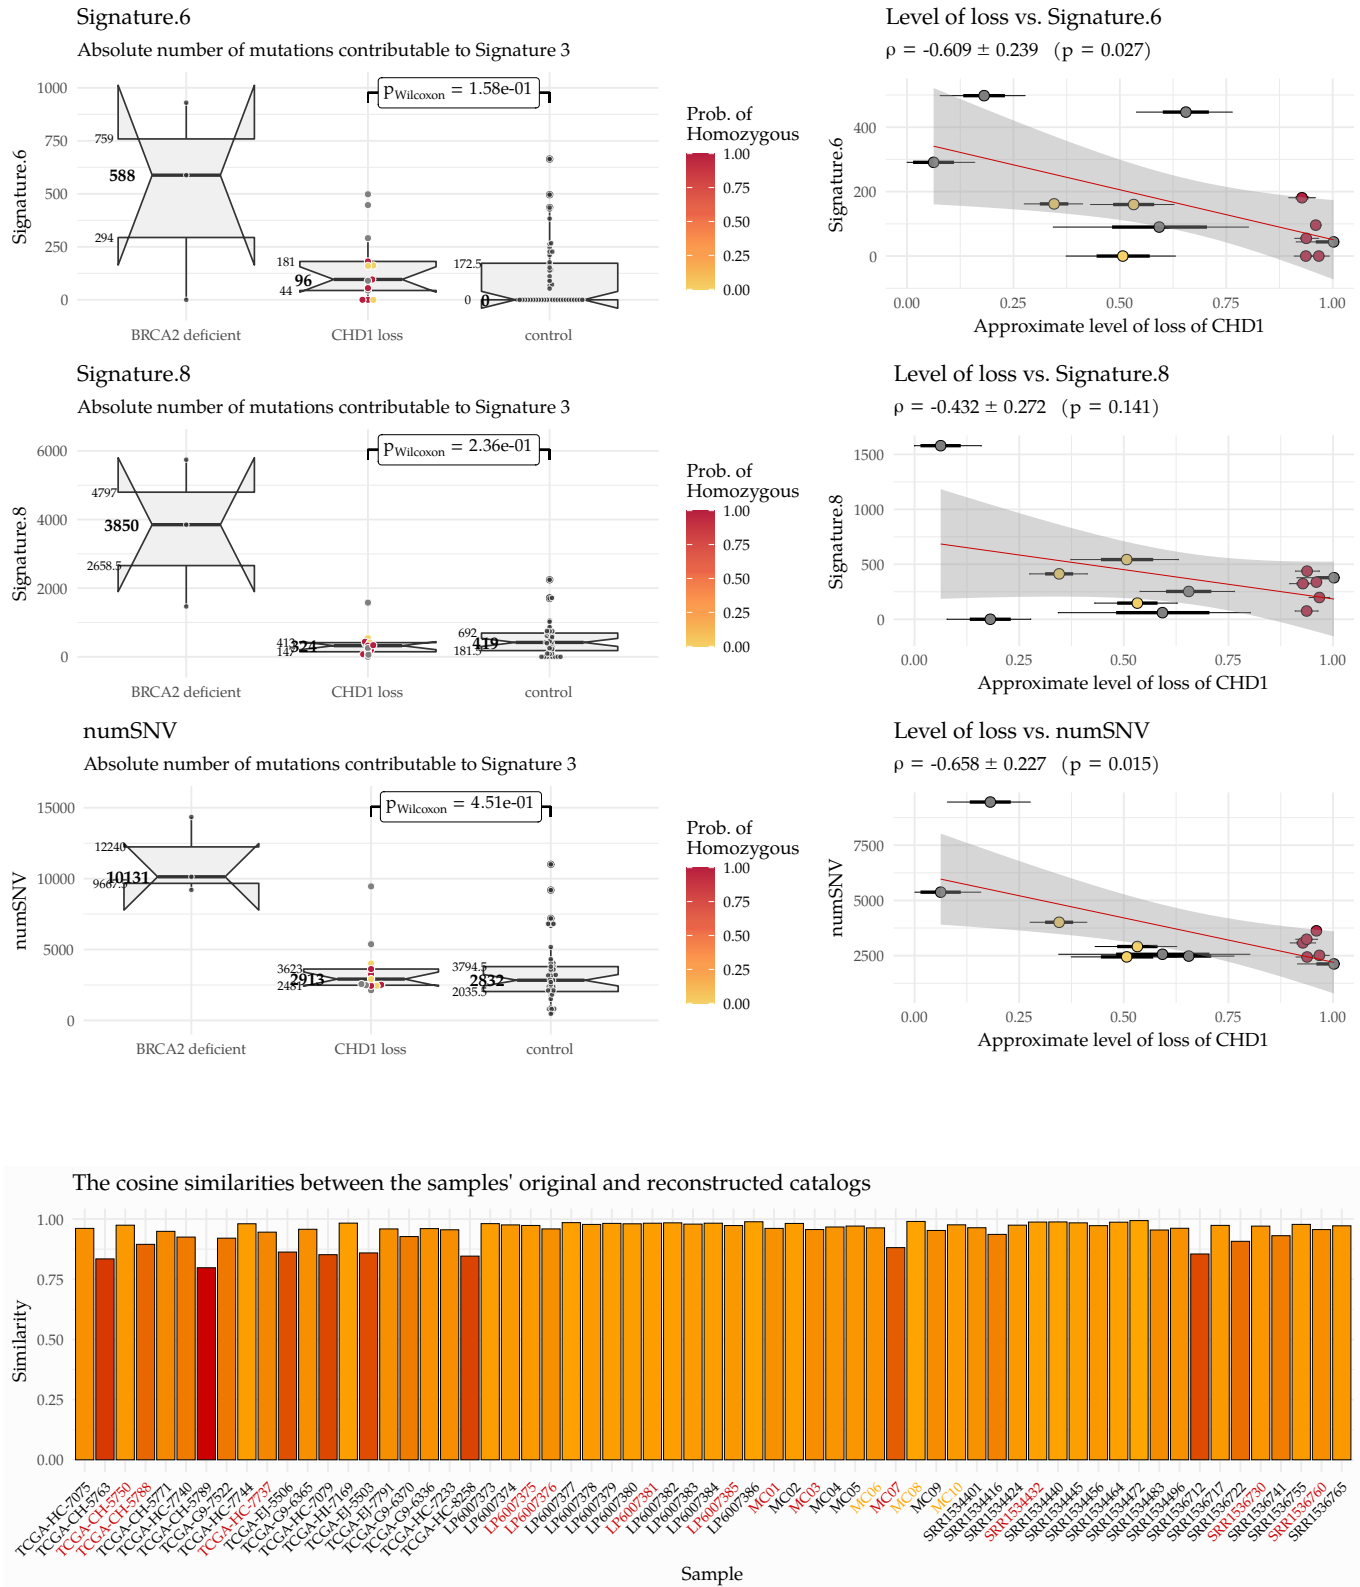

**Supplementary Figure 28:** The cosine similarity between the original and reconstructed mutational SBS spectra in the whole genomes.

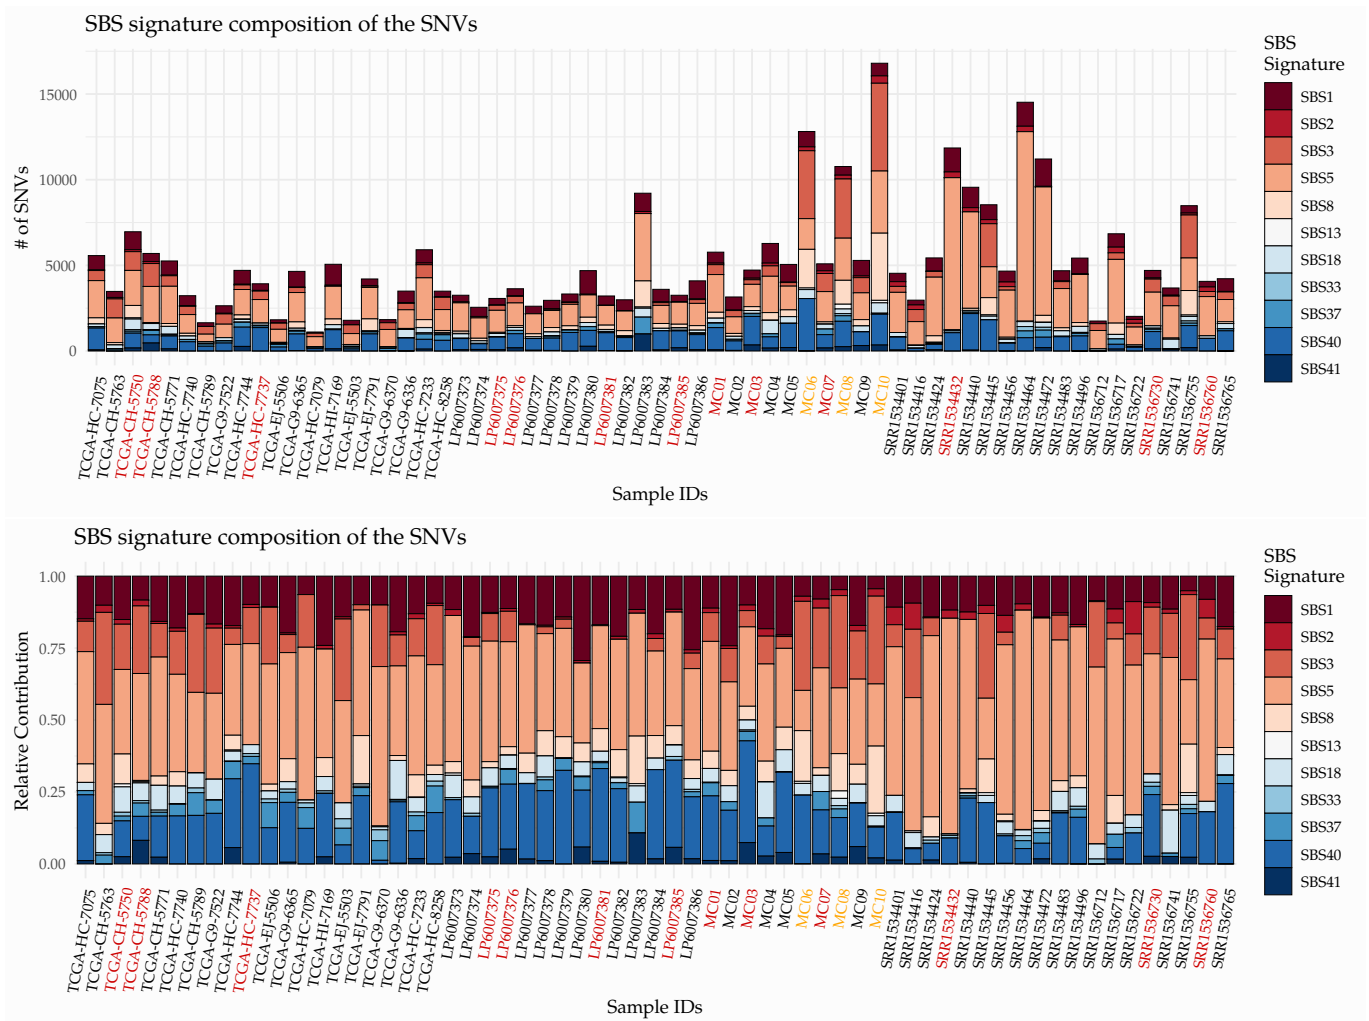

**Supplementary Figure 29:** The SBS signature composition of the whole genomes. Above are the absolute numbers, below the relative ratios.

**Supplementary Figure 30: Third generation single nucleotide (SBS) signatures.**

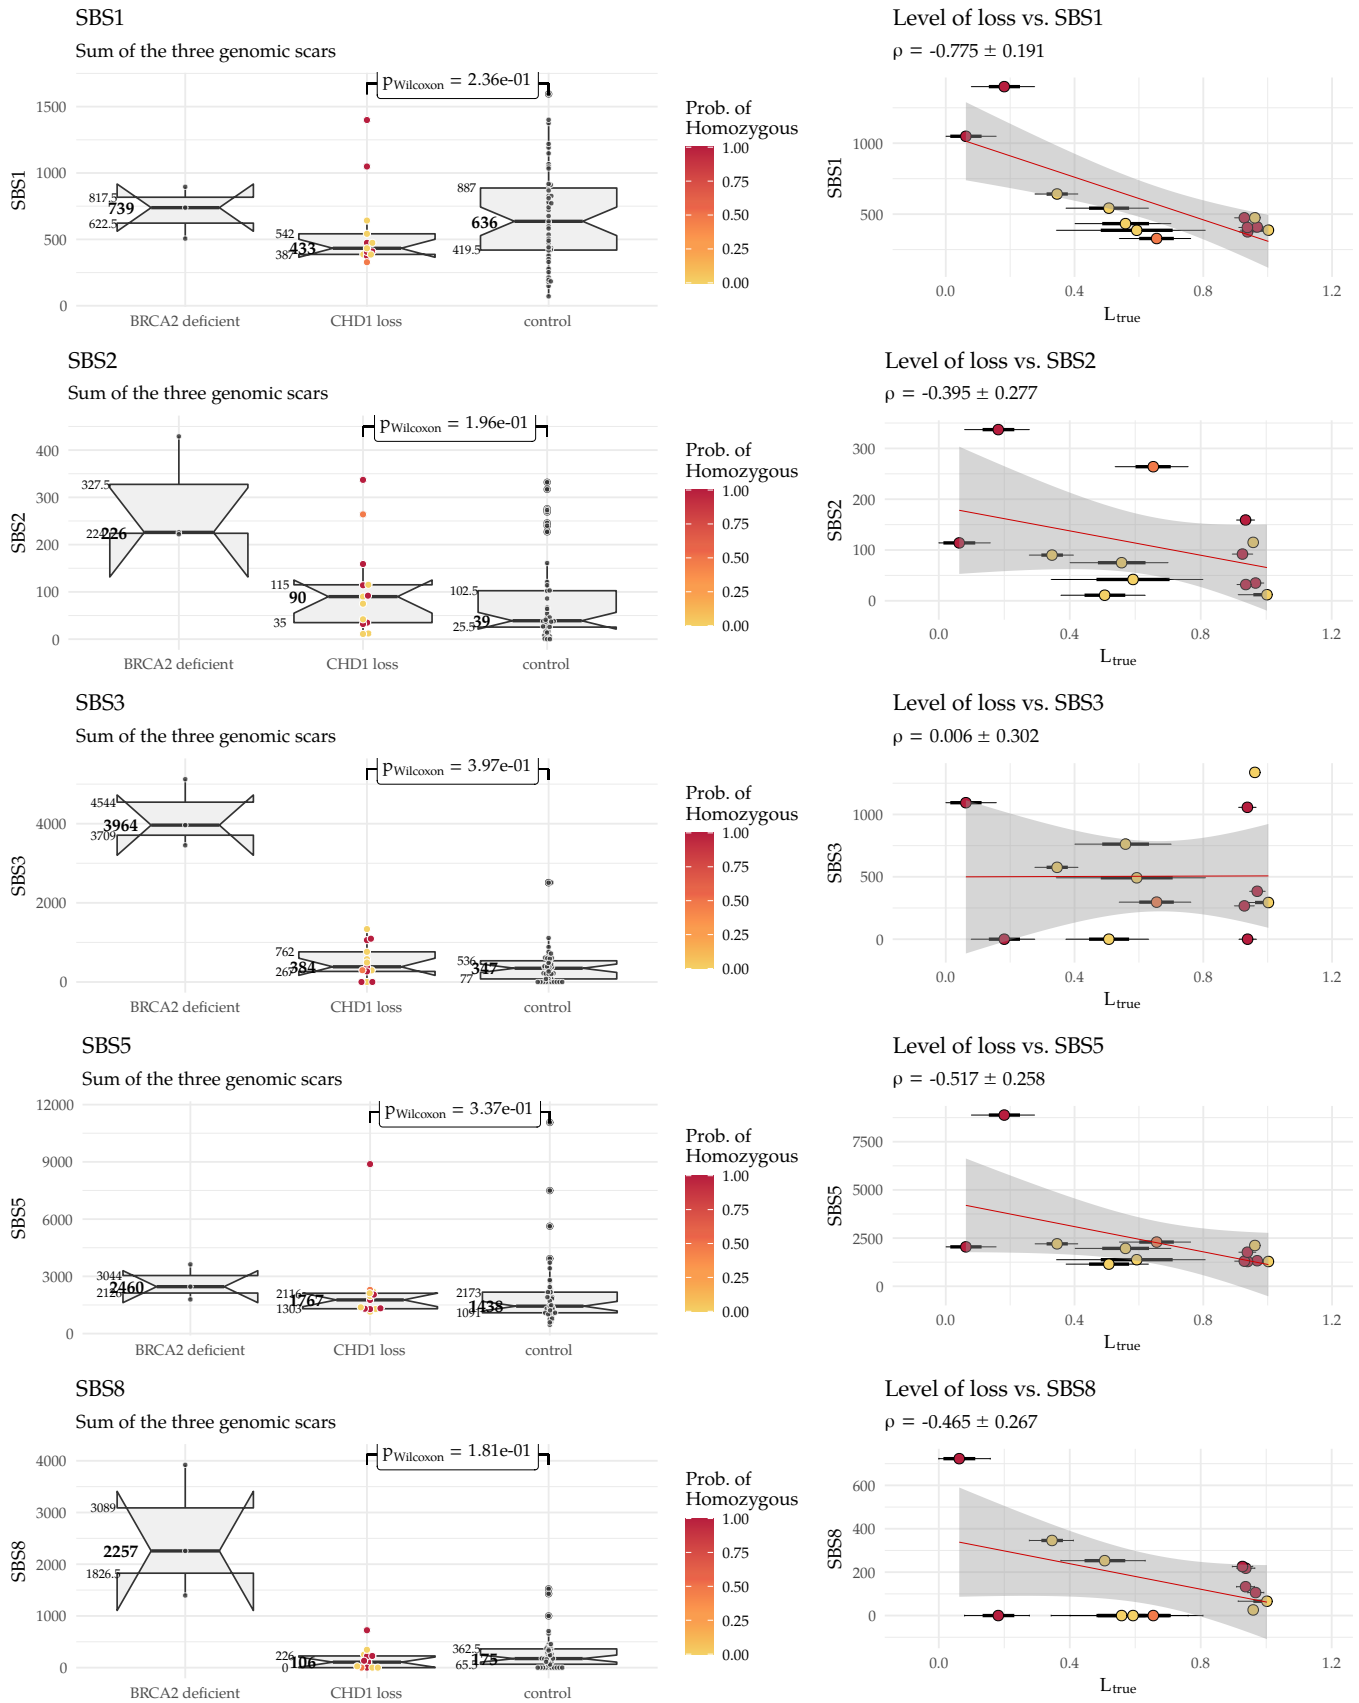

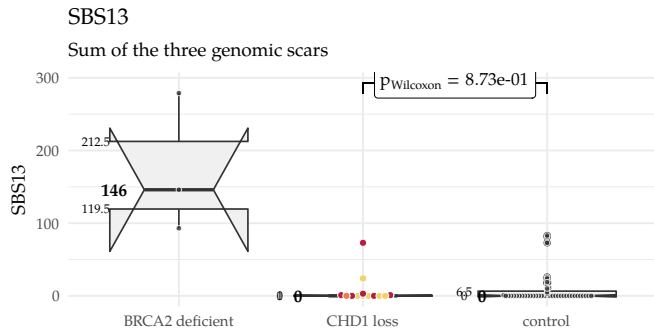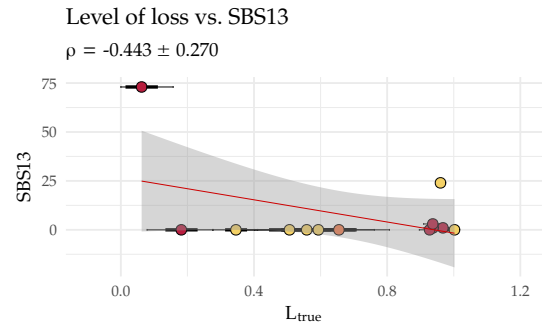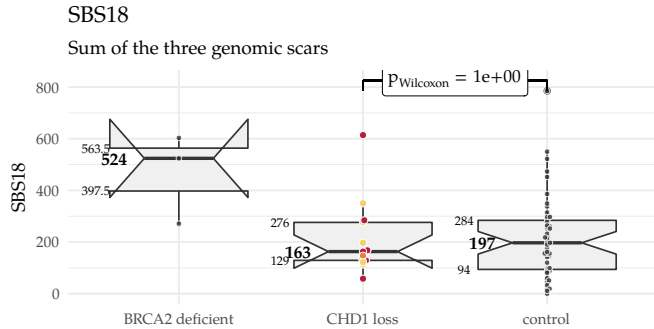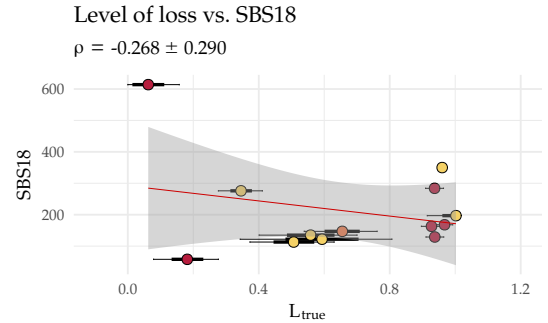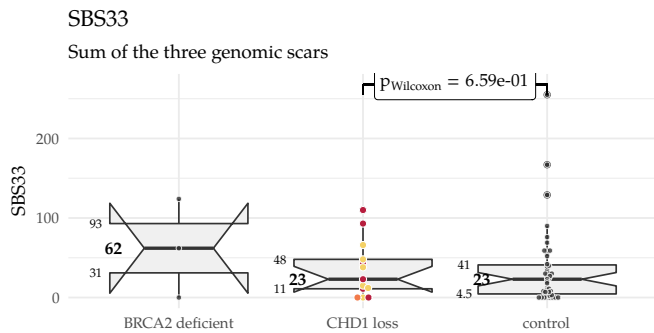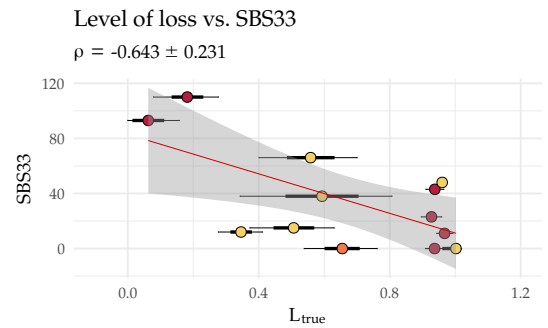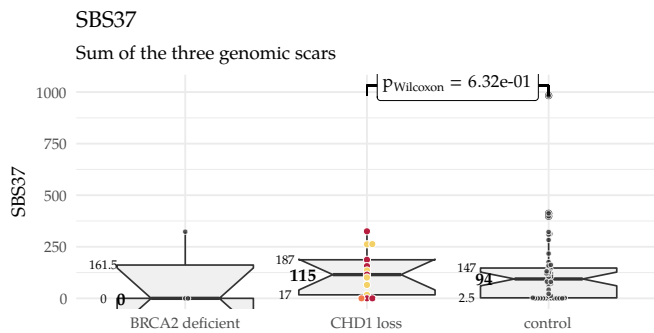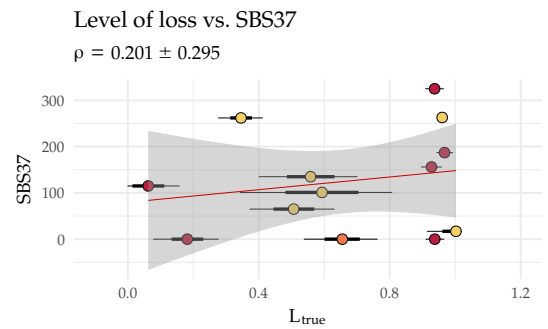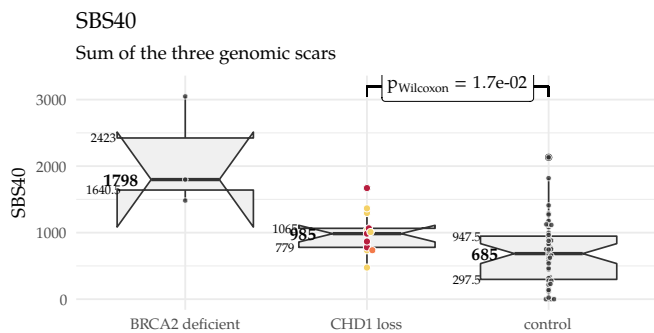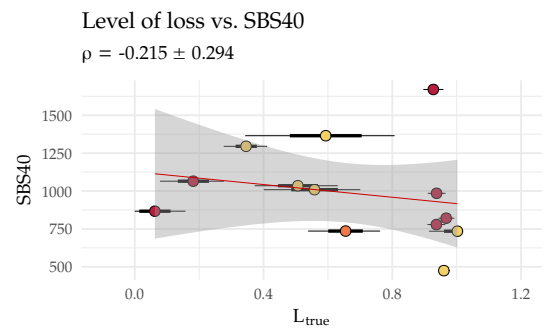

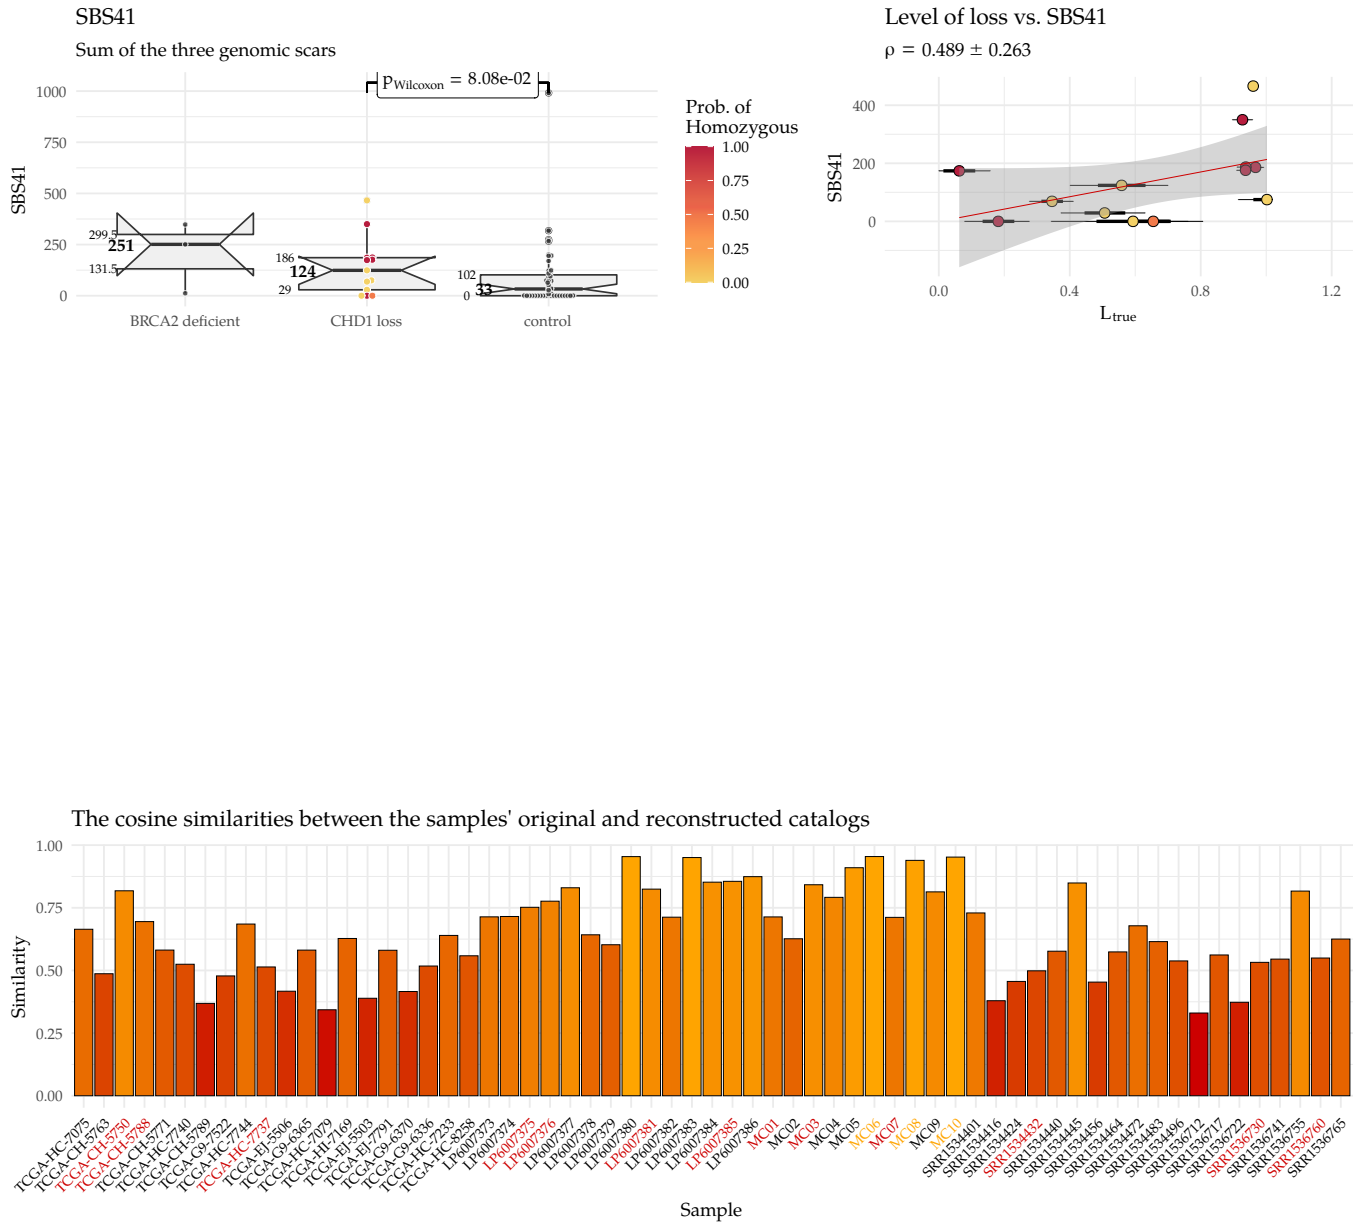

**Supplementary Figure 31:** The cosine similarity between the original and reconstructed mutational ID spectra in the whole genomes.

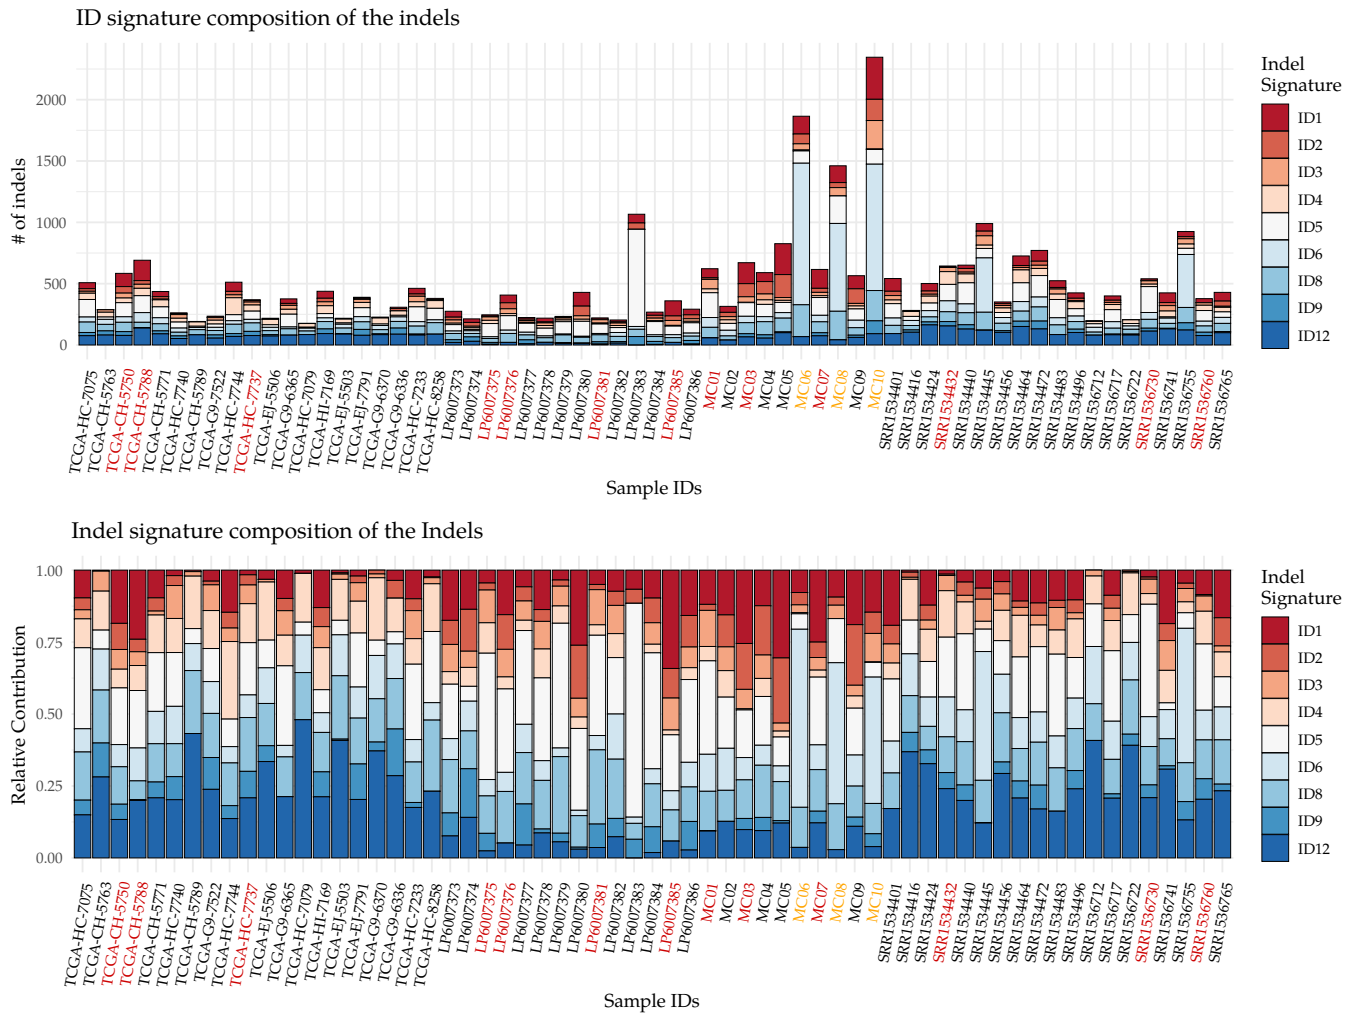

**Supplementary Figure 32:** The ID signature composition of the whole genomes. Above are the absolute numbers, below the relative ratios.

**Supplementary Figure 33:** ↓ Number of variants contributable to the the third generation indel (ID) signatures.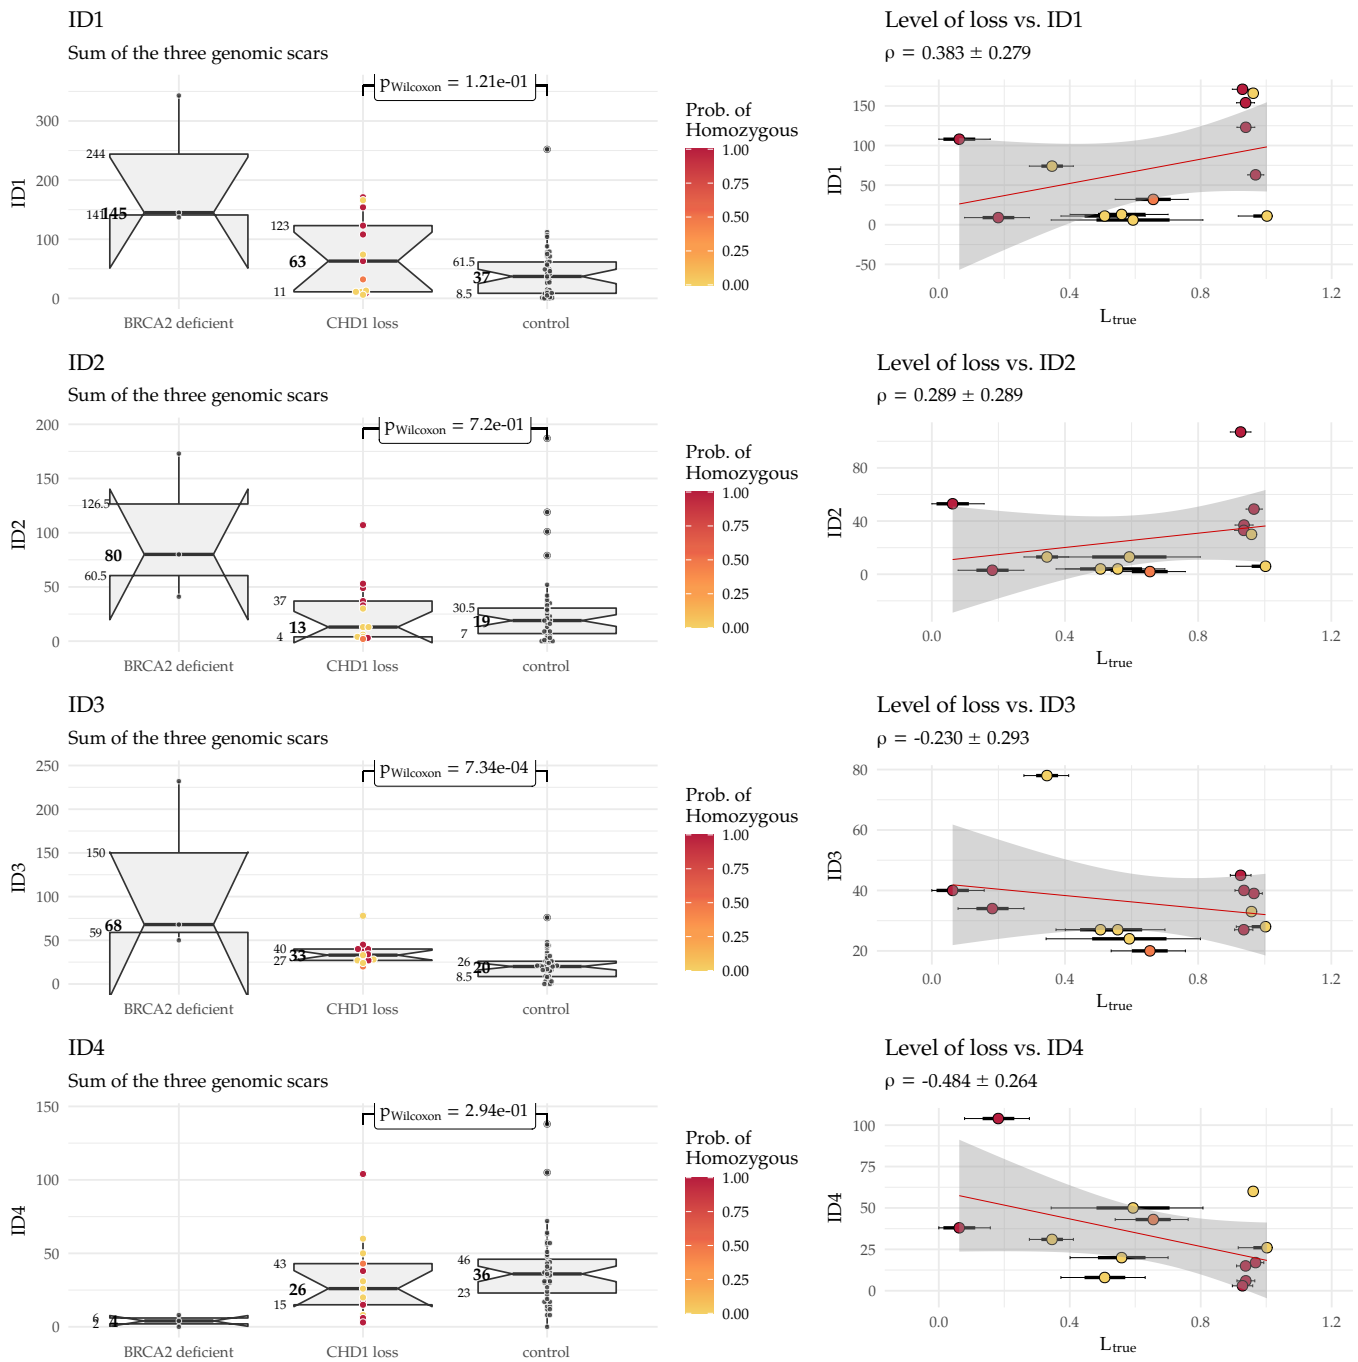

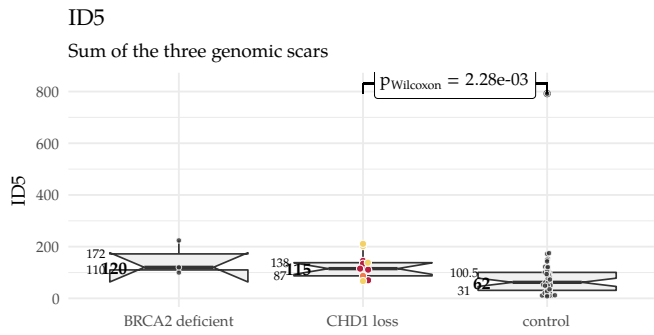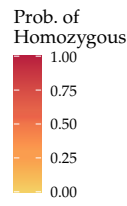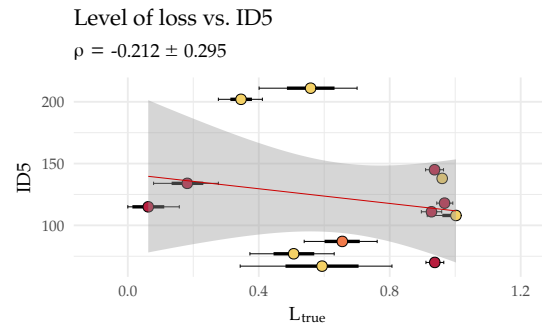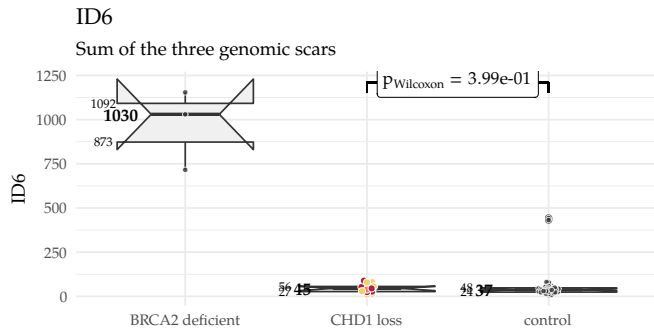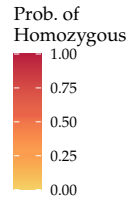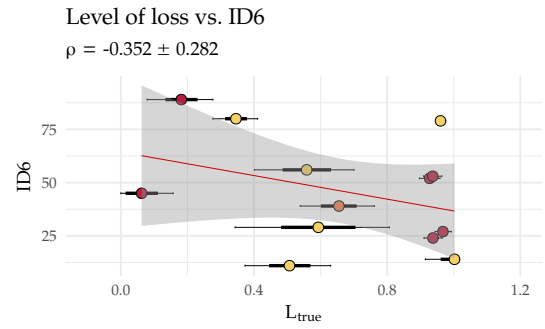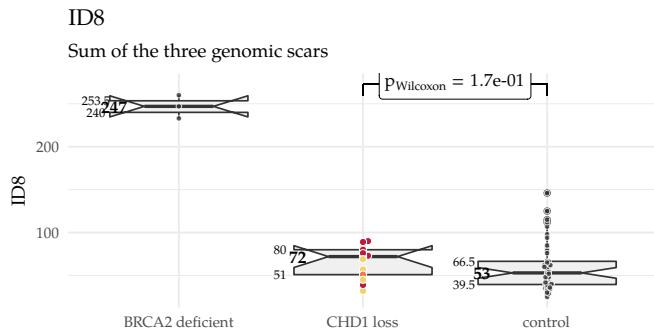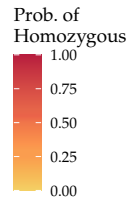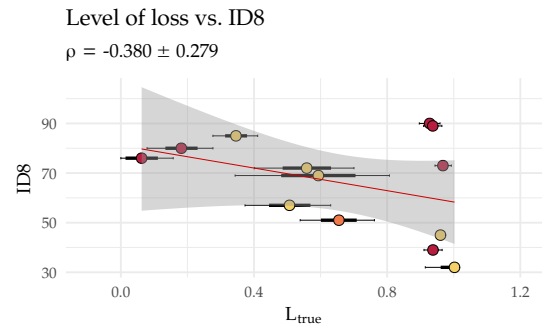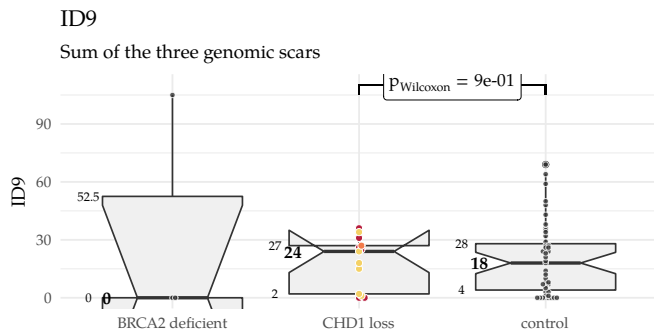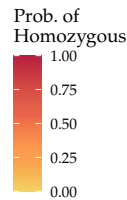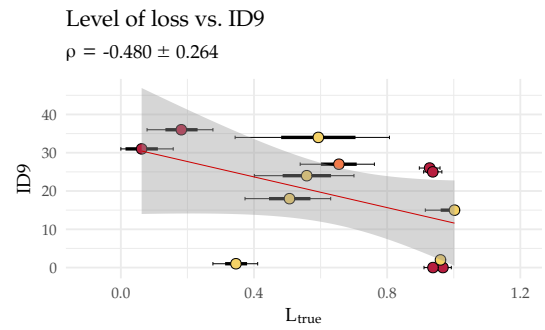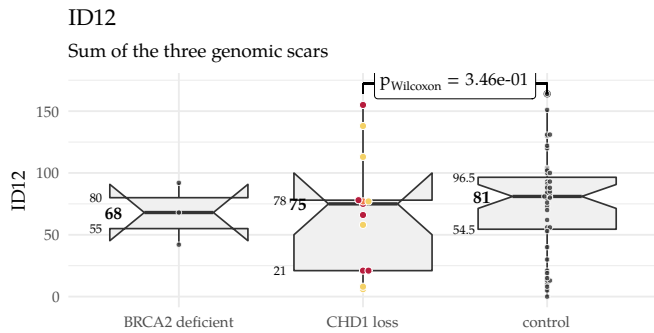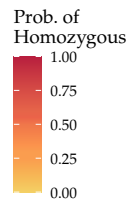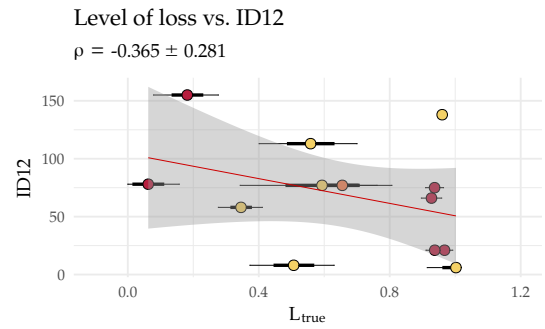



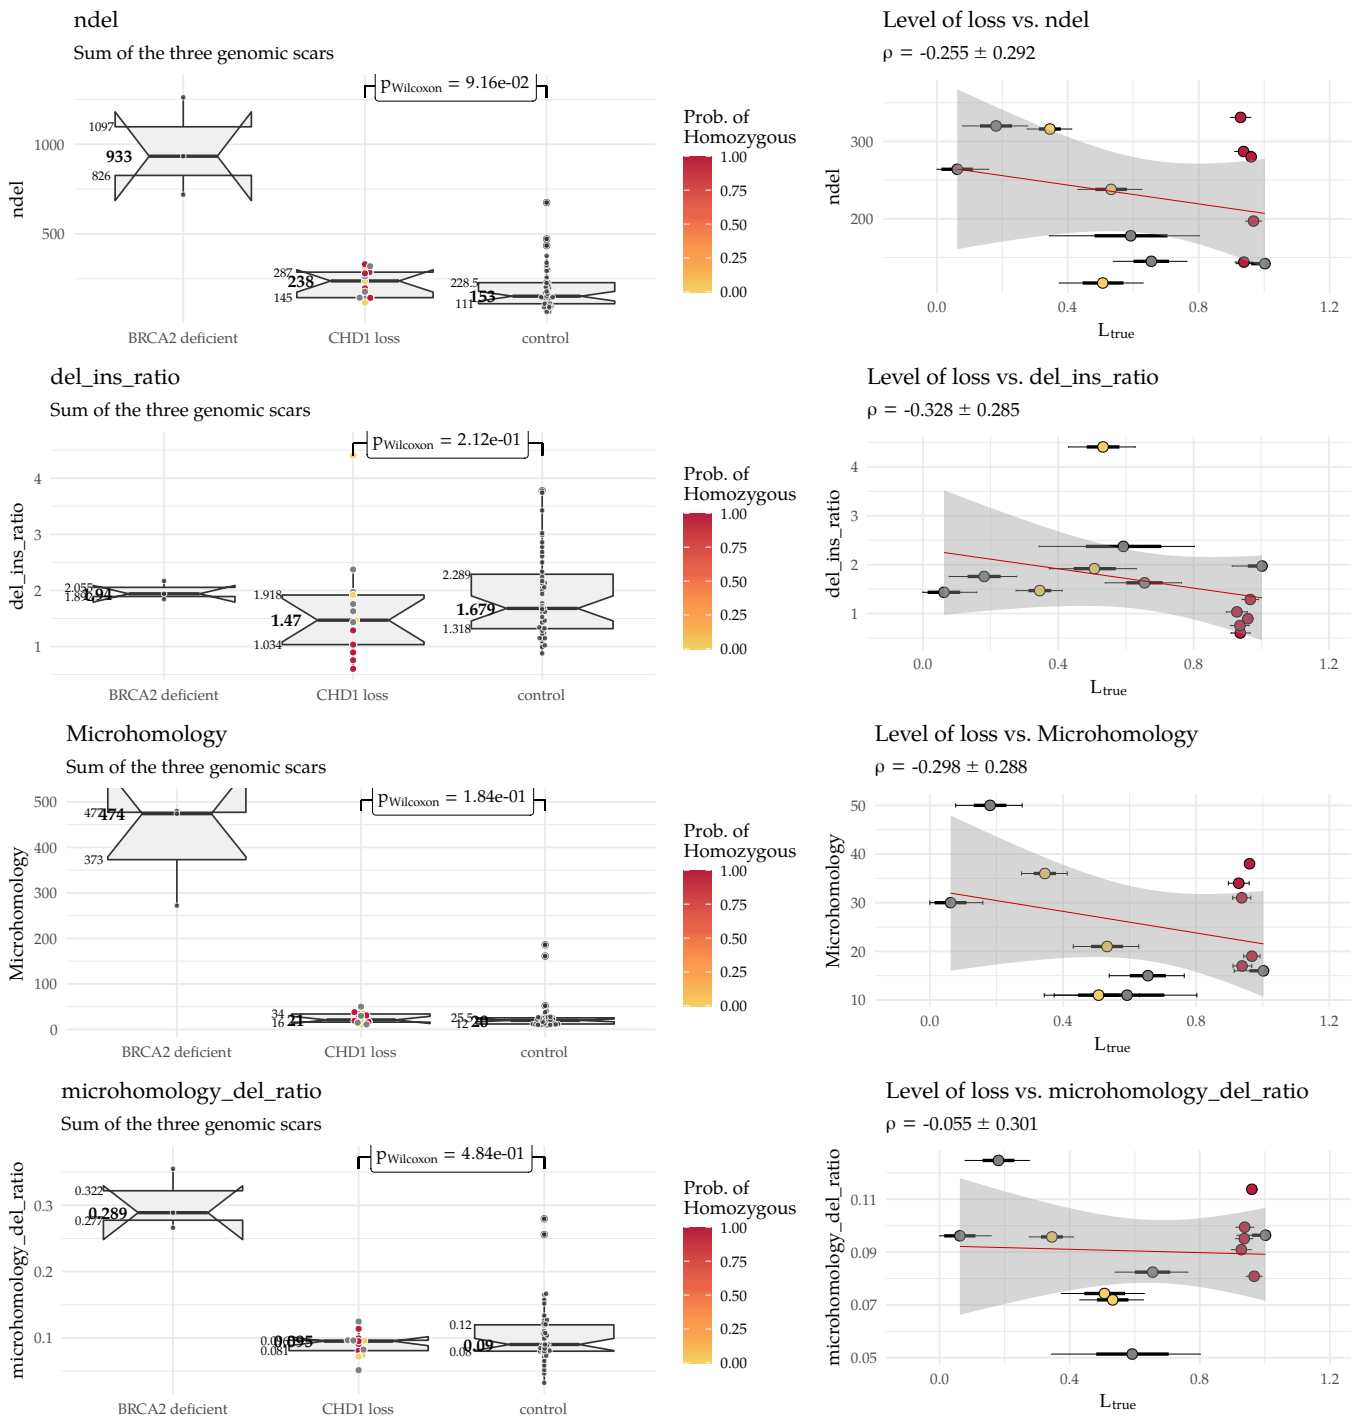

**Supplementary Figure 34:** The "traditional" classification of deletions. ndel: number of deletions, del\_ins\_ratio: deletion insertion ratio, microhomology: number of microhomology mediated deletions, microhomology\_del\_ratio: ratio of microhomology mediated deletions relative to the number of deletions

**Supplementary Figure 35: The six structural-variant-based rearrangement signatures**

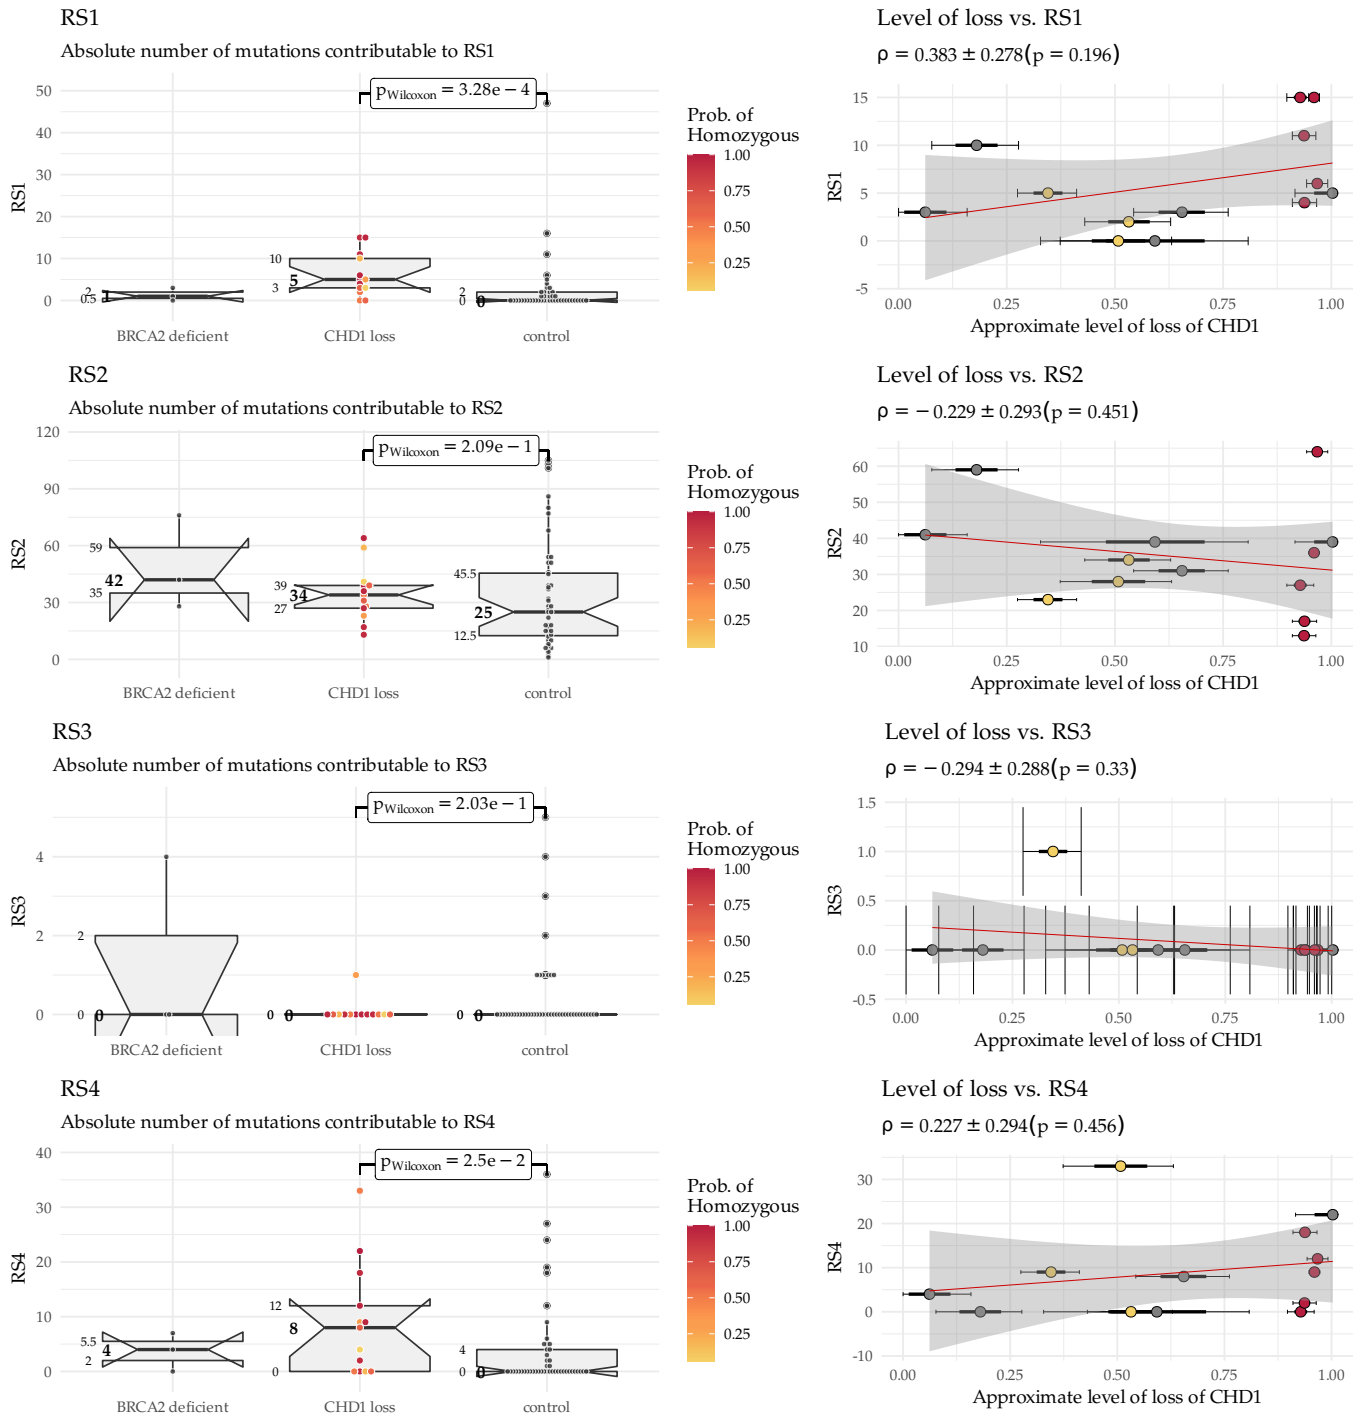

RS5

Absolute number of mutations contributable to RS5

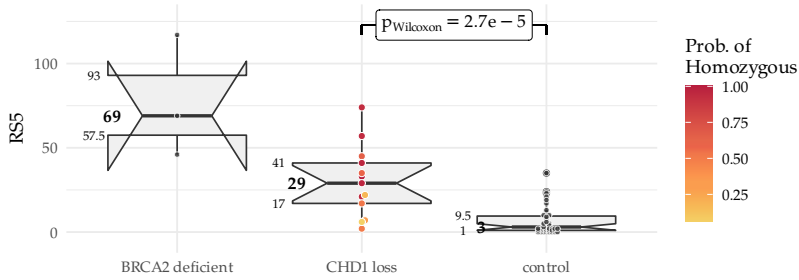

Level of loss vs. RS5

$\rho = 0.637 \pm 0.233 (p = 0.019)$

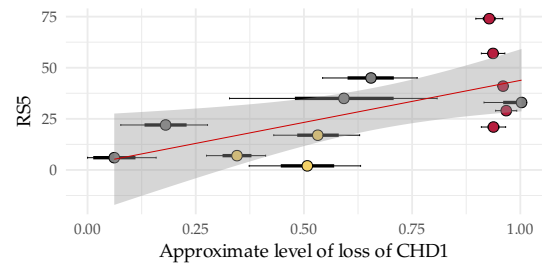

RS6

Absolute number of mutations contributable to RS6

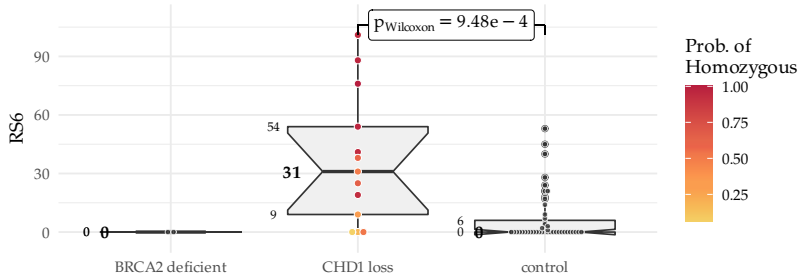

Level of loss vs. RS6

$\rho = 0.773 \pm 0.191 (p = 0.002)$

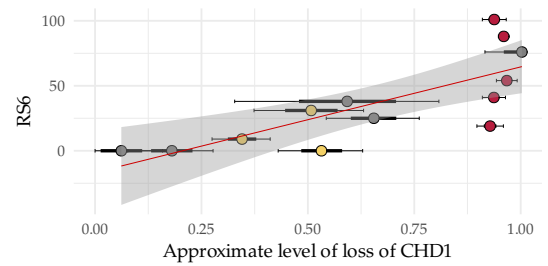

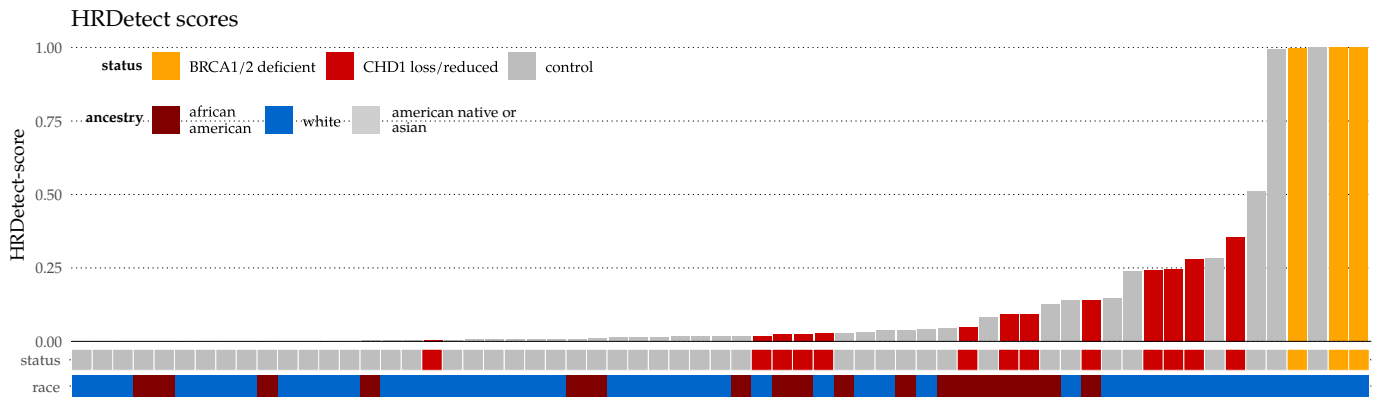

**Supplementary Figure 36:** HRDetect score summary - WGS. The weights of the model from the original HRDetect publication from Davies et. al, in ascending order: intercept = -3.3642, Signature.8 = 0.09062, HRD-LOH = 0.6666, RS5 = 0.8467, RS3 = 1.1532, Signature.3 = 1.6114, mhm.del.ratio = 2.3977

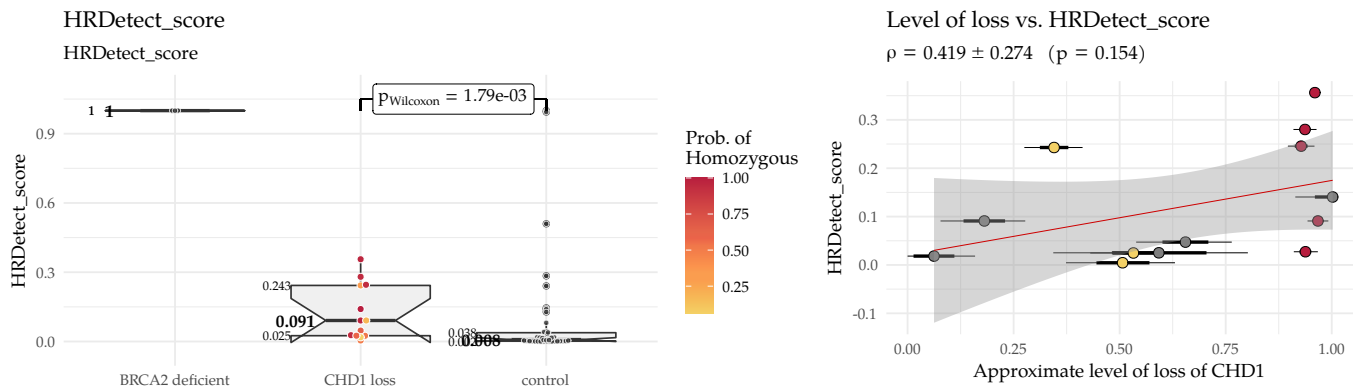

**Supplementary Figure 37:** HRDetect scores in samples with CHD1 loss vs. CHD1 intact samples

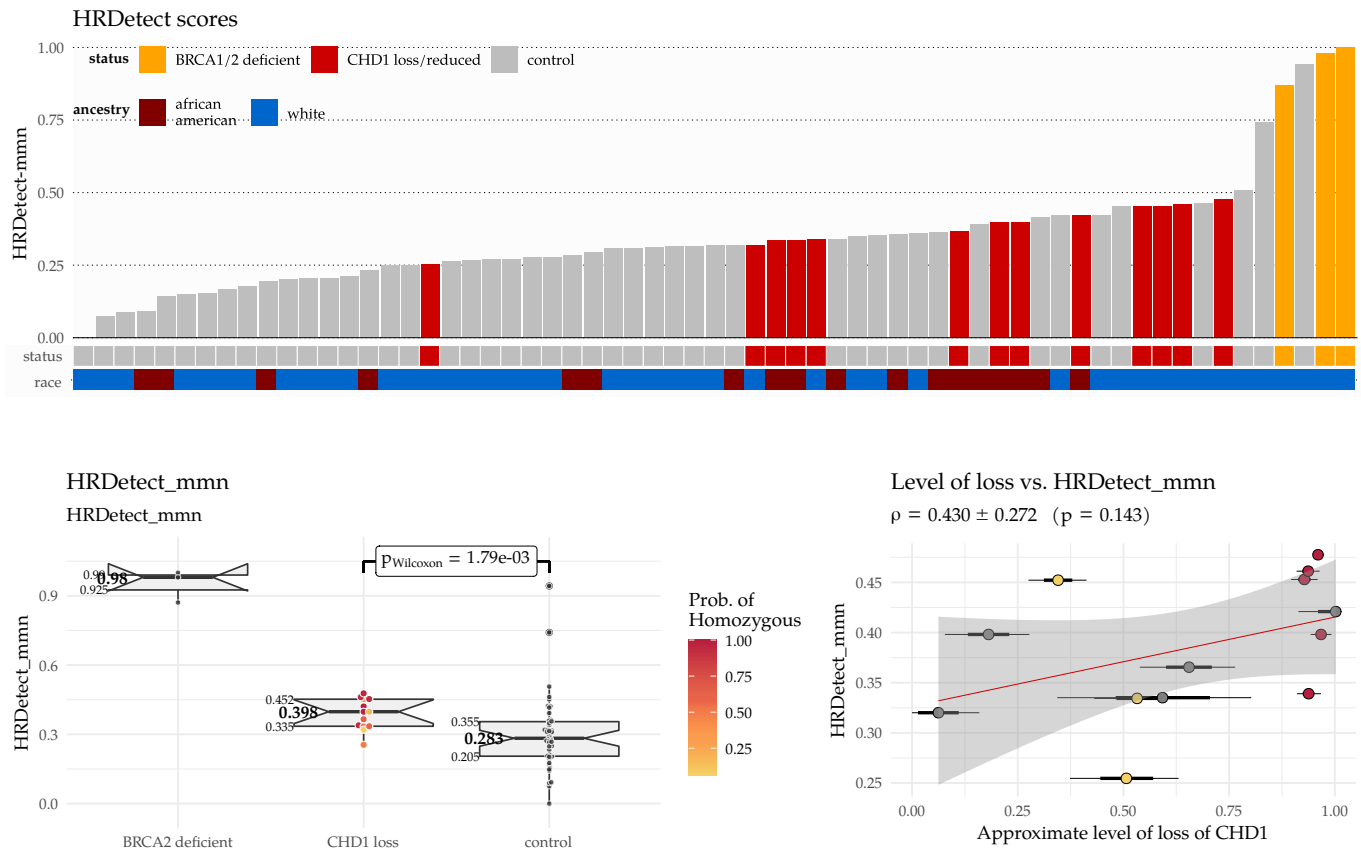

**Supplementary Figure 38:** The HRDetect model is a logistic regression model, in which the ordinary linear regression scores ( $x$ ) are transformed into the range of  $[0,1]$  by putting them through a nonlinear logistic function:  $\text{HRDetect}_{\text{probability}} = s = \frac{1}{1+e^{-x}}$ . The linearized, non-probabilistic "raw" scores are extracted from this formula:  $x = \ln\left(\frac{s}{1-s}\right)$ . The scores were min-max normalized (mmn) for visualization purposes.

## GENOMIC FEATURES OF THE WHOLE EXOMES

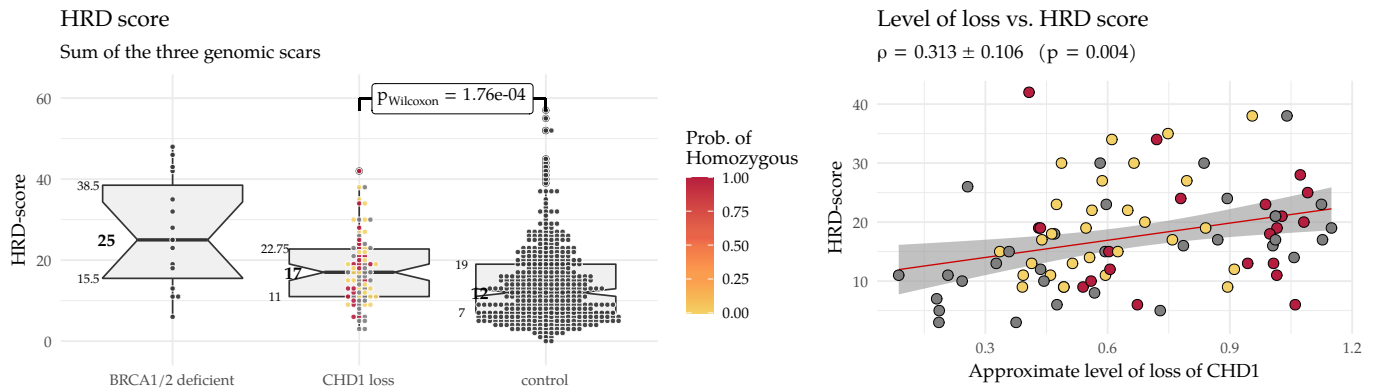

**Supplementary Figure 39:** HRD-scores (sum of the three genomic scars) of the whole exomes

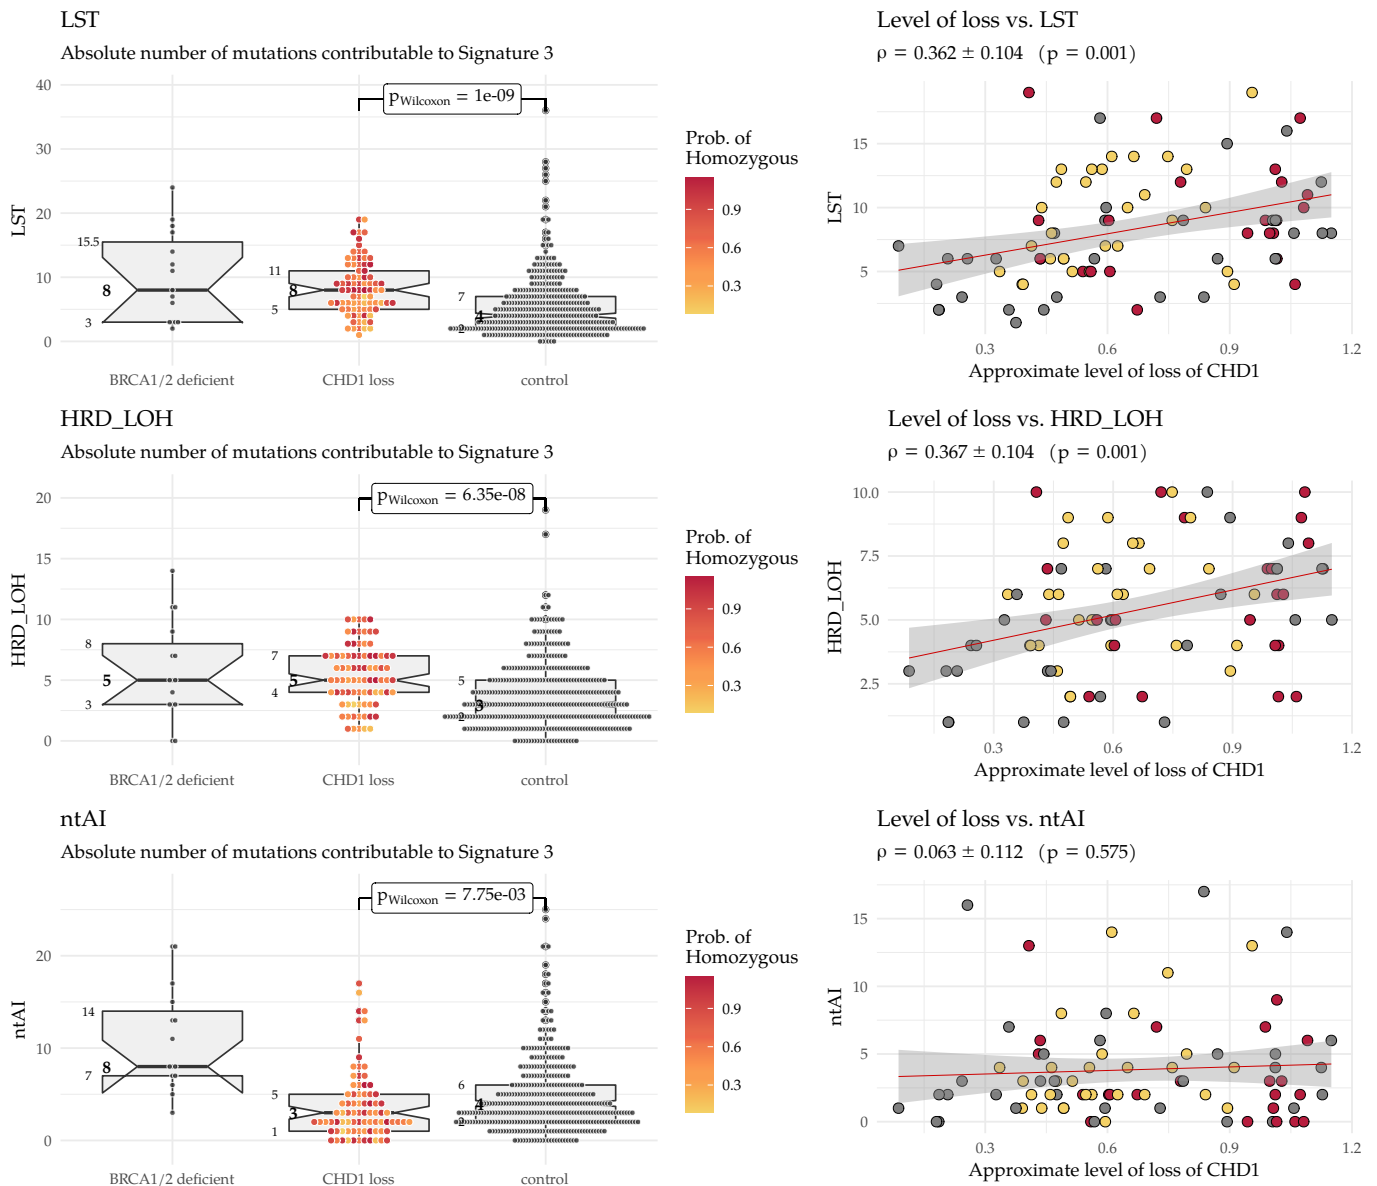

**Supplementary Figure 40:** HRD-related genomic scars in the whole exomes. **HRD\_LOH:** HRD Loss of Heterozygosity, **LST:** Large Scale Transition, **ntAI:** number of telomeric Allelic Imbalance

**Supplementary Figure 41:** Number of variants contributable to the 2nd generation single nucleotide signatures – WES. Signatures 1,2,3,5,6,8 and the total number of SNVs in the sample (numSNV)

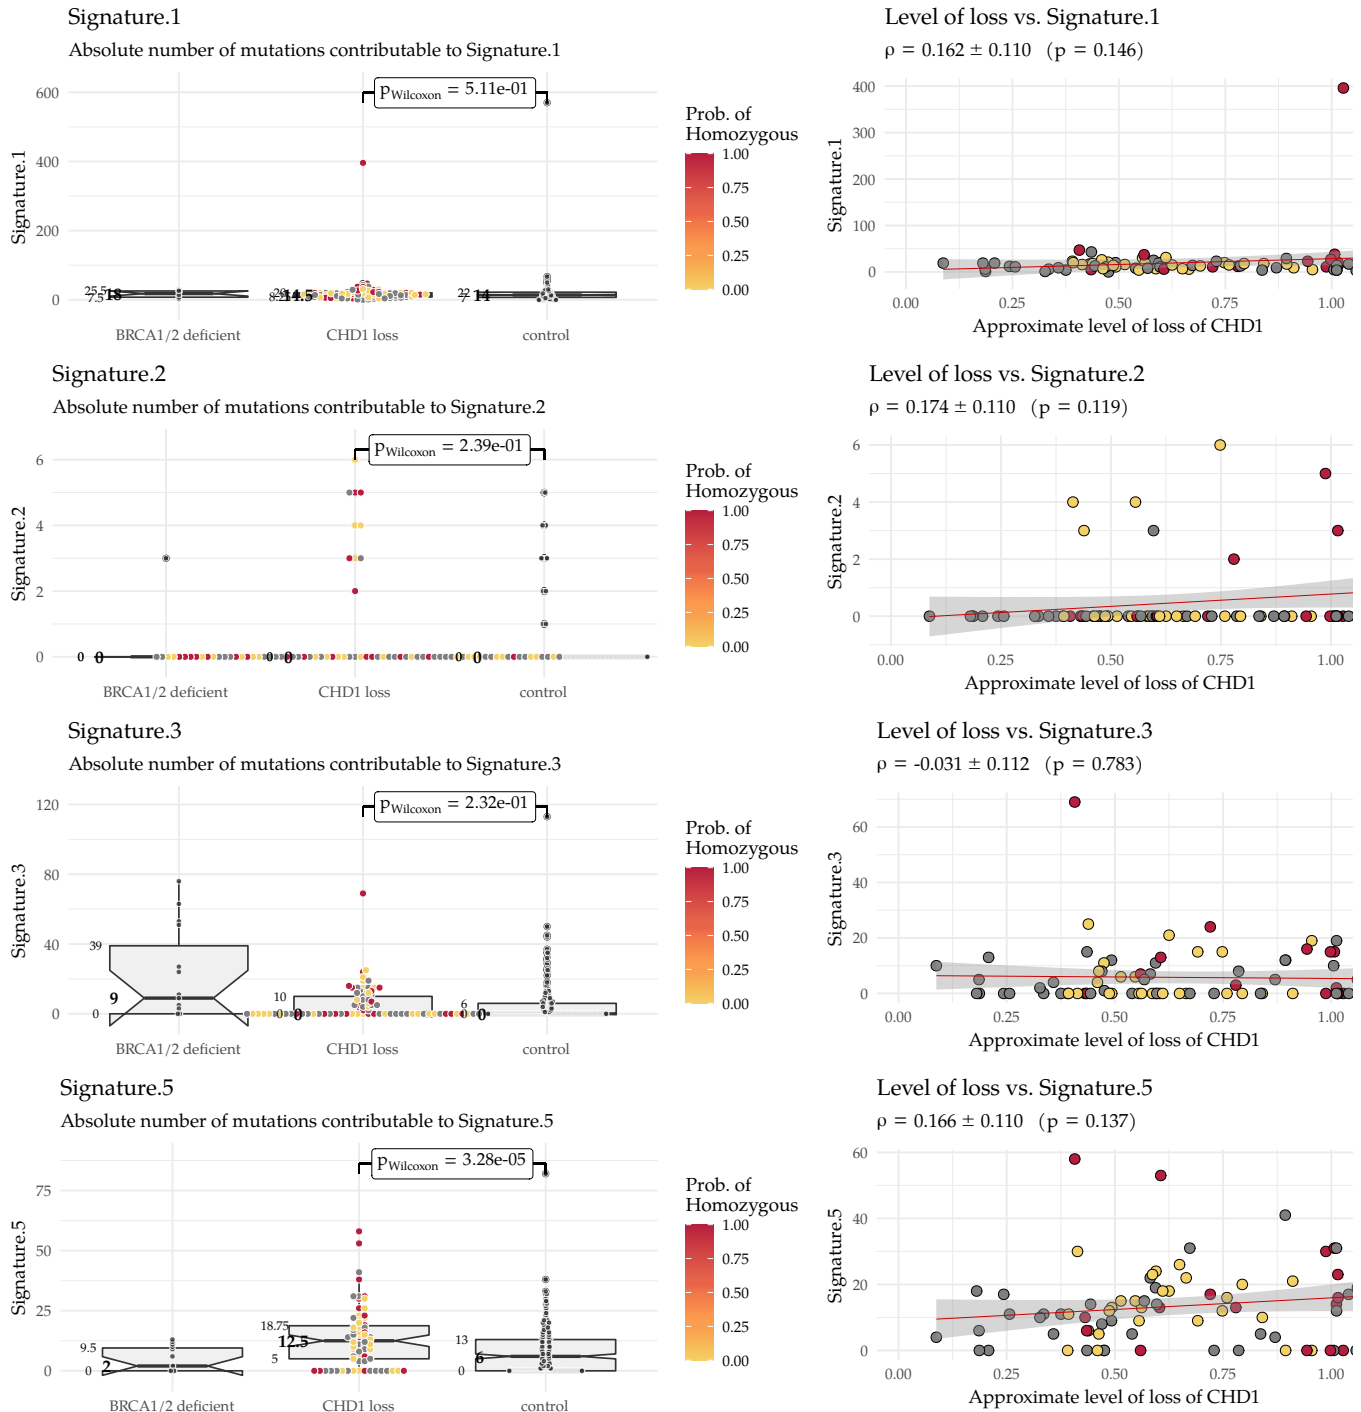



Signature.8

Absolute number of mutations contributable to Signature.8

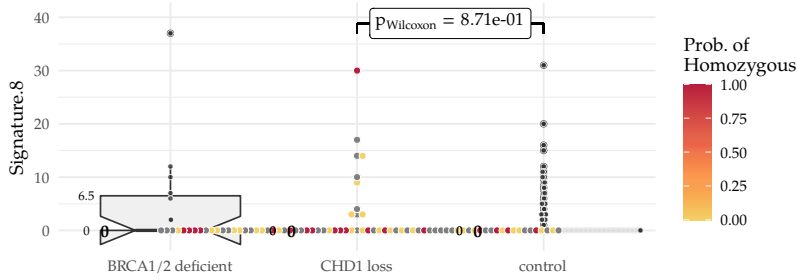

Level of loss vs. Signature.8

$\rho = 0.017 \pm 0.112$  ( $p = 0.881$ )

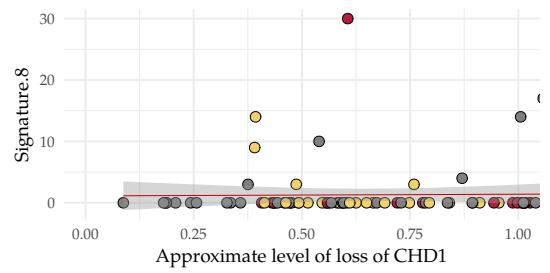

Signature.10

Absolute number of mutations contributable to Signature.10

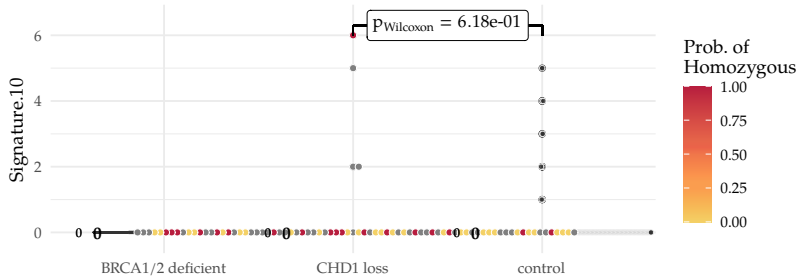

Level of loss vs. Signature.10

$\rho = 0.158 \pm 0.110$  ( $p = 0.156$ )

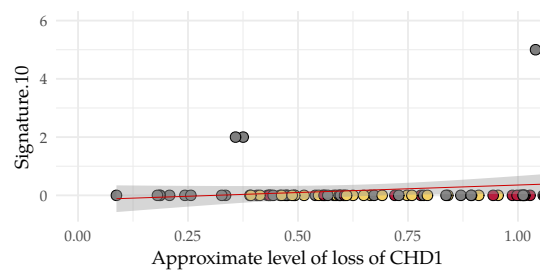

Signature.13

Absolute number of mutations contributable to Signature.13

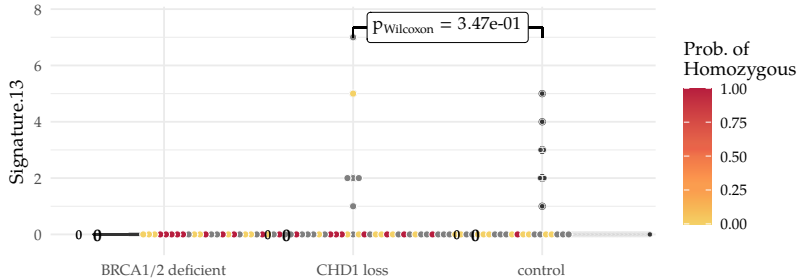

Level of loss vs. Signature.13

$\rho = 0.110 \pm 0.111$  ( $p = 0.326$ )

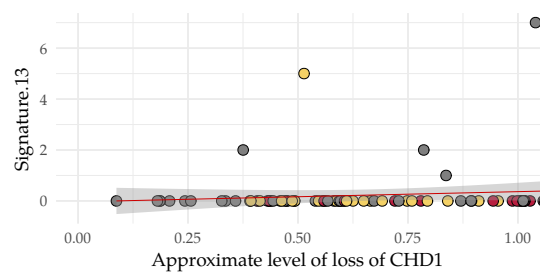

Signature.18

Absolute number of mutations contributable to Signature.18

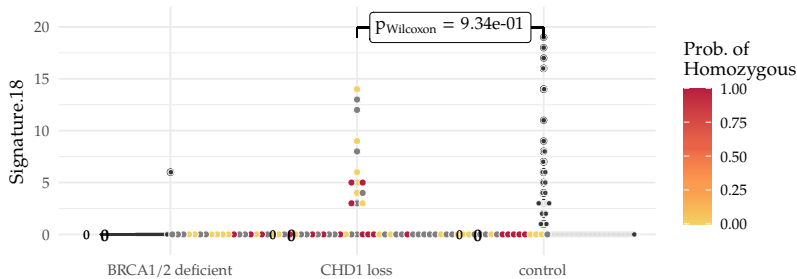

Level of loss vs. Signature.18

$\rho = 0.219 \pm 0.109$  ( $p = 0.048$ )

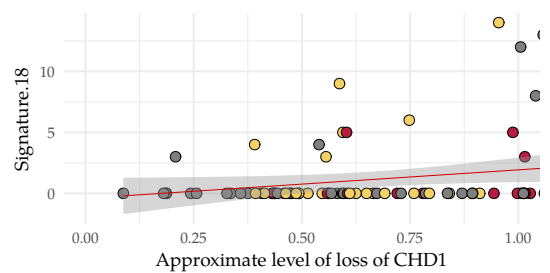

numSNV

Absolute number of mutations contributable to numSNV

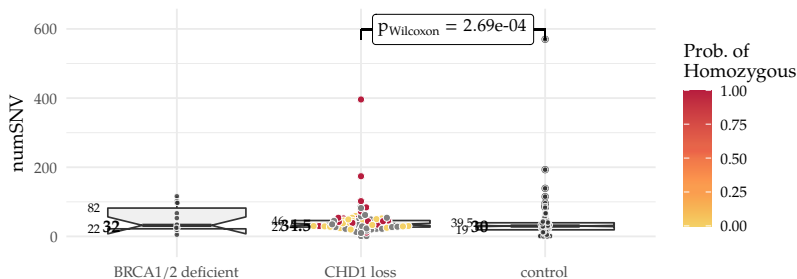

Level of loss vs. numSNV

$\rho = 0.216 \pm 0.109$  ( $p = 0.051$ )

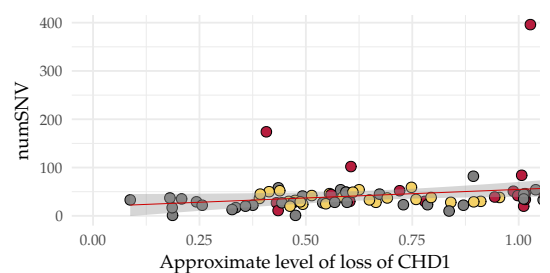

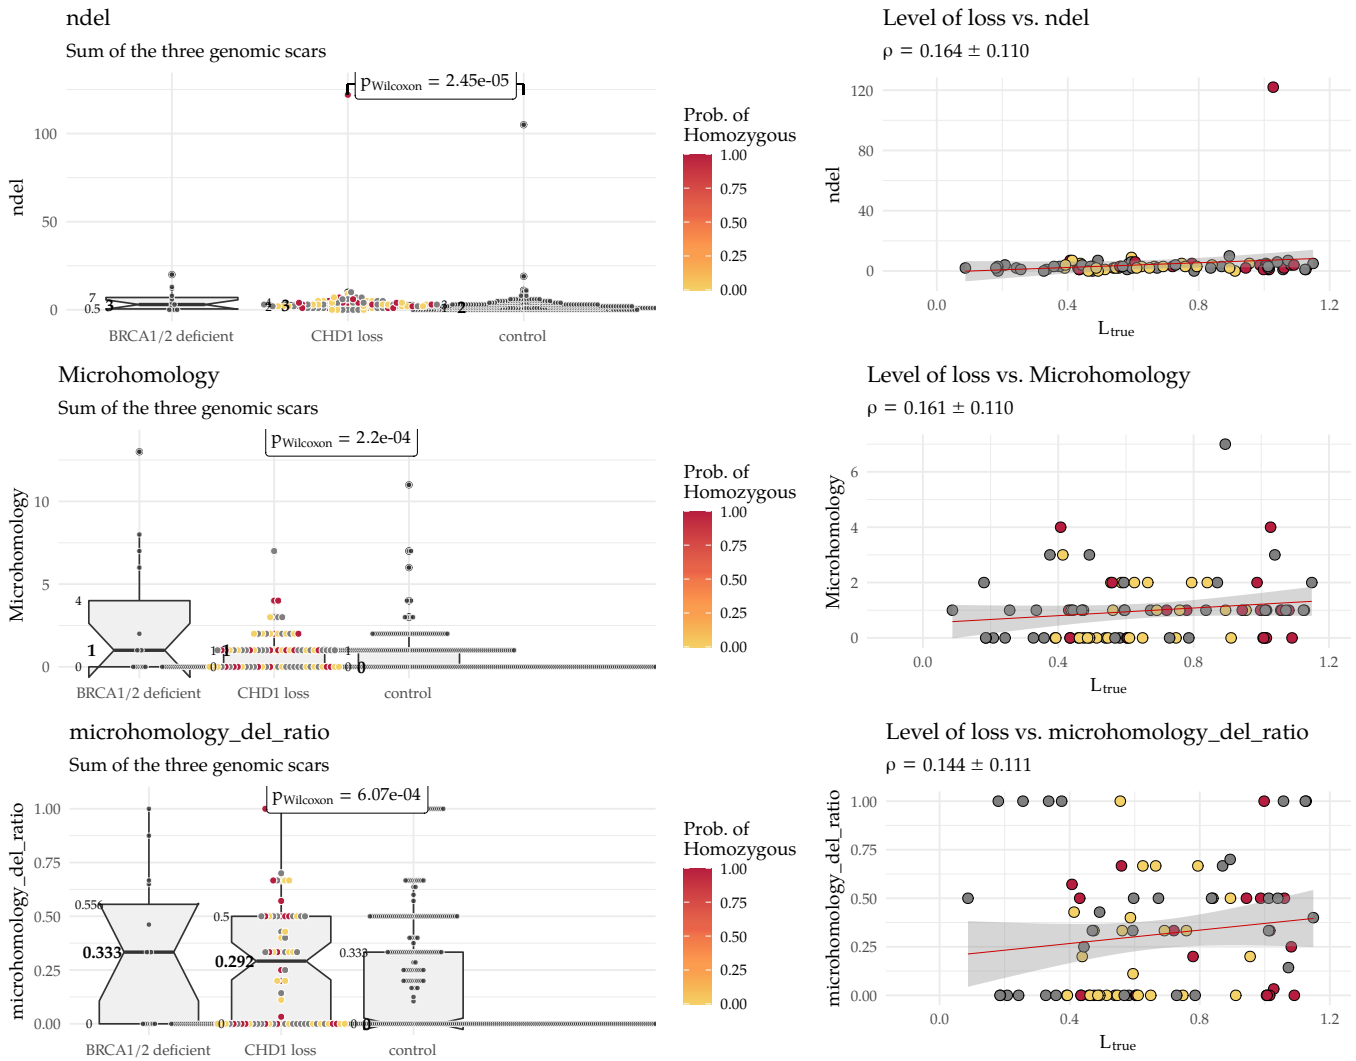

**Supplementary Figure 42:** The "traditional" classification of deletions. ndel: number of deletions, del\_ins\_ratio: deletion insertion ratio, microhomology: number of microhomology mediated deletions, microhomology\_del\_ratio: ratio of microhomology mediated deletions relative to the number of deletions – WES

## 1.1 HRDETECT

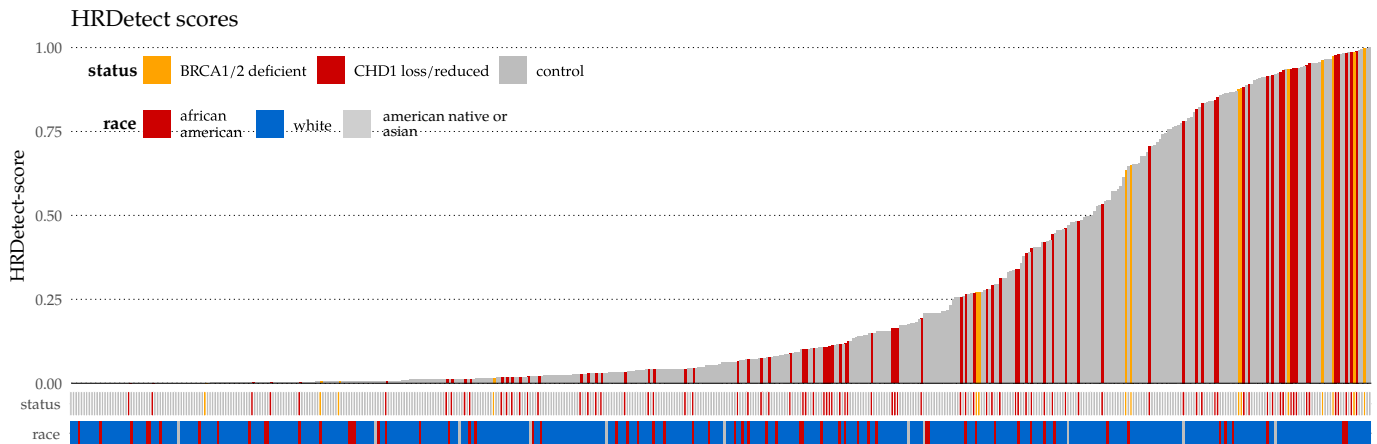

**Supplementary Figure 43:** HRDetect score summary – WES: For the whole exomes, we have used a different model, trained on 560 artificially derived (from whole genomes) breast cancer whole exomes: intercept = -2.619, Signature.17 = 0.0671, Signature.20 = 0.09409, Signature.26 = 0.1617, Signature.6 = 0.31, Signature.18 = 0.312, mhm.del.ratio = 0.314, Signature.8 = 0.615, Signature.13 = 0.8302, Signature.3 = 2.01, HRD-LOH = 2.387.

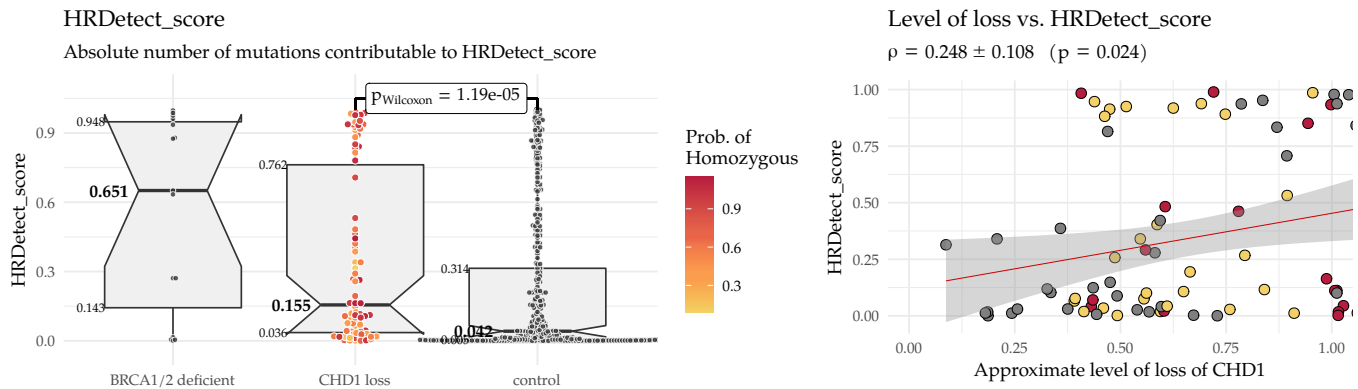

**Supplementary Figure 44:** HRDetect scores in samples with CHD1 loss vs. CHD1 intact samples

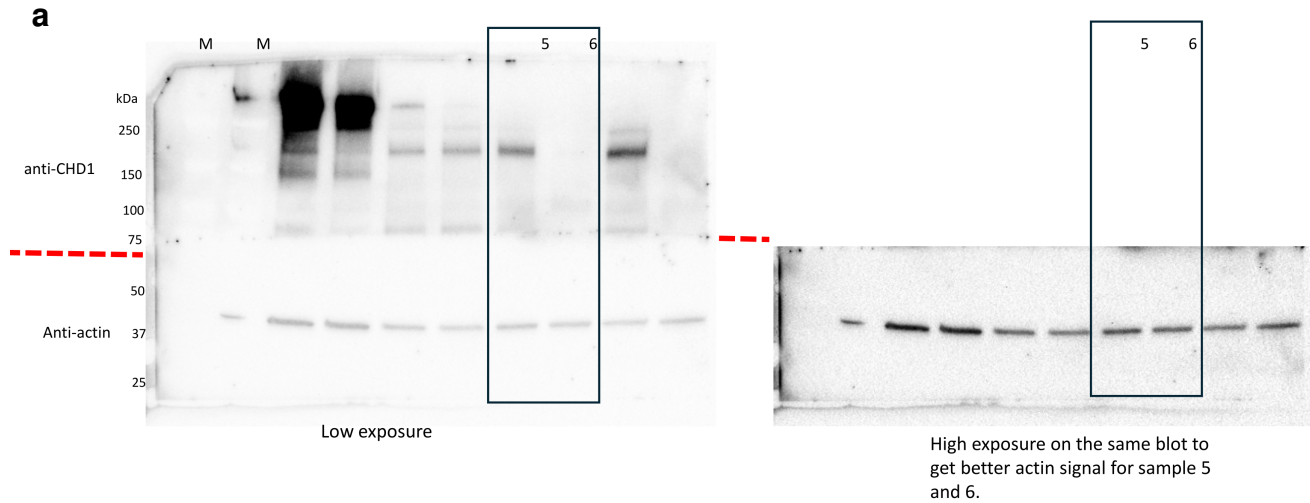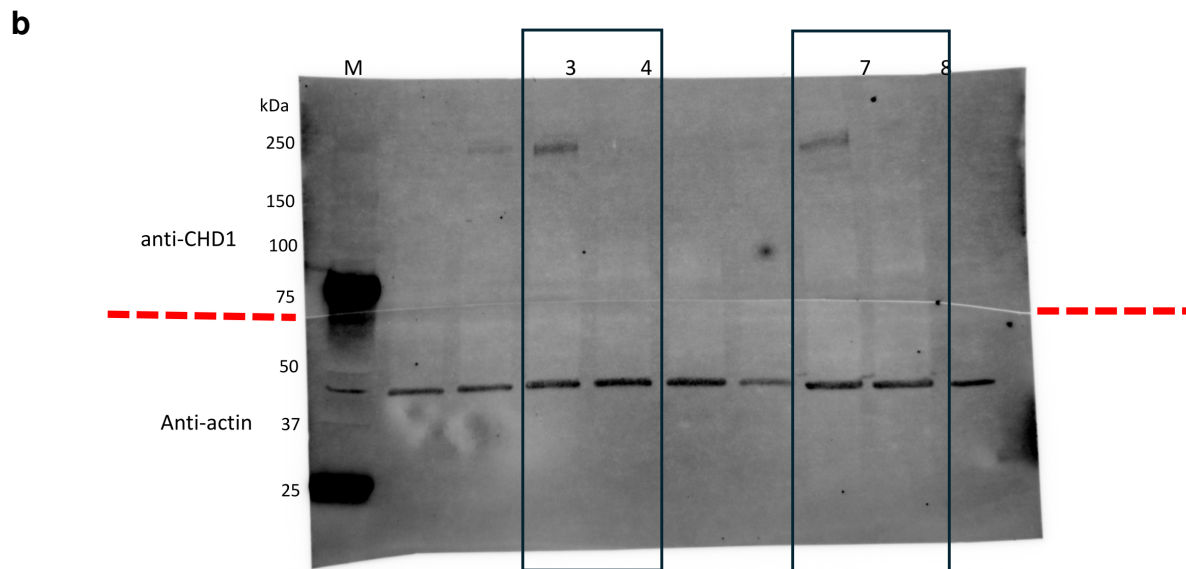

**Supplementary Figure 45: a:** Membrane cut between 75 and 50 KDa (red line) and incubated in anti-CHD1 (top half) and anti-Actin (bottom half) antibodies. Protein ladder (Precision Plus Protein Dual Color Standard (BioRad #1610374) marked as M. Samples 5 and 6 are presented in Figure 4g. **b:** Membrane cut between 75 and 50 KDa (red line) and incubated in anti-CHD1 (top half) and anti-Actin (bottom half) antibodies. Protein ladder (Precision Plus Protein Dual Color Standard (BioRad #1610374) marked as M. Samples 3 and 4 are presented in Figure 4h. Samples 7 and 8 are presented in Figure 4m.

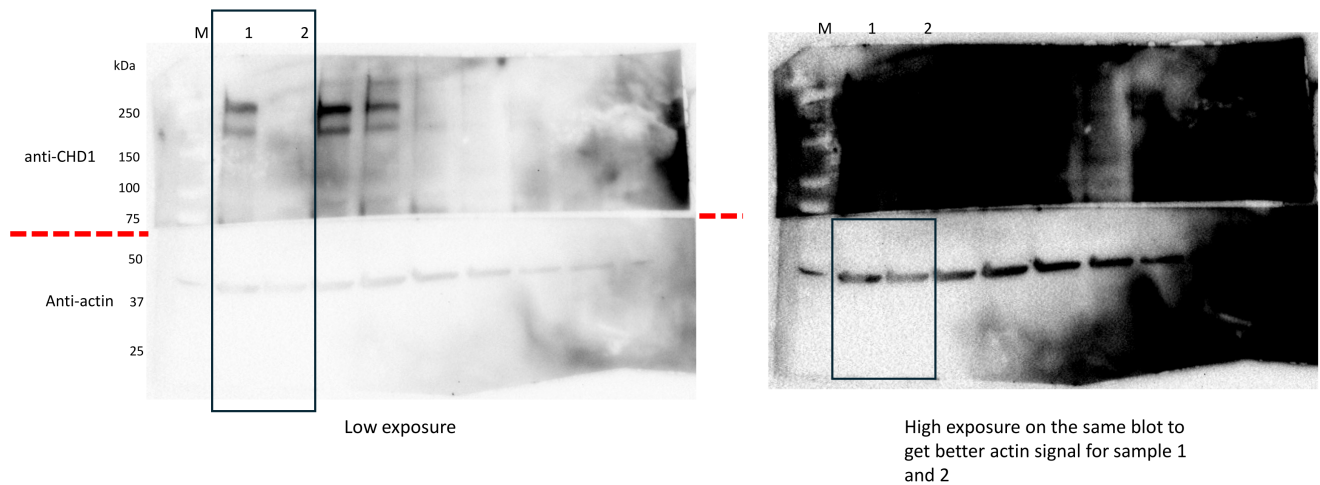

**Supplementary Figure 46:** Membrane cut between 75 and 50 KDa (red line) and incubated in anti-CHD1 (top half) and anti-Actin (bottom half) antibodies. Protein ladder (Precision Plus Protein Dual Color Standard (BioRad #1610374) marked as M. Samples 1 and 2 are presented in Figure 4n.

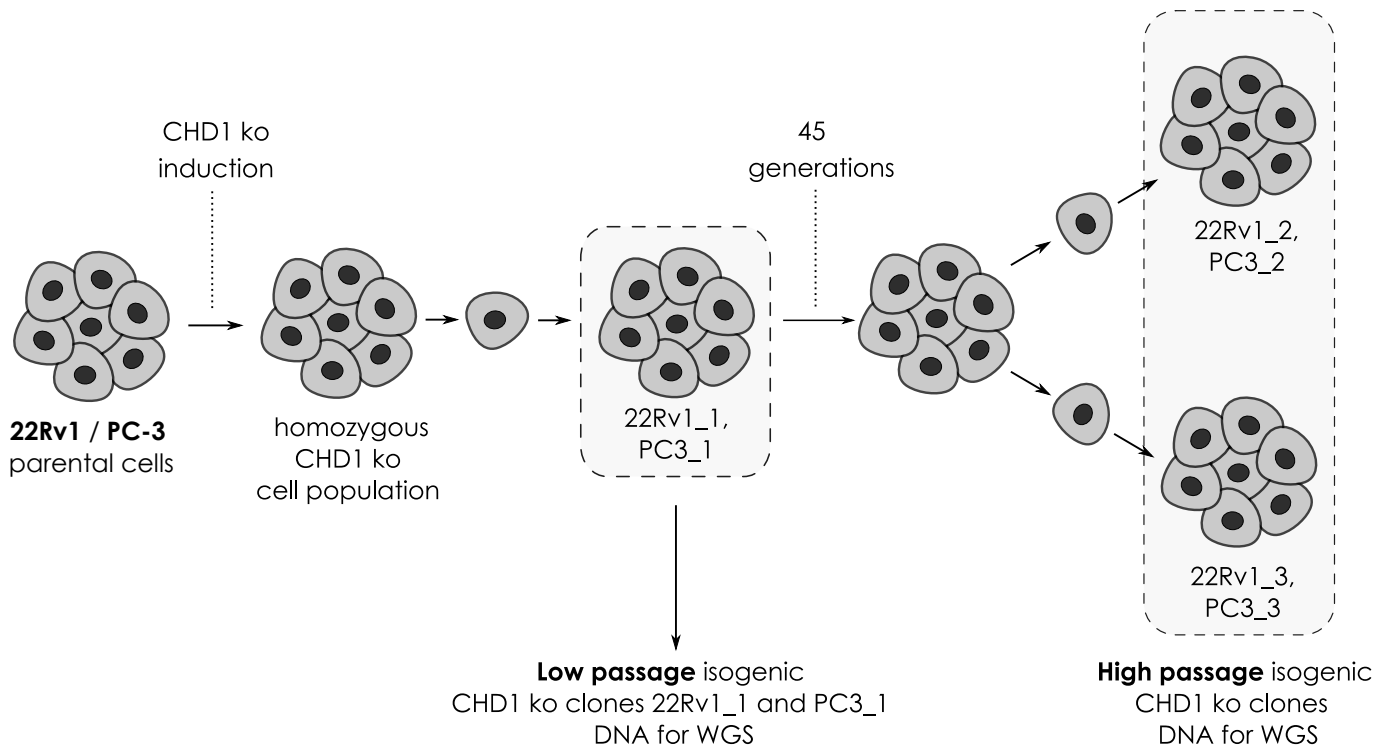

**Supplementary Figure 47:** Illustration of the PC-3 and 22Rv1 CHD1 ko isogenic clone generation for WGS. CHD1 knock out (ko) was induced in the parental PC-3 and 22Rv1 cell lines. The CHD1 ko cell populations were single cell cloned. Isogenic cell lines displaying homozygous CHD1 ko were identified. DNA was extracted directly from the regenerated population (22Rv1\_1 and PC3\_1, low passage stage). Cells were further propagated through 45 generations, then the high passage cell populations were single cell cloned. DNA was extracted from two isogenic CHD1 ko clones for each cell line (22Rv1\_2, 22Rv1\_3, and PC3\_2, PC3\_3 high passage stage) after propagation. The process is illustrated in Suppl. Figure 47. Normal references were downloaded from the Sequence Read Archive (SRA, 22Rv1: SRX5437595, PC-3: SRX5466646)

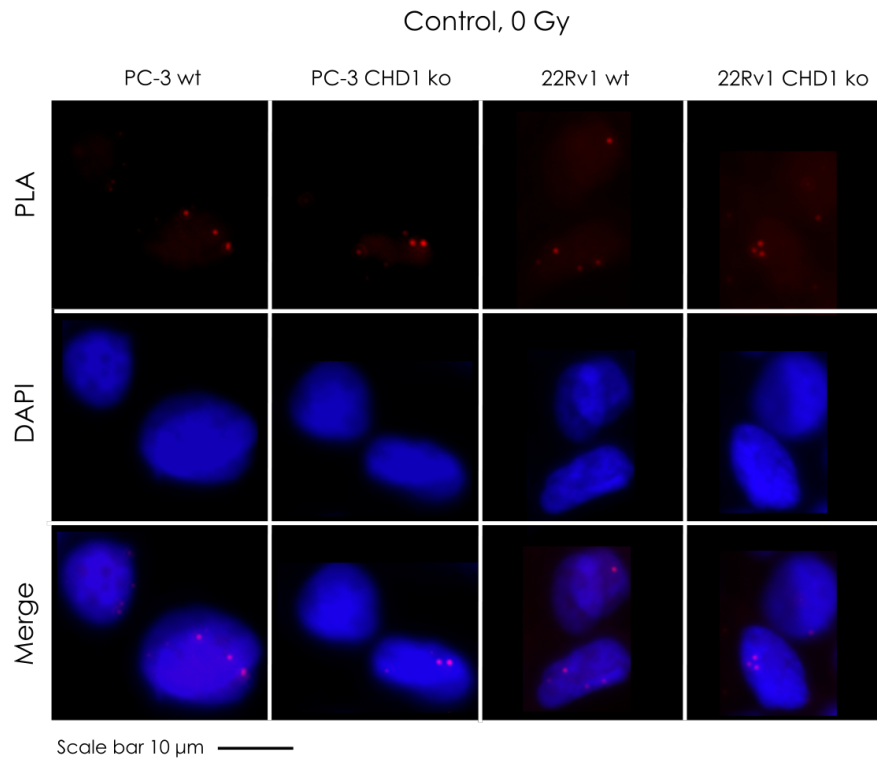

**Supplementary Figure 48:** RAD51 foci formation. Examples of the most common staining patterns in WT and CHD1 ko 22Rv1 and PC-3 cell lines. Control cells were fixed by 4% PFA without irradiation (IR=0Gy). PLA was carried out using antibodies against  $\gamma\text{H2Ax}$  and RAD51 proteins.

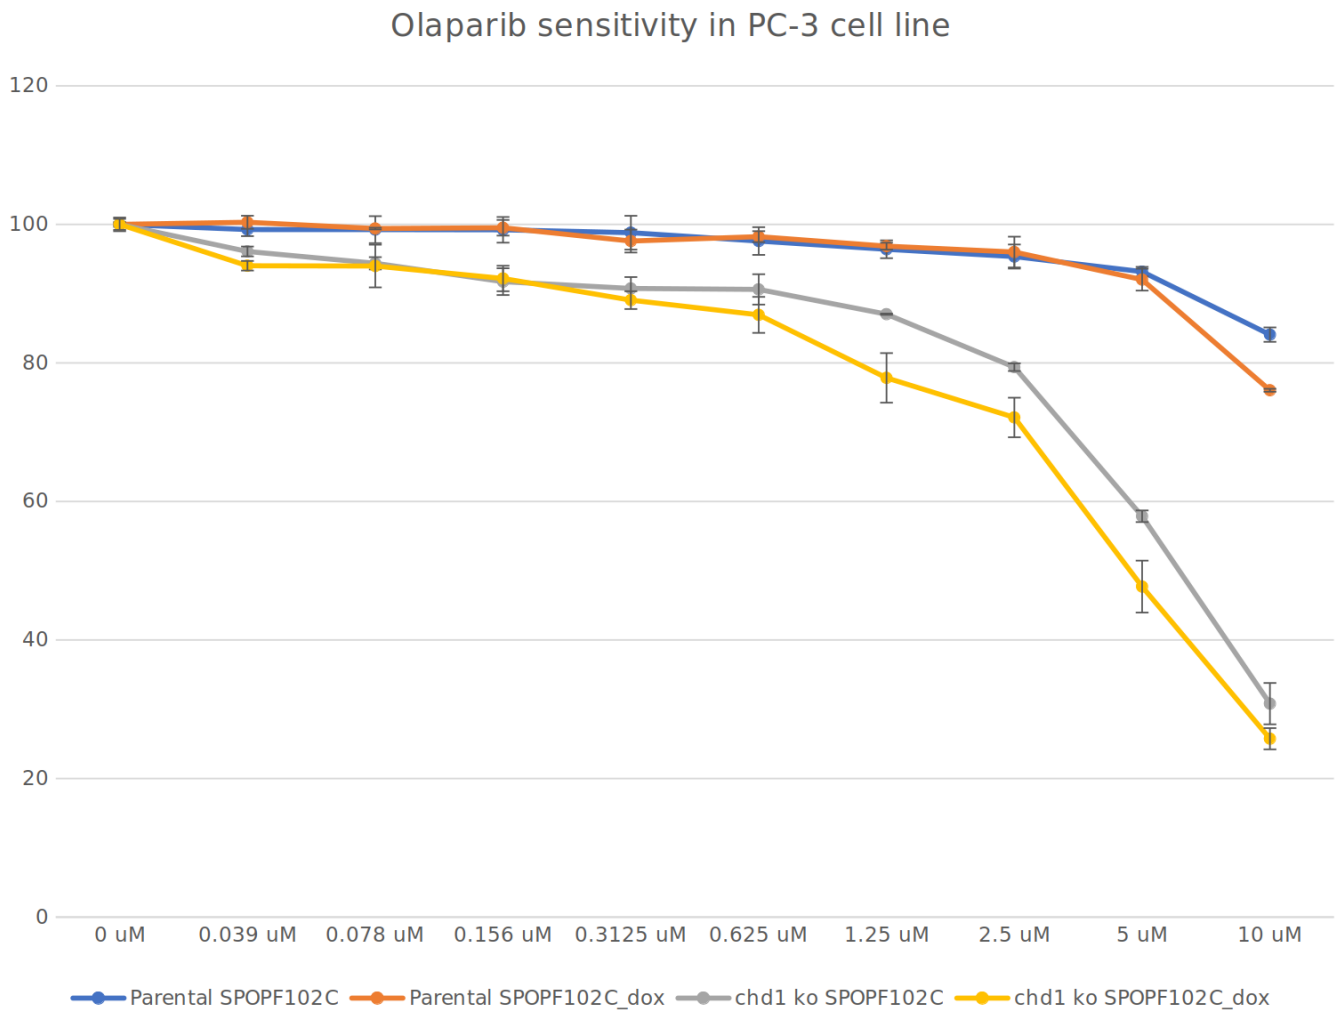

Supplementary Figure 49: Olaparib sensitivity in PC3 cell line

**SPOP<sup>F102C</sup> overexpression in PC-3 and 22Rv1 parental and chd1 knock out cell lines**

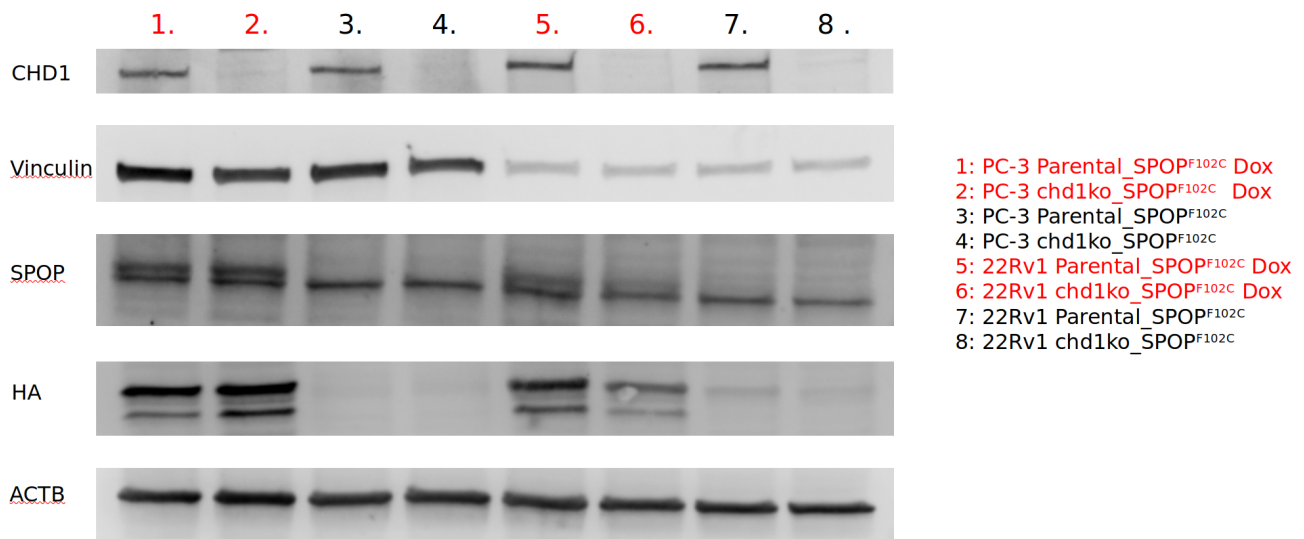

**Supplementary Figure 50:** *SPOP<sup>F102C</sup>* overexpression in PC-3 and 22Rv1 parental and CHD1 knock out cell lines



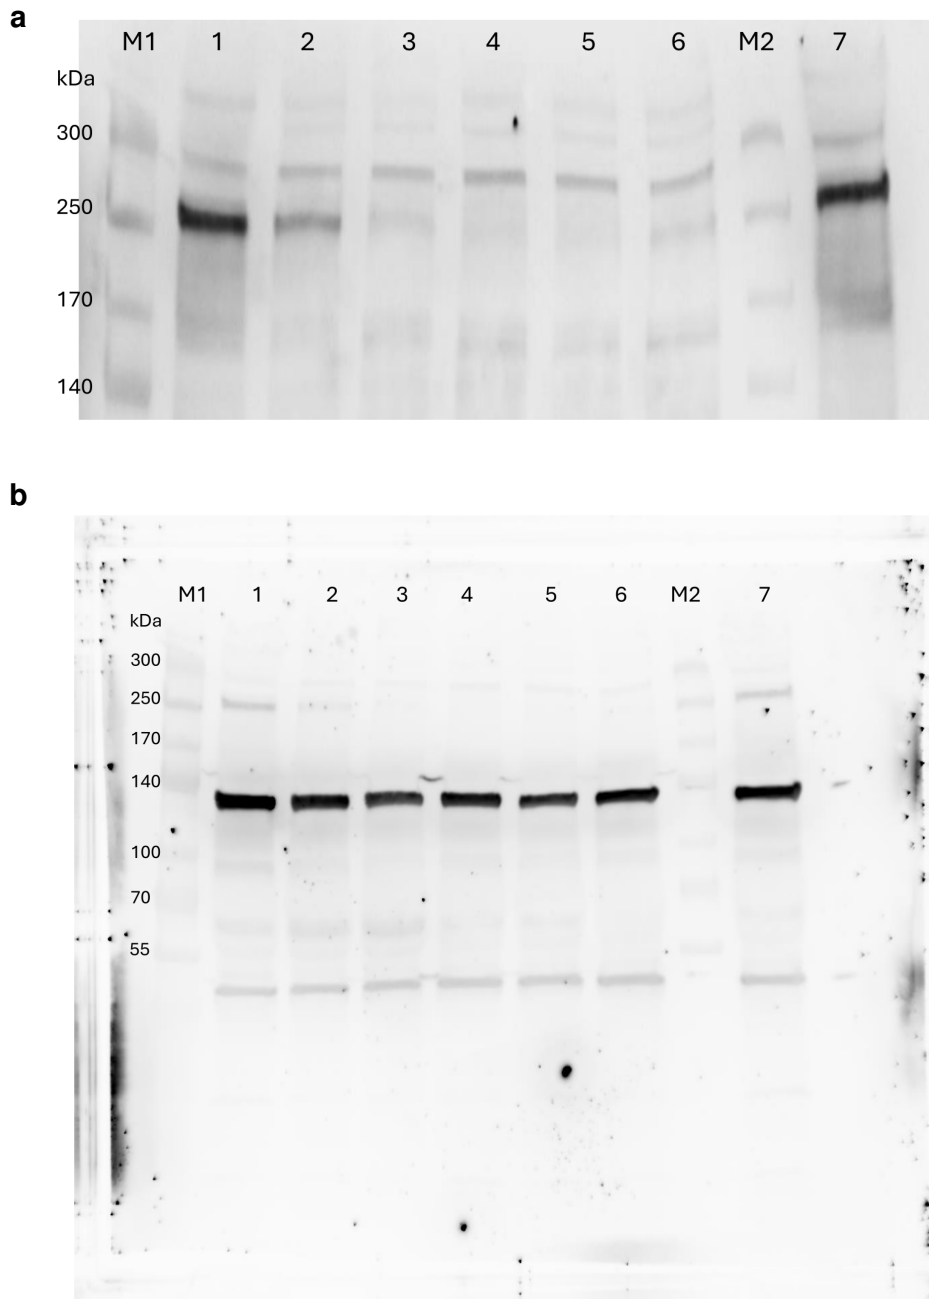

1: PC-3 Cas9 expressor wt parental      5: PC-3 del62 chd1 ko  
 2: PC-3 del51 chd1 ko                    6: PC-3 del71 chd1 ko  
 3: PC-3 del6 chd1 ko  
 4: PC-3 del35 chd1 ko                    7: PC-3 wt population  
 M1,2: ProSieve QuadColor Protein Marker (Lonza)

**Supplementary Figure 51:** **a:** Uncropped CHD1 (240 kDa) immunoblot Samples 1, 4 and 6 are presented in Figure 4a. **b:** Uncropped Vinculin (upper bands, 125 kDa) and Actin (lower bands, 42kDa) immunoblot. Samples 1, 4 and 6 are presented in Figure 4a.

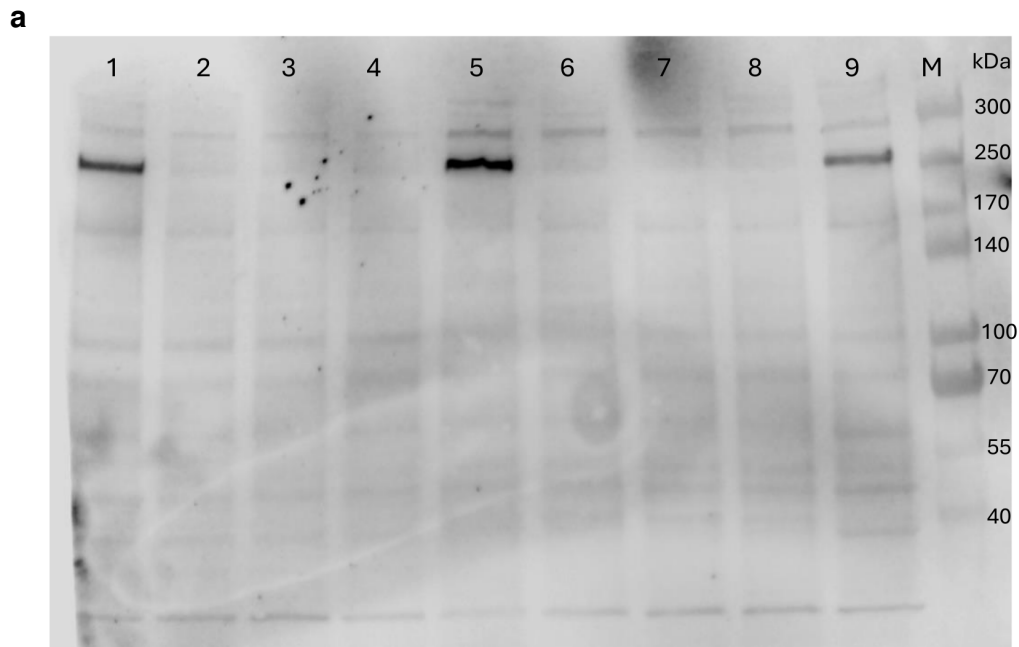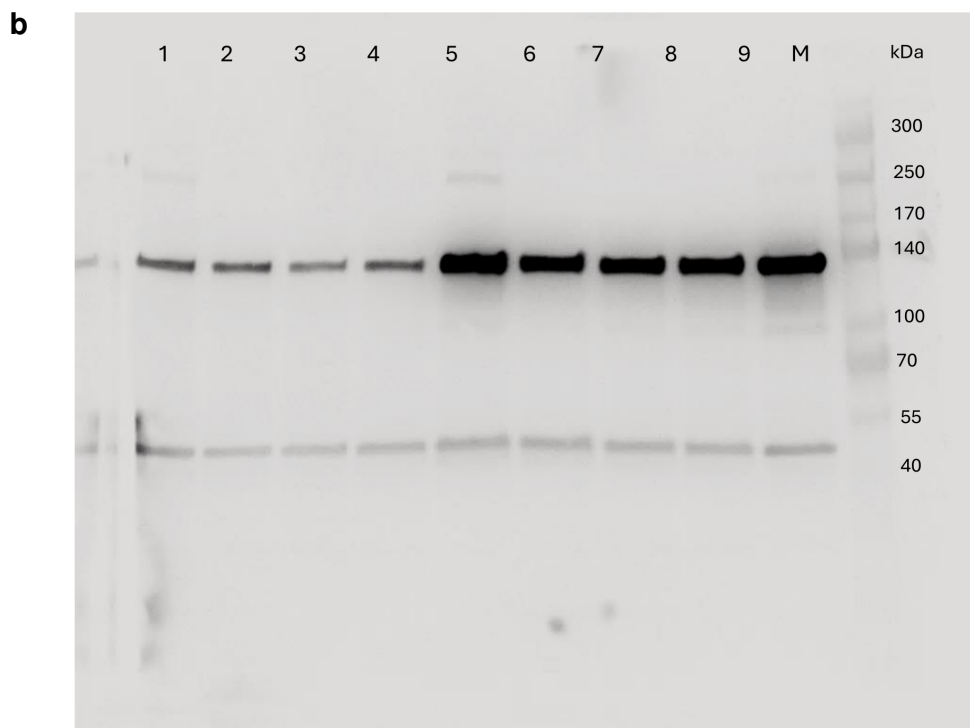

- |                          |                                              |
|--------------------------|----------------------------------------------|
| 1: 22Rv1 wt              | 6: PC3_chd1 ko P early                       |
| 2: 22Rv1_chd1 ko P early | 7: PC3_chd1 ko P30_1                         |
| 3: 22Rv1_chd1 ko P45_1   | 8: PC3_chd1 ko P30_2                         |
| 4: 22Rv1_chd1 ko P45_1   | 9: RPE1/Cas9 P45_pop                         |
| 5: PC3/Cas9 Clone1       | M: ProSieve QuadColor Protein Marker (Lonza) |

**Supplementary Figure 52: a:** Uncropped CHD1 (240 kDa) immunoblot. Samples 1 and 2 are presented in Figure 4b. **b:** Uncropped Vinculin (upper bands, 125 kDa) and Actin (lower bands, 42 kDa) immunoblot. Samples 1 and 2 are presented in Figure 4b.

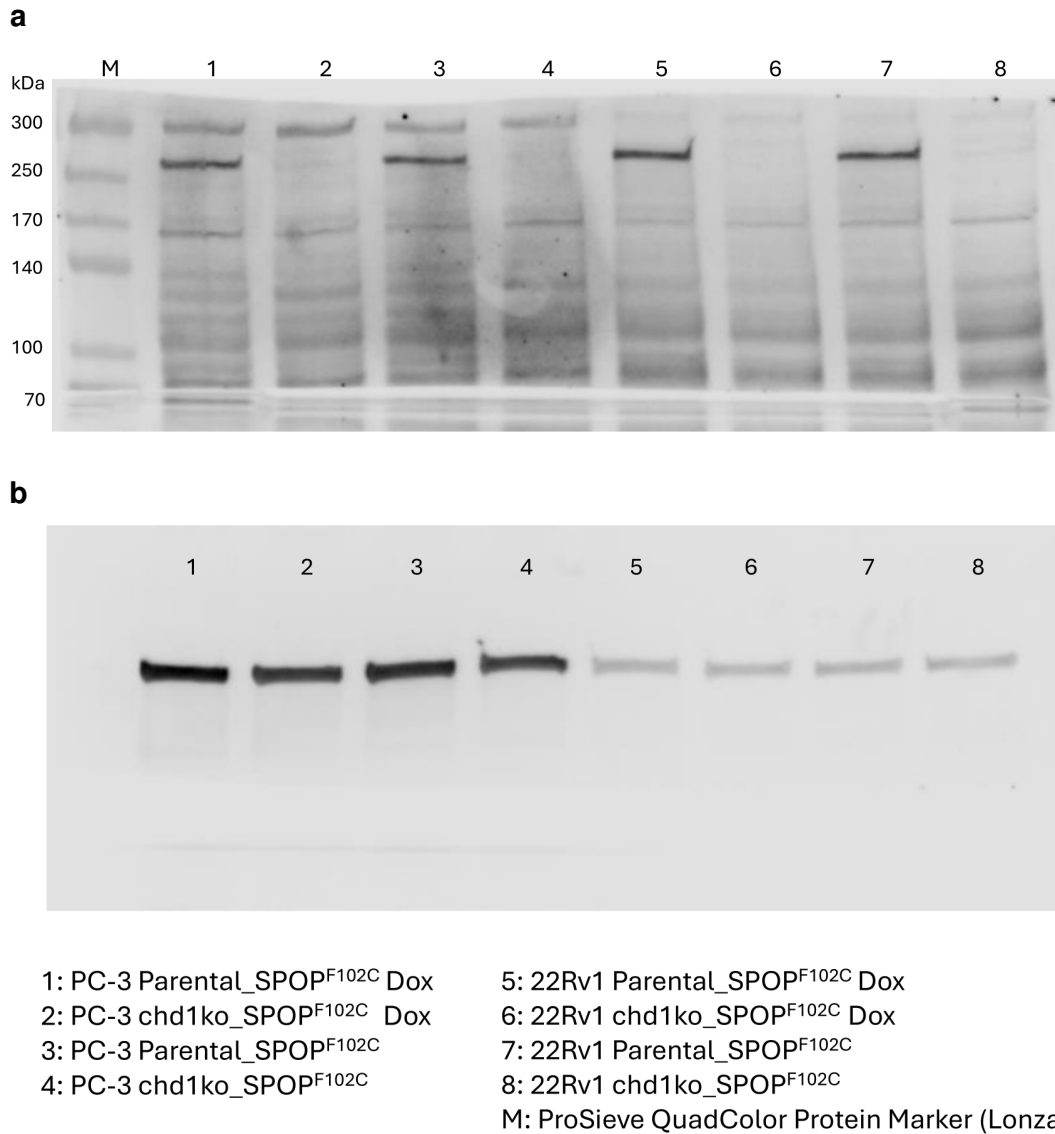

**Supplementary Figure 53: a:** Uncropped CHD1 (240 kDa, panel a ) and Vinculin (125 kDa, panel b) immunoblot. Samples 1-8 are presented in Supplementary Figure 48.

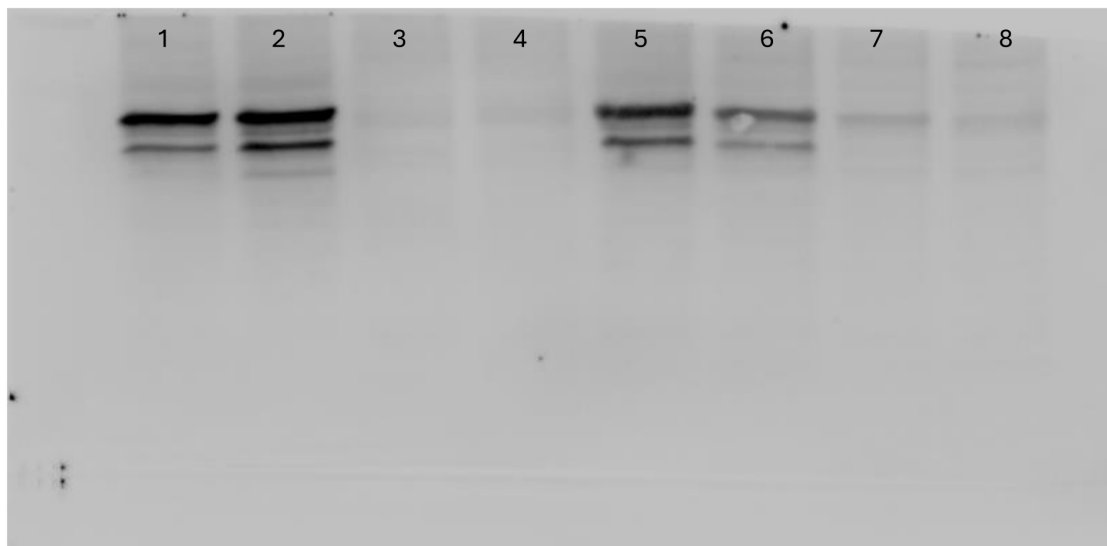

1: PC-3 Parental\_SPOP<sup>F102C</sup> Dox  
2: PC-3 chd1ko\_SPOP<sup>F102C</sup> Dox  
3: PC-3 Parental\_SPOP<sup>F102C</sup>  
4: PC-3 chd1ko\_SPOP<sup>F102C</sup>

5: 22Rv1 Parental\_SPOP<sup>F102C</sup> Dox  
6: 22Rv1 chd1ko\_SPOP<sup>F102C</sup> Dox  
7: 22Rv1 Parental\_SPOP<sup>F102C</sup>  
8: 22Rv1 chd1ko\_SPOP<sup>F102C</sup>

**Supplementary Figure 54:** Uncropped HA (SPOP+HA cca 43 kDa) immunoblot. Samples 1-8 are presented in Supplementary Figure 48.

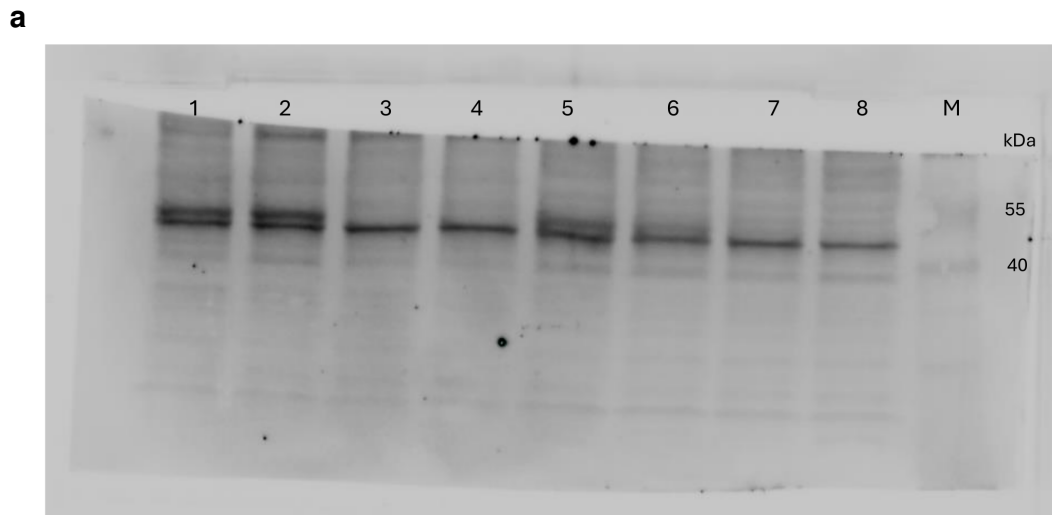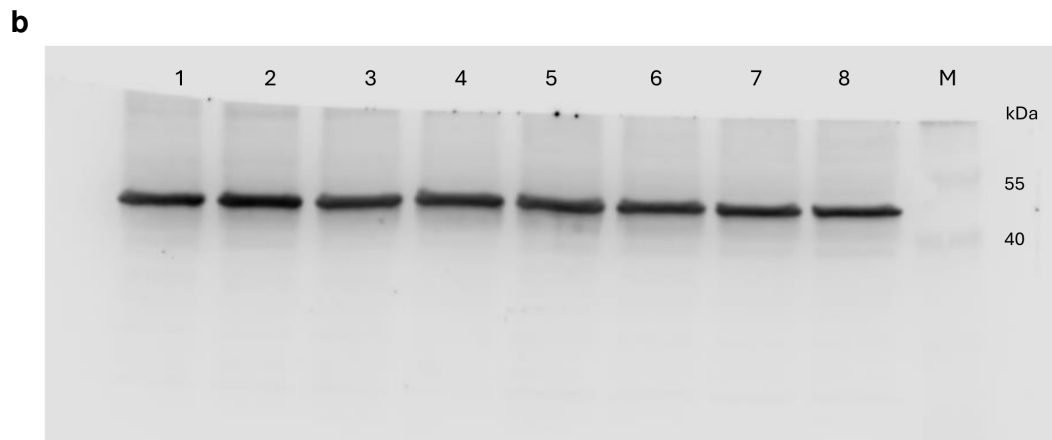

- 1: PC-3 Parental\_SPOF<sup>F102C</sup> Dox      6: 22Rv1 chd1ko\_SPOF<sup>F102C</sup> Dox  
2: PC-3 chd1ko\_SPOF<sup>F102C</sup> Dox      7: 22Rv1 Parental\_SPOF<sup>F102C</sup>  
3: PC-3 Parental\_SPOF<sup>F102C</sup>      8: 22Rv1 chd1ko\_SPOF<sup>F102C</sup>  
4: PC-3 chd1ko\_SPOF<sup>F102C</sup>      M: ProSieve QuadColor Protein Marker (Lonza)  
5: 22Rv1 Parental\_SPOF<sup>F102C</sup> Dox

**Supplementary Figure 55:** Uncropped SPOF ( 42 kDa, upper ) and Actin (42 kDa, lower) immunoblot. Samples 1-8 are presented in Supplementary Figure 48.
